# Supplementary material
Source: publisher figshare collection journal article supplement (https://acs.figshare.com/ndownloader/files/3900421)
Supplement: Supplementary file 1 [file 3900421]

#\#CIF_1.1
 
#  CIF produced by WinGX routine CIF_UPDATE
#  Created on 2014-03-27 at 15:45:19
#  Using CIFtbx version 3.0.4  1 Sep 2006
 
#  Dictionary name : cif_core.dic
#  Dictionary vers : 2.4.3
#  Request file    : e:\my progs\wingx\files\archive.reqdat
#  CIF files read  : shelx project
 
#------------------ SECTION 1. GLOBAL INFORMATION ---------------------------#
 
data_global
 
#------------------ AUDIT DETAILS -------------------------------------------#
 
_audit_creation_date            2014-03-27
_audit_creation_method          'WinGX routine CIF_UPDATE'
_audit_conform_dict_name        cif_core.dic
_audit_conform_dict_version     2.4.3
_audit_conform_dict_location    ftp://ftp.iucr.org/pub/cif_core.dic
_audit_update_record            ?
 
#------------------ AUTHOR DETAILS -------------------------------------------#
 
# Name and address of author for correspondence
 
_publ_contact_author_name       'Farrugia, Louis J.'
_publ_contact_author_address
;
WESTChem School of Chemistry
Joseph Black Building
University of Glasgow
Glasgow G12 8QQ, Scotland UK
;
_publ_contact_author_email       'louis.farrugia@glasgow.ac.uk'
_publ_contact_author_fax         '44(0141)3304888'
_publ_contact_author_phone       '44(0141)3305137'
 
 
# Insert blank lines between references
 
_publ_section_references
;
Blessing, R. H. (1995) Acta Cryst., A51, 33-38.
 
Blessing, R. H. (1987) Cryst. Rev. 1, 3-58.
 
Blessing, R. H. (1989) J. Appl. Cryst. 22, 396-397.
 
Bruker (2012) APEX2 (Version 2012.10-0), SAINT (version 8.27B), SADABS
(version 2012/1), BrukerAXS Inc, Madison, Wisconsin, USA.
 
 
COLLECT: Nonius (1998). COLLECT. Nonius BV, Delft, The Netherlands.
 
DENZO/SCALEPACK:  Otwinowski, Z. & Minor, W. (1997). Methods in Enzymology,
Vol. 276, Macromolecular Crystallography, Part A, edited by C. W. Carter Jr
& R. M. Sweet, pp. 307-326. New York: Academic Press.
 
DIAMOND: Brandenburg, K.(2006). DIAMOND. Crystal Impact GbR, Bonn, Germany.
 
DIRDIF-2008: Beurskens, P.T., Beurskens, G., de Gelder, R., Garci\'ia-Granda,
S., Gould, R.O. & Smits, J.M.M. (2008) The DIRDIF-2008 program
system, Crystallography Laboratory, Radboud University  Nijmegen,
The Netherlands.
 
EDMA: Palatinus, L., Prathapa, S. J. & van Smaalen, S. (2012) J. Appl. Cryst.
45, 575-580.
 
enCIFer: Allen, F. H., Johnson, O., Shields, G. P., Smith, B. R. & Towler,
M. (2004). J. Appl. Cryst. 37, 335-338.
 
ORTEP-3: Farrugia, L. J. (2012). J. Appl. Cryst. 45, 849-854.
 
PLATON: Spek, A. L. (2009). Acta. Cryst. D65, 148-155.
 
SHELX: Sheldrick, G. M. (2008). Acta Cryst. A64, 112-122.
 
SHELXT: Sheldrick, G. M. (2014) University of Goettingen, Germany.
 
SIR92: Altomare, A., Cascarano, G., Giacovazzo, C., Guagliardi, A., Burla,
M. C., Polidori, G. & Camalli, M. (1994). J. Appl. Cryst. 27, 435.
 
SUPERFLIP: Palatinus, L. & Chapuis, G. (2007) J. Appl. Cryst. 40, 786-790.
 
SXD2001: Gutmann, M. J. SXD2001, ISIS Facility, Rutherford Appleton Laboratory
Oxfordshire, England, 2005.
 
WinGX: Farrugia, L. J. (2012). J. Appl. Cryst. 45, 849-854.
;
 
#------------------  SECTION 2. COMPOUND(S) DETAILS -------------------------#
 
data_shelx
 
_audit_creation_date                    2014-03-27T15:45:19-00:00
_audit_creation_method                  'WinGX routine CIF_UPDATE'
_audit_conform_dict_name                cif_core.dic
_audit_conform_dict_version             2.4.3
_audit_conform_dict_location            ftp://ftp.iucr.org/pub/cif_core.dic
_publ_requested_category                FO
 
#----------------------------------------------------------------------------#
#                   CHEMICAL INFORMATION                                     #
#----------------------------------------------------------------------------#
 
_chemical_name_systematic
;
 ?
;
_chemical_formula_moiety                'C20 H32 O3'
_chemical_formula_sum                   'C20 H32 O3'
_chemical_formula_weight                320.45
_chemical_compound_source               'as described'
_chemical_absolute_configuration        rm
 
#----------------------------------------------------------------------------#
#                   UNIT CELL INFORMATION                                    #
#----------------------------------------------------------------------------#
 
_symmetry_cell_setting                  trigonal
_symmetry_space_group_name_H-M          'P 32 2 1'
_symmetry_space_group_name_Hall         'P 32 2"'
_symmetry_Int_Tables_number             154
loop_
    _symmetry_equiv_pos_as_xyz
'x, y, z'
'-y, x-y, z+2/3'
'-x+y, -x, z+1/3'
'x-y, -y, -z+1/3'
'-x, -x+y, -z+2/3'
'y, x, -z'
 
_cell_length_a                          17.4587(6)
_cell_length_b                          17.4587(6)
_cell_length_c                          10.7319(4)
_cell_angle_alpha                       90
_cell_angle_beta                        90
_cell_angle_gamma                       120
_cell_volume                            2832.9(2)
_cell_formula_units_Z                   6
_cell_measurement_temperature           298(2)
_cell_measurement_reflns_used           9901
_cell_measurement_theta_min             2.33
_cell_measurement_theta_max             26.44
_cell_measurement_wavelength            0.71073
 
#----------------------------------------------------------------------------#
#                   CRYSTAL INFORMATION                                      #
#----------------------------------------------------------------------------#
 
_exptl_crystal_description              plate
_exptl_crystal_colour                   colourless
_exptl_crystal_size_max                 0.6
_exptl_crystal_size_mid                 0.2
_exptl_crystal_size_min                 0.1
_exptl_crystal_density_diffrn           1.127
_exptl_crystal_density_method           'not measured'
_exptl_crystal_F_000                    1056
_exptl_special_details
;
 ?
;
 
#----------------------------------------------------------------------------#
#                   ABSORPTION CORRECTION                                    #
#----------------------------------------------------------------------------#
 
_exptl_absorpt_coefficient_mu           0.074
_exptl_absorpt_correction_type          multi-scan
_exptl_absorpt_process_details
;
SADABS-2012/1 - Bruker AXS area detector scaling and absorption correction
;
_exptl_absorpt_correction_T_min         0.638
_exptl_absorpt_correction_T_max         0.746
_shelx_estimated_absorpt_T_min          0.957
_shelx_estimated_absorpt_T_max          0.993
 
#----------------------------------------------------------------------------#
#                   DATA COLLECTION                                          #
#----------------------------------------------------------------------------#
 
_diffrn_source                          'sealed x-ray tube'
_diffrn_ambient_temperature             298(2)
_diffrn_radiation_wavelength            0.71073
_diffrn_radiation_type                  MoK\a
_diffrn_radiation_monochromator         graphite
_diffrn_radiation_probe                 x-ray
_diffrn_detector                        'APEX-II CCD'
_diffrn_orient_matrix_ub_11             -0.055962
_diffrn_orient_matrix_ub_12             0.001494
_diffrn_orient_matrix_ub_13             0.012935
_diffrn_orient_matrix_ub_21             0.033665
_diffrn_orient_matrix_ub_22             0.065944
_diffrn_orient_matrix_ub_23             -0.007066
_diffrn_orient_matrix_ub_31             -0.010453
_diffrn_orient_matrix_ub_32             -0.004855
_diffrn_orient_matrix_ub_33             -0.092007
_diffrn_measurement_device              '\k-geometry diffractometer'
_diffrn_measurement_device_type         'Bruker APEX-II'
_diffrn_measurement_method              '\f or \w oscillation scans'
_diffrn_reflns_av_R_equivalents         0.091
_diffrn_reflns_number                   74902
_diffrn_reflns_limit_h_min              -22
_diffrn_reflns_limit_h_max              22
_diffrn_reflns_limit_k_min              -22
_diffrn_reflns_limit_k_max              22
_diffrn_reflns_limit_l_min              -13
_diffrn_reflns_limit_l_max              13
_diffrn_reflns_theta_min                1.347
_diffrn_reflns_theta_max                25.958
_diffrn_reflns_theta_full               25.242
_diffrn_measured_fraction_theta_full
                                        1
_diffrn_measured_fraction_theta_max
                                        1
_diffrn_reflns_Laue_measured_fraction_full
                                        1
_diffrn_reflns_Laue_measured_fraction_max
                                        1
_diffrn_reflns_point_group_measured_fraction_full
                                        1
_diffrn_reflns_point_group_measured_fraction_max
                                        1
_reflns_number_total                    3714
_reflns_number_gt                       2784
_reflns_threshold_expression            'I > 2\s(I)'
_diffrn_reflns_reduction_process
;
        Scaled and merged with Sortav
        R.H. Blessing, (1987) Cryst. Rev. 1, 3-58
        R.H. Blessing, (1989) J. Appl. Cryst. 22, 396-397
;
 
#----------------------------------------------------------------------------#
#                   COMPUTER PROGRAMS USED                                   #
#----------------------------------------------------------------------------#
 
_computing_data_collection              'Bruker APEX2 software'
_computing_cell_refinement              'SAINT V8.27B integration software'
_computing_data_reduction               'SORTAV (Blessing, 1995)'
_computing_structure_solution           'SIR-92 (Altomare et al., 1994)'
_computing_structure_refinement         'SHELXL-2013 (Sheldrick, 2008)'
_computing_molecular_graphics           'ORTEP-3 for Windows (Farrugia, 2012)'
_computing_publication_material
                                   'WinGX publication routines (Farrugia, 2012)'
 
#----------------------------------------------------------------------------#
#                   STRUCTURE SOLUTION
#----------------------------------------------------------------------------#
 
_atom_sites_solution_primary            direct
_atom_sites_solution_secondary          direct
_atom_sites_solution_hydrogens          mixed
 
#----------------------------------------------------------------------------#
#                   REFINEMENT INFORMATION                                   #
#----------------------------------------------------------------------------#
 
_refine_special_details
;
 ?
;
_refine_ls_structure_factor_coef        Fsqd
_refine_ls_matrix_type                  full
_refine_ls_weighting_scheme             calc
_refine_ls_weighting_details
              'w=1/[\s^2^(Fo^2^)+(0.0383P)^2^+0.6609P] where P=(Fo^2^+2Fc^2^)/3'
_refine_ls_hydrogen_treatment           constr
_refine_ls_extinction_method            none
_refine_ls_number_reflns                3714
_refine_ls_number_parameters            212
_refine_ls_number_restraints            0
_refine_ls_number_constraints           0
_refine_ls_R_factor_all                 0.0764
_refine_ls_R_factor_gt                  0.0509
_refine_ls_wR_factor_ref                0.1192
_refine_ls_wR_factor_gt                 0.1122
_refine_ls_goodness_of_fit_ref          1.055
_refine_ls_restrained_S_all             1.055
_refine_ls_shift/su_max                 0
_refine_ls_shift/su_mean                0
_refine_ls_abs_structure_details
;
 Flack x determined using 1090 quotients [(I+)-(I-)]/[(I+)+(I-)]
 (Parsons, Flack and Wagner, Acta Cryst. B69 (2013) 249-259).
;
_refine_ls_abs_structure_Flack          -0.2(5)
_refine_diff_density_max                0.244
_refine_diff_density_min                -0.223
_refine_diff_density_rms                0.031
 
#----------------------------------------------------------------------------#
#                   ATOMIC TYPES, COORDINATES AND THERMAL PARAMETERS         #
#----------------------------------------------------------------------------#
 
loop_
    _atom_type_symbol
    _atom_type_description
    _atom_type_scat_dispersion_real
    _atom_type_scat_dispersion_imag
    _atom_type_scat_source
O O 0.0106 0.006 'International Tables Vol C Tables 4.2.6.8 and 6.1.1.4'
C C 0.0033 0.0016 'International Tables Vol C Tables 4.2.6.8 and 6.1.1.4'
H H 0 0 'International Tables Vol C Tables 4.2.6.8 and 6.1.1.4'
 
loop_
    _atom_site_label
    _atom_site_type_symbol
    _atom_site_fract_x
    _atom_site_fract_y
    _atom_site_fract_z
    _atom_site_U_iso_or_equiv
    _atom_site_adp_type
    _atom_site_occupancy
    _atom_site_calc_flag
    _atom_site_disorder_assembly
    _atom_site_disorder_group
O1 O 0.64104(15) 0.70519(14) 0.1165(2) 0.0549(6) Uani 1 d . .
O2 O 0.71032(15) 0.57575(15) 0.1209(2) 0.0622(6) Uani 1 d . .
H2 H 0.7097 0.602 0.0579 0.093 Uiso 1 calc . .
O3 O 0.8998(3) 0.9134(2) 0.1289(5) 0.152(2) Uani 1 d . .
H3A H 0.9288 0.9712 0.1596 0.228 Uiso 0.5 d . .
H3B H 0.9046 0.9091 0.0438 0.228 Uiso 0.5 d . .
C1 C 0.5404(2) 0.6225(2) 0.2759(3) 0.0473(7) Uani 1 d . .
H1 H 0.5412 0.592 0.3522 0.057 Uiso 1 calc . .
C2 C 0.6067(2) 0.6222(2) 0.1818(3) 0.0444(7) Uani 1 d . .
H2A H 0.5719 0.5756 0.1211 0.053 Uiso 1 calc . .
C3 C 0.6821(2) 0.6066(2) 0.2260(3) 0.0502(7) Uani 1 d . .
C4 C 0.7625(2) 0.6897(2) 0.2805(4) 0.0657(10) Uani 1 d . .
H4A H 0.7411 0.7159 0.3411 0.079 Uiso 1 calc . .
H4B H 0.799 0.6713 0.3248 0.079 Uiso 1 calc . .
C5 C 0.8206(3) 0.7611(2) 0.1861(4) 0.0786(12) Uani 1 d . .
H5A H 0.8724 0.756 0.169 0.094 Uiso 1 calc . .
H5B H 0.788 0.7501 0.1088 0.094 Uiso 1 calc . .
C6 C 0.8509(3) 0.8551(3) 0.2277(6) 0.0965(15) Uani 1 d . .
H6 H 0.8918 0.8682 0.2975 0.116 Uiso 1 calc . .
C7 C 0.7786(3) 0.8730(2) 0.2719(5) 0.0871(14) Uani 1 d . .
C8 C 0.7043(3) 0.8581(2) 0.1855(4) 0.0779(11) Uani 1 d . .
H8A H 0.7285 0.8734 0.102 0.093 Uiso 1 calc . .
H8B H 0.6854 0.8998 0.2084 0.093 Uiso 1 calc . .
C9 C 0.6215(2) 0.7662(2) 0.1792(3) 0.0591(9) Uani 1 d . .
H9 H 0.5771 0.7712 0.1297 0.071 Uiso 1 calc . .
C10 C 0.5783(2) 0.7220(2) 0.3038(3) 0.0545(8) Uani 1 d . .
H10 H 0.6251 0.74 0.3663 0.065 Uiso 1 calc . .
C11 C 0.5116(3) 0.7463(2) 0.3516(3) 0.0654(10) Uani 1 d . .
C12 C 0.4216(3) 0.6990(3) 0.2916(4) 0.0784(12) Uani 1 d . .
H12A H 0.4257 0.7193 0.2065 0.094 Uiso 1 calc . .
H12B H 0.3814 0.7123 0.3367 0.094 Uiso 1 calc . .
C13 C 0.3856(3) 0.5992(3) 0.2924(4) 0.0714(11) Uani 1 d . .
H13A H 0.3801 0.5788 0.3777 0.086 Uiso 1 calc . .
H13B H 0.3272 0.5694 0.2549 0.086 Uiso 1 calc . .
C14 C 0.4466(2) 0.5757(2) 0.2205(3) 0.0565(8) Uani 1 d . .
H14 H 0.4516 0.5988 0.1359 0.068 Uiso 1 calc . .
C15 C 0.4082(2) 0.4744(3) 0.2077(4) 0.0711(10) Uani 1 d . .
H15 H 0.456 0.4657 0.1766 0.085 Uiso 1 calc . .
C16 C 0.3340(3) 0.4344(4) 0.1110(6) 0.133(2) Uani 1 d . .
H16A H 0.315 0.3729 0.1002 0.2 Uiso 1 calc . .
H16B H 0.3554 0.4647 0.033 0.2 Uiso 1 calc . .
H16C H 0.2852 0.4406 0.139 0.2 Uiso 1 calc . .
C17 C 0.3779(4) 0.4252(3) 0.3325(6) 0.125(2) Uani 1 d . .
H17A H 0.4227 0.4562 0.3944 0.188 Uiso 1 calc . .
H17B H 0.3683 0.3664 0.323 0.188 Uiso 1 calc . .
H17C H 0.3239 0.4223 0.3582 0.188 Uiso 1 calc . .
C18 C 0.6476(2) 0.5309(2) 0.3195(3) 0.0614(9) Uani 1 d . .
H18A H 0.5922 0.483 0.2906 0.092 Uiso 1 calc . .
H18B H 0.6391 0.551 0.3988 0.092 Uiso 1 calc . .
H18C H 0.6896 0.511 0.3279 0.092 Uiso 1 calc . .
C19 C 0.7872(4) 0.9099(3) 0.3825(6) 0.1202(19) Uani 1 d . .
H19A H 0.747 0.9271 0.4079 0.144 Uiso 1 calc . .
H19B H 0.8333 0.9188 0.4349 0.144 Uiso 1 calc . .
C20 C 0.5310(4) 0.8033(3) 0.4437(4) 0.0929(14) Uani 1 d . .
H20A H 0.4882 0.8155 0.4738 0.112 Uiso 1 calc . .
H20B H 0.5873 0.8313 0.4784 0.112 Uiso 1 calc . .
 
loop_
    _atom_site_aniso_label
    _atom_site_aniso_U_11
    _atom_site_aniso_U_22
    _atom_site_aniso_U_33
    _atom_site_aniso_U_23
    _atom_site_aniso_U_13
    _atom_site_aniso_U_12
O1 0.0658(14) 0.0525(12) 0.0624(12) 0.0153(11) 0.0159(11) 0.0416(11)
O2 0.0598(14) 0.0571(14) 0.0851(16) 0.0064(13) 0.0105(13) 0.0408(12)
O3 0.107(3) 0.0526(18) 0.285(6) 0.052(3) 0.089(3) 0.0320(18)
C1 0.0580(18) 0.0544(18) 0.0439(16) 0.0074(14) 0.0021(13) 0.0389(16)
C2 0.0484(17) 0.0416(15) 0.0488(16) 0.0077(14) 0.0038(14) 0.0267(13)
C3 0.0474(17) 0.0409(16) 0.069(2) 0.0034(15) 0.0024(15) 0.0271(14)
C4 0.0531(19) 0.0471(19) 0.101(3) -0.0023(19) -0.0115(19) 0.0285(17)
C5 0.050(2) 0.0448(19) 0.140(4) 0.008(2) 0.008(2) 0.0225(17)
C6 0.067(3) 0.046(2) 0.170(5) -0.001(3) 0.003(3) 0.023(2)
C7 0.081(3) 0.0322(18) 0.141(4) -0.006(2) 0.004(3) 0.022(2)
C8 0.087(3) 0.052(2) 0.107(3) 0.013(2) 0.014(3) 0.044(2)
C9 0.073(2) 0.057(2) 0.067(2) 0.0135(16) 0.0100(17) 0.0474(19)
C10 0.070(2) 0.0542(19) 0.0548(18) 0.0032(15) -0.0019(16) 0.0427(17)
C11 0.097(3) 0.070(2) 0.058(2) 0.0107(18) 0.010(2) 0.063(2)
C12 0.093(3) 0.109(3) 0.075(2) 0.013(2) 0.014(2) 0.082(3)
C13 0.066(2) 0.092(3) 0.076(2) 0.010(2) 0.0159(19) 0.054(2)
C14 0.0566(19) 0.080(2) 0.0480(17) 0.0096(17) 0.0089(15) 0.0460(19)
C15 0.0454(19) 0.073(2) 0.093(3) -0.012(2) 0.0051(19) 0.0282(19)
C16 0.069(3) 0.145(5) 0.187(6) -0.071(5) -0.042(3) 0.055(3)
C17 0.132(5) 0.076(3) 0.157(5) 0.040(3) 0.070(4) 0.044(3)
C18 0.059(2) 0.0467(19) 0.082(2) 0.0089(16) -0.0109(18) 0.0294(17)
C19 0.111(4) 0.075(3) 0.182(6) -0.043(4) -0.034(4) 0.052(3)
C20 0.137(4) 0.097(3) 0.085(3) -0.011(3) 0.003(3) 0.089(3)
 
 
#----------------------------------------------------------------------------#
#                   MOLECULAR GEOMETRY                                       #
#----------------------------------------------------------------------------#
 
_geom_special_details
;
 All esds (except the esd in the dihedral angle between two l.s. planes)
 are estimated using the full covariance matrix.  The cell esds are taken
 into account individually in the estimation of esds in distances, angles
 and torsion angles; correlations between esds in cell parameters are only
 used when they are defined by crystal symmetry.  An approximate (isotropic)
 treatment of cell esds is used for estimating esds involving l.s. planes.
;
loop_
    _geom_bond_atom_site_label_1
    _geom_bond_atom_site_label_2
    _geom_bond_distance
    _geom_bond_site_symmetry_2
    _geom_bond_publ_flag
O1 C9 1.437(4) . ?
O1 C2 1.443(3) . ?
O2 C3 1.439(4) . ?
O2 H2 0.82 . ?
O3 C6 1.422(6) . ?
O3 H3A 0.9334 . ?
O3 H3B 0.9237 . ?
C1 C2 1.537(4) . ?
C1 C14 1.539(5) . ?
C1 C10 1.548(4) . ?
C1 H1 0.98 . ?
C2 C3 1.547(4) . ?
C2 H2A 0.98 . ?
C3 C18 1.523(4) . ?
C3 C4 1.542(5) . ?
C4 C5 1.532(5) . ?
C4 H4A 0.97 . ?
C4 H4B 0.97 . ?
C5 C6 1.517(5) . ?
C5 H5A 0.97 . ?
C5 H5B 0.97 . ?
C6 C7 1.521(6) . ?
C6 H6 0.98 . ?
C7 C19 1.323(7) . ?
C7 C8 1.508(6) . ?
C8 C9 1.533(5) . ?
C8 H8A 0.97 . ?
C8 H8B 0.97 . ?
C9 C10 1.539(5) . ?
C9 H9 0.98 . ?
C10 C11 1.514(5) . ?
C10 H10 0.98 . ?
C11 C20 1.322(5) . ?
C11 C12 1.506(6) . ?
C12 C13 1.528(6) . ?
C12 H12A 0.97 . ?
C12 H12B 0.97 . ?
C13 C14 1.528(5) . ?
C13 H13A 0.97 . ?
C13 H13B 0.97 . ?
C14 C15 1.551(5) . ?
C14 H14 0.98 . ?
C15 C16 1.528(6) . ?
C15 C17 1.536(6) . ?
C15 H15 0.98 . ?
C16 H16A 0.96 . ?
C16 H16B 0.96 . ?
C16 H16C 0.96 . ?
C17 H17A 0.96 . ?
C17 H17B 0.96 . ?
C17 H17C 0.96 . ?
C18 H18A 0.96 . ?
C18 H18B 0.96 . ?
C18 H18C 0.96 . ?
C19 H19A 0.93 . ?
C19 H19B 0.93 . ?
C20 H20A 0.93 . ?
C20 H20B 0.93 . ?
 
loop_
    _geom_angle_atom_site_label_1
    _geom_angle_atom_site_label_2
    _geom_angle_atom_site_label_3
    _geom_angle
    _geom_angle_site_symmetry_1
    _geom_angle_site_symmetry_3
    _geom_angle_publ_flag
C9 O1 C2 112.5(2) . . ?
C3 O2 H2 109.5 . . ?
C6 O3 H3A 108.5 . . ?
C6 O3 H3B 136.5 . . ?
H3A O3 H3B 114.6 . . ?
C2 C1 C14 110.3(2) . . ?
C2 C1 C10 103.4(3) . . ?
C14 C1 C10 114.5(2) . . ?
C2 C1 H1 109.5 . . ?
C14 C1 H1 109.5 . . ?
C10 C1 H1 109.5 . . ?
O1 C2 C1 104.6(2) . . ?
O1 C2 C3 111.2(2) . . ?
C1 C2 C3 120.5(2) . . ?
O1 C2 H2A 106.6 . . ?
C1 C2 H2A 106.6 . . ?
C3 C2 H2A 106.6 . . ?
O2 C3 C18 104.6(3) . . ?
O2 C3 C4 109.2(3) . . ?
C18 C3 C4 110.2(3) . . ?
O2 C3 C2 107.8(2) . . ?
C18 C3 C2 110.6(3) . . ?
C4 C3 C2 113.9(3) . . ?
C5 C4 C3 115.8(3) . . ?
C5 C4 H4A 108.3 . . ?
C3 C4 H4A 108.3 . . ?
C5 C4 H4B 108.3 . . ?
C3 C4 H4B 108.3 . . ?
H4A C4 H4B 107.4 . . ?
C6 C5 C4 114.6(4) . . ?
C6 C5 H5A 108.6 . . ?
C4 C5 H5A 108.6 . . ?
C6 C5 H5B 108.6 . . ?
C4 C5 H5B 108.6 . . ?
H5A C5 H5B 107.6 . . ?
O3 C6 C5 108.4(4) . . ?
O3 C6 C7 110.3(4) . . ?
C5 C6 C7 116.0(3) . . ?
O3 C6 H6 107.3 . . ?
C5 C6 H6 107.3 . . ?
C7 C6 H6 107.3 . . ?
C19 C7 C8 120.9(5) . . ?
C19 C7 C6 118.5(5) . . ?
C8 C7 C6 120.2(4) . . ?
C7 C8 C9 119.2(3) . . ?
C7 C8 H8A 107.5 . . ?
C9 C8 H8A 107.5 . . ?
C7 C8 H8B 107.5 . . ?
C9 C8 H8B 107.5 . . ?
H8A C8 H8B 107 . . ?
O1 C9 C8 110.3(3) . . ?
O1 C9 C10 105.9(2) . . ?
C8 C9 C10 117.1(3) . . ?
O1 C9 H9 107.7 . . ?
C8 C9 H9 107.7 . . ?
C10 C9 H9 107.7 . . ?
C11 C10 C9 114.0(2) . . ?
C11 C10 C1 115.1(3) . . ?
C9 C10 C1 102.8(2) . . ?
C11 C10 H10 108.2 . . ?
C9 C10 H10 108.2 . . ?
C1 C10 H10 108.2 . . ?
C20 C11 C12 122.5(4) . . ?
C20 C11 C10 121.4(4) . . ?
C12 C11 C10 116.1(3) . . ?
C11 C12 C13 110.1(3) . . ?
C11 C12 H12A 109.6 . . ?
C13 C12 H12A 109.6 . . ?
C11 C12 H12B 109.6 . . ?
C13 C12 H12B 109.6 . . ?
H12A C12 H12B 108.1 . . ?
C14 C13 C12 111.1(3) . . ?
C14 C13 H13A 109.4 . . ?
C12 C13 H13A 109.4 . . ?
C14 C13 H13B 109.4 . . ?
C12 C13 H13B 109.4 . . ?
H13A C13 H13B 108 . . ?
C13 C14 C1 111.2(3) . . ?
C13 C14 C15 112.9(3) . . ?
C1 C14 C15 112.2(3) . . ?
C13 C14 H14 106.7 . . ?
C1 C14 H14 106.7 . . ?
C15 C14 H14 106.7 . . ?
C16 C15 C17 111.2(4) . . ?
C16 C15 C14 111.4(4) . . ?
C17 C15 C14 113.1(3) . . ?
C16 C15 H15 106.9 . . ?
C17 C15 H15 106.9 . . ?
C14 C15 H15 106.9 . . ?
C15 C16 H16A 109.5 . . ?
C15 C16 H16B 109.5 . . ?
H16A C16 H16B 109.5 . . ?
C15 C16 H16C 109.5 . . ?
H16A C16 H16C 109.5 . . ?
H16B C16 H16C 109.5 . . ?
C15 C17 H17A 109.5 . . ?
C15 C17 H17B 109.5 . . ?
H17A C17 H17B 109.5 . . ?
C15 C17 H17C 109.5 . . ?
H17A C17 H17C 109.5 . . ?
H17B C17 H17C 109.5 . . ?
C3 C18 H18A 109.5 . . ?
C3 C18 H18B 109.5 . . ?
H18A C18 H18B 109.5 . . ?
C3 C18 H18C 109.5 . . ?
H18A C18 H18C 109.5 . . ?
H18B C18 H18C 109.5 . . ?
C7 C19 H19A 120 . . ?
C7 C19 H19B 120 . . ?
H19A C19 H19B 120 . . ?
C11 C20 H20A 120 . . ?
C11 C20 H20B 120 . . ?
H20A C20 H20B 120 . . ?
 
loop_
    _geom_torsion_atom_site_label_1
    _geom_torsion_atom_site_label_2
    _geom_torsion_atom_site_label_3
    _geom_torsion_atom_site_label_4
    _geom_torsion
    _geom_torsion_site_symmetry_1
    _geom_torsion_site_symmetry_2
    _geom_torsion_site_symmetry_3
    _geom_torsion_site_symmetry_4
    _geom_torsion_publ_flag
C9 O1 C2 C1 14.9(3) . . . . ?
C9 O1 C2 C3 -116.6(3) . . . . ?
C14 C1 C2 O1 93.5(3) . . . . ?
C10 C1 C2 O1 -29.3(3) . . . . ?
C14 C1 C2 C3 -140.5(3) . . . . ?
C10 C1 C2 C3 96.7(3) . . . . ?
O1 C2 C3 O2 -79.4(3) . . . . ?
C1 C2 C3 O2 157.8(3) . . . . ?
O1 C2 C3 C18 166.8(2) . . . . ?
C1 C2 C3 C18 44.0(4) . . . . ?
O1 C2 C3 C4 42.0(4) . . . . ?
C1 C2 C3 C4 -80.8(4) . . . . ?
O2 C3 C4 C5 48.0(4) . . . . ?
C18 C3 C4 C5 162.4(3) . . . . ?
C2 C3 C4 C5 -72.6(4) . . . . ?
C3 C4 C5 C6 138.0(4) . . . . ?
C4 C5 C6 O3 -176.8(4) . . . . ?
C4 C5 C6 C7 -52.1(6) . . . . ?
O3 C6 C7 C19 -109.4(5) . . . . ?
C5 C6 C7 C19 127.0(5) . . . . ?
O3 C6 C7 C8 64.1(5) . . . . ?
C5 C6 C7 C8 -59.5(6) . . . . ?
C19 C7 C8 C9 -98.9(5) . . . . ?
C6 C7 C8 C9 87.7(5) . . . . ?
C2 O1 C9 C8 133.7(3) . . . . ?
C2 O1 C9 C10 6.0(4) . . . . ?
C7 C8 C9 O1 -71.8(5) . . . . ?
C7 C8 C9 C10 49.4(5) . . . . ?
O1 C9 C10 C11 -149.3(3) . . . . ?
C8 C9 C10 C11 87.2(4) . . . . ?
O1 C9 C10 C1 -24.0(3) . . . . ?
C8 C9 C10 C1 -147.5(3) . . . . ?
C2 C1 C10 C11 156.9(3) . . . . ?
C14 C1 C10 C11 36.9(4) . . . . ?
C2 C1 C10 C9 32.3(3) . . . . ?
C14 C1 C10 C9 -87.7(3) . . . . ?
C9 C10 C11 C20 -103.6(4) . . . . ?
C1 C10 C11 C20 138.0(4) . . . . ?
C9 C10 C11 C12 78.8(4) . . . . ?
C1 C10 C11 C12 -39.6(4) . . . . ?
C20 C11 C12 C13 -126.8(4) . . . . ?
C10 C11 C12 C13 50.8(4) . . . . ?
C11 C12 C13 C14 -60.1(4) . . . . ?
C12 C13 C14 C1 58.5(4) . . . . ?
C12 C13 C14 C15 -174.4(3) . . . . ?
C2 C1 C14 C13 -162.4(3) . . . . ?
C10 C1 C14 C13 -46.3(4) . . . . ?
C2 C1 C14 C15 70.1(3) . . . . ?
C10 C1 C14 C15 -173.9(3) . . . . ?
C13 C14 C15 C16 75.1(4) . . . . ?
C1 C14 C15 C16 -158.3(3) . . . . ?
C13 C14 C15 C17 -51.0(5) . . . . ?
C1 C14 C15 C17 75.6(4) . . . . ?
 
_shelx_res_file
;
TITL C20 H32 O3  APEX data 298 K  Space group P32 2 1
CELL  0.71073  17.4587  17.4587  10.7319   90.000   90.000  120.000
ZERR     6.00   0.0006   0.0006   0.0004    0.000    0.000    0.000
LATT  -1
SYMM  - Y,   X - Y, 2/3 + Z
SYMM  - X + Y, - X, 1/3 + Z
SYMM    X - Y, - Y, 1/3 - Z
SYMM  - X, - X + Y, 2/3 - Z
SYMM    Y,   X, - Z
SFAC  O    C    H
UNIT  18   120  192
MERG   2
FMAP   2
PLAN    5
SIZE     0.100   0.200   0.600
ACTA
BOND   $H
CONF
L.S.  10
TEMP    25.00
WGHT    0.038300    0.660900
FVAR       0.40621
O1    1    0.641042    0.705190    0.116463    11.00000    0.06580    0.05255 =
         0.06241    0.01527    0.01593    0.04158
O2    1    0.710317    0.575747    0.120907    11.00000    0.05984    0.05705 =
         0.08513    0.00637    0.01055    0.04082
AFIX 147
H2    3    0.709664    0.602015    0.057936    11.00000   -1.50000
AFIX   0
O3    1    0.899774    0.913413    0.128896    11.00000    0.10729    0.05260 =
         0.28522    0.05250    0.08891    0.03196
AFIX   3
H3A   3    0.928778    0.971163    0.159631    10.50000   -1.50000
H3B   3    0.904578    0.909063    0.043801    10.50000   -1.50000
AFIX   0
C1    2    0.540448    0.622479    0.275916    11.00000    0.05798    0.05441 =
         0.04392    0.00738    0.00211    0.03888
AFIX  13
H1    3    0.541158    0.591999    0.352214    11.00000   -1.20000
AFIX   0
C2    2    0.606657    0.622195    0.181782    11.00000    0.04841    0.04158 =
         0.04882    0.00771    0.00381    0.02673
AFIX  13
H2A   3    0.571935    0.575570    0.121124    11.00000   -1.20000
AFIX   0
C3    2    0.682118    0.606638    0.226013    11.00000    0.04736    0.04090 =
         0.06909    0.00342    0.00237    0.02706
C4    2    0.762453    0.689700    0.280535    11.00000    0.05311    0.04706 =
         0.10140   -0.00229   -0.01149    0.02850
AFIX  23
H4A   3    0.741112    0.715884    0.341123    11.00000   -1.20000
H4B   3    0.799040    0.671337    0.324764    11.00000   -1.20000
AFIX   0
C5    2    0.820644    0.761128    0.186110    11.00000    0.04986    0.04481 =
         0.13956    0.00795    0.00772    0.02251
AFIX  23
H5A   3    0.872429    0.755960    0.168980    11.00000   -1.20000
H5B   3    0.787980    0.750071    0.108792    11.00000   -1.20000
AFIX   0
C6    2    0.850913    0.855060    0.227706    11.00000    0.06656    0.04639 =
         0.17006   -0.00063    0.00268    0.02343
AFIX  13
H6    3    0.891831    0.868170    0.297511    11.00000   -1.20000
AFIX   0
C7    2    0.778596    0.873036    0.271917    11.00000    0.08064    0.03220 =
         0.14072   -0.00579    0.00416    0.02235
C8    2    0.704262    0.858071    0.185507    11.00000    0.08672    0.05224 =
         0.10726    0.01260    0.01426    0.04417
AFIX  23
H8A   3    0.728525    0.873375    0.101995    11.00000   -1.20000
H8B   3    0.685361    0.899823    0.208357    11.00000   -1.20000
AFIX   0
C9    2    0.621494    0.766154    0.179227    11.00000    0.07345    0.05664 =
         0.06708    0.01349    0.01004    0.04744
AFIX  13
H9    3    0.577055    0.771195    0.129708    11.00000   -1.20000
AFIX   0
C10   2    0.578269    0.721990    0.303810    11.00000    0.06999    0.05423 =
         0.05475    0.00324   -0.00195    0.04270
AFIX  13
H10   3    0.625094    0.740044    0.366346    11.00000   -1.20000
AFIX   0
C11   2    0.511592    0.746270    0.351609    11.00000    0.09670    0.06984 =
         0.05844    0.01065    0.01010    0.06315
C12   2    0.421561    0.698958    0.291610    11.00000    0.09280    0.10886 =
         0.07508    0.01256    0.01400    0.08163
AFIX  23
H12A  3    0.425667    0.719328    0.206475    11.00000   -1.20000
H12B  3    0.381446    0.712266    0.336658    11.00000   -1.20000
AFIX   0
C13   2    0.385604    0.599196    0.292387    11.00000    0.06624    0.09175 =
         0.07577    0.00980    0.01593    0.05414
AFIX  23
H13A  3    0.380100    0.578796    0.377739    11.00000   -1.20000
H13B  3    0.327220    0.569352    0.254937    11.00000   -1.20000
AFIX   0
C14   2    0.446563    0.575655    0.220500    11.00000    0.05660    0.08047 =
         0.04803    0.00963    0.00894    0.04597
AFIX  13
H14   3    0.451580    0.598844    0.135901    11.00000   -1.20000
AFIX   0
C15   2    0.408173    0.474423    0.207708    11.00000    0.04537    0.07285 =
         0.09335   -0.01209    0.00514    0.02825
AFIX  13
H15   3    0.456043    0.465689    0.176630    11.00000   -1.20000
AFIX   0
C16   2    0.334045    0.434439    0.111000    11.00000    0.06902    0.14522 =
         0.18728   -0.07093   -0.04187    0.05504
AFIX 137
H16A  3    0.315015    0.372887    0.100200    11.00000   -1.50000
H16B  3    0.355395    0.464740    0.033040    11.00000   -1.50000
H16C  3    0.285165    0.440577    0.139015    11.00000   -1.50000
AFIX   0
C17   2    0.377948    0.425209    0.332542    11.00000    0.13166    0.07628 =
         0.15668    0.04038    0.07002    0.04400
AFIX 137
H17A  3    0.422716    0.456157    0.394426    11.00000   -1.50000
H17B  3    0.368336    0.366365    0.323034    11.00000   -1.50000
H17C  3    0.323896    0.422339    0.358207    11.00000   -1.50000
AFIX   0
C18   2    0.647567    0.530911    0.319490    11.00000    0.05918    0.04673 =
         0.08207    0.00887   -0.01090    0.02941
AFIX 137
H18A  3    0.592205    0.482975    0.290635    11.00000   -1.50000
H18B  3    0.639141    0.551018    0.398835    11.00000   -1.50000
H18C  3    0.689581    0.511017    0.327907    11.00000   -1.50000
AFIX   0
C19   2    0.787151    0.909939    0.382517    11.00000    0.11099    0.07510 =
         0.18228   -0.04277   -0.03352    0.05238
AFIX  93
H19A  3    0.746988    0.927055    0.407934    11.00000   -1.20000
H19B  3    0.833327    0.918766    0.434853    11.00000   -1.20000
AFIX   0
C20   2    0.530968    0.803321    0.443714    11.00000    0.13731    0.09744 =
         0.08503   -0.01087    0.00283    0.08943
AFIX  93
H20A  3    0.488248    0.815528    0.473801    11.00000   -1.20000
H20B  3    0.587322    0.831260    0.478439    11.00000   -1.20000
AFIX   0
HKLF    4
 
REM  C20 H32 O3  APEX data 298 K  Space group P32 2 1
REM R1 =  0.0509 for    2784 Fo > 4sig(Fo)  and  0.0764 for all    3714 data
REM    212 parameters refined using      0 restraints
 
END
 
WGHT      0.0384      0.6615
 
REM Highest difference peak  0.244,  deepest hole -0.223,  1-sigma level  0.031
Q1    1   0.9080  0.9199  0.1865  11.00000  0.05    0.20
Q2    1   0.6328  0.5274  0.0692  11.00000  0.05    0.12
Q3    1   0.9230  0.9683  0.1004  11.00000  0.05    0.11
Q4    1   0.3528  0.4510  0.4057  11.00000  0.05    0.11
Q5    1   0.3786  0.4614  0.2772  11.00000  0.05    0.10
;
_shelx_res_checksum     32645
 
_shelx_hkl_file
;
   0   0   3 407.927 12.5542   1
   0   0   6 40.0558  1.8594   1
   0   0   9 11.6397 0.86646   1
   0   0  12 12.4146 1.91014   1
   1   0 -13 5.11453  1.2498   1
   1   0 -12  7.9773 1.07613   1
   1   0 -11 0.87184 0.49989   1
   1   0 -10  20.592 0.79051   1
   1   0  -9 15.2772 0.63393   1
   1   0  -8-0.15852 1.32323   1
   1   0  -7 9.03193 0.42083   1
   1   0  -6   38.85 1.26427   1
   1   0  -5 13.1951 0.48747   1
   1   0  -4 106.984 2.82143   1
   1   0  -3 753.104 19.1073   1
   1   0  -2 907.726 23.1225   1
   1   0  -1 872.471 22.6209   1
   1   0   0  6.4336 0.19085   1
   1   0   1 692.639 18.0756   1
   1   0   2 8921.44 235.435   1
   1   0   3 88.8634 2.38648   1
   1   0   4 38.1733  1.1513   1
   1   0   5 122.112 3.38077   1
   1   0   6 1.63191 0.21934   1
   1   0   7 34.7084 1.17956   1
   1   0   8  6.2488 0.42665   1
   1   0   9-0.40462 1.44639   1
   1   0  10  8.2368 0.51134   1
   1   0  11 1.34761 0.65876   1
   1   0  12 1.34001 0.72948   1
   1   0  13 0.04099 1.05959   1
   1   1   0 3742.00 115.982   1
   1   1   1 327.523 8.57461   1
   1   1   2 102.539 2.73951   1
   1   1   3 349.012 9.11492   1
   1   1   4 9.26019 0.35111   1
   1   1   5 67.7566 1.90687   1
   1   1   6  3.1814 0.23284   1
   1   1   7 15.5536 0.53344   1
   1   1   8 3.59097 0.31188   1
   1   1   9 3.20089 0.39476   1
   1   1  10 3.54404 0.41119   1
   1   1  11 2.64256 0.49101   1
   1   1  12 1.68258 1.08354   1
   1   1  13 0.04198 1.07385   1
   2  -1   0 3800.70 114.408   1
   2  -1   1 326.905  8.5301   1
   2  -1   2 102.999 2.85323   1
   2  -1   3 333.581 8.47618   1
   2  -1   4 9.75062 0.35842   1
   2  -1   5  67.589 1.78177   1
   2  -1   6 2.88626 0.24055   1
   2  -1   7  15.793 0.54965   1
   2  -1   8 2.85903 0.30414   1
   2  -1   9 2.97657 0.36234   1
   2  -1  10 2.48862 0.40416   1
   2  -1  11 2.37409  0.4926   1
   2  -1  12 1.08856    0.85   1
   2  -1  13 0.59694 1.36303   1
   2   0 -13 3.34069 1.11129   1
   2   0 -12 1.92431 0.68879   1
   2   0 -11  2.7496 0.50585   1
   2   0 -10 6.24877 0.46673   1
   2   0  -9 0.10353 0.32194   1
   2   0  -8 6.56419 0.42224   1
   2   0  -7 1.11723 0.25945   1
   2   0  -6  1.5929 0.24702   1
   2   0  -5 26.1346 0.73294   1
   2   0  -4 1.68453 0.18726   1
   2   0  -3 88.5999 2.28213   1
   2   0  -2 21.9115 0.63289   1
   2   0  -1 1655.25 43.3771   1
   2   0   0 33.1488 0.91085   1
   2   0   1 42.0657 1.14038   1
   2   0   2 2.62963 0.19504   1
   2   0   3 403.472 10.3034   1
   2   0   4 69.4085  1.8481   1
   2   0   5 30.8002 0.89003   1
   2   0   6 26.6368  0.7946   1
   2   0   7 81.1037 2.20217   1
   2   0   8  2.0475 0.29175   1
   2   0   9 3.04241 0.40042   1
   2   0  10 1.48553 0.48236   1
   2   0  11 1.60867 0.48852   1
   2   0  12  0.1077 0.65364   1
   2   0  13 1.10049 1.00207   1
   2   1 -13 1.76645 1.15155   1
   2   1 -12 0.47851 0.62108   1
   2   1 -11 3.10839 0.54046   1
   2   1 -10 1.09508 0.40841   1
   2   1  -9 2.84227 0.37281   1
   2   1  -8 1.90037 0.28758   1
   2   1  -7 11.1777 0.40861   1
   2   1  -6 2.33087 0.24292   1
   2   1  -5 20.8357 0.63017   1
   2   1  -4 31.2313 1.02664   1
   2   1  -3 201.954  5.1257   1
   2   1  -2 616.644 15.6614   1
   2   1  -1 1099.17 28.5515   1
   2   1   0 346.186 9.28078   1
   2   1   1 128.925 3.47704   1
   2   1   2 178.504 4.71182   1
   2   1   3 76.6006 1.97066   1
   2   1   4 160.077 4.21819   1
   2   1   5 288.637 7.45063   1
   2   1   6 38.9556 1.39907   1
   2   1   7 12.6671 0.51549   1
   2   1   8 9.06803 0.46124   1
   2   1   9 7.03591 0.44116   1
   2   1  10-0.16975 1.69932   1
   2   1  11 1.75973 0.60608   1
   2   1  12 2.25289 0.81833   1
   2   1  13 2.36706 1.39875   1
   2   2   0 614.819 18.4821   1
   2   2   1 925.439  23.829   1
   2   2   2 238.113 6.10878   1
   2   2   3 233.601 6.00385   1
   2   2   4 646.382 16.8069   1
   2   2   5 97.5391 2.58212   1
   2   2   6 29.1047 0.81701   1
   2   2   7 3.17055 0.30371   1
   2   2   8 26.5584 0.87294   1
   2   2   9 13.9401  0.5923   1
   2   2  10 3.67378 0.47901   1
   2   2  11 0.72523 0.52953   1
   2   2  12-0.37583 2.94396   1
   3  -1 -13 0.67006 1.84862   1
   3  -1 -12 0.66775 0.73314   1
   3  -1 -11 3.50834 0.56479   1
   3  -1 -10 1.98223 0.39776   1
   3  -1  -9 3.13797 0.36114   1
   3  -1  -8 2.06355 0.28764   1
   3  -1  -7 11.5434 0.43503   1
   3  -1  -6 2.71046 0.23929   1
   3  -1  -5 21.1149   0.614   1
   3  -1  -4 31.1106 0.91378   1
   3  -1  -3 199.061 4.99375   1
   3  -1  -2 615.999 15.5843   1
   3  -1  -1 1079.86 28.2435   1
   3  -1   0 346.707 9.21668   1
   3  -1   1 132.531  3.4746   1
   3  -1   2 183.477 4.71966   1
   3  -1   3 77.5361 2.30979   1
   3  -1   4 155.885 4.04945   1
   3  -1   5 277.691 7.40839   1
   3  -1   6 37.3461 1.12849   1
   3  -1   7 12.0508 0.44332   1
   3  -1   8 8.90141 0.57013   1
   3  -1   9 6.63019 0.50065   1
   3  -1  10 0.10273 0.37743   1
   3  -1  11 0.88171 0.79043   1
   3  -1  12-0.83486 2.39588   1
   3  -1  13 2.60552  0.9867   1
   3   0 -13-0.06135 3.52905   1
   3   0 -12-0.52193 3.07019   1
   3   0 -11 0.15943 0.51122   1
   3   0 -10 1.26317 0.44401   1
   3   0  -9 1.23994 0.32693   1
   3   0  -8 2.99882 0.30536   1
   3   0  -7 0.27068 0.23546   1
   3   0  -6 17.1045 0.53619   1
   3   0  -5 20.0658  0.5795   1
   3   0  -4 1.17295 0.18003   1
   3   0  -3 136.044 3.41721   1
   3   0  -2 0.78255 0.16515   1
   3   0  -1 2.71518 0.20113   1
   3   0   0 18.2484 0.56054   1
   3   0   1 2.70262  0.2047   1
   3   0   2 286.976 7.47248   1
   3   0   3 65.0803 1.73251   1
   3   0   4  5.7391 0.24823   1
   3   0   5 276.322 7.03135   1
   3   0   6 16.3799 0.66683   1
   3   0   7 6.42995 0.33596   1
   3   0   8 2.79265 0.28602   1
   3   0   9-0.46582 1.36075   1
   3   0  10-0.39876 1.72881   1
   3   0  11 4.93822 0.56687   1
   3   0  12 0.12882 0.93687   1
   3   0  13 0.75982 2.22562   1
   3   1 -12 0.89568 0.64888   1
   3   1 -11 2.43975 0.59703   1
   3   1 -10 22.7002 0.92948   1
   3   1  -9 13.2473 0.68268   1
   3   1  -8 12.1523 0.52568   1
   3   1  -7 14.8894 0.80334   1
   3   1  -6  21.569  0.6554   1
   3   1  -5 41.9207 1.11855   1
   3   1  -4 159.032 4.07163   1
   3   1  -3 6.77484 0.33606   1
   3   1  -2 109.508 2.80208   1
   3   1  -1 1439.31 37.0235   1
   3   1   0 389.675 10.5247   1
   3   1   1 267.465 7.06454   1
   3   1   2 210.309 5.37166   1
   3   1   3 458.627 11.7528   1
   3   1   4 2.71137 0.21003   1
   3   1   5 21.2417 0.81048   1
   3   1   6 12.2938 0.47829   1
   3   1   7 30.1476 1.13204   1
   3   1   8 16.0257 0.90387   1
   3   1   9 4.67441 0.40485   1
   3   1  10-0.06493 1.70805   1
   3   1  11 0.07894 0.62644   1
   3   1  12  0.8623 0.87934   1
   3   2 -12 3.97874 0.88545   1
   3   2 -11  9.8997 0.79343   1
   3   2 -10 2.22394 0.49218   1
   3   2  -9 4.11363 0.44786   1
   3   2  -8 29.8394 1.10252   1
   3   2  -7 66.7401 1.90573   1
   3   2  -6 94.5767 2.45238   1
   3   2  -5  20.743 0.74624   1
   3   2  -4 8.71953 0.33036   1
   3   2  -3  257.25 6.59464   1
   3   2  -2 151.366  3.8779   1
   3   2  -1 745.804 19.0097   1
   3   2   0 1203.35 31.0742   1
   3   2   1 114.914 2.98415   1
   3   2   2 205.322 5.31576   1
   3   2   3 296.967 7.57817   1
   3   2   4 18.2581 0.59212   1
   3   2   5 87.6678 2.35529   1
   3   2   6 44.7029 1.26621   1
   3   2   7 3.38808 0.39188   1
   3   2   8 1.81148 0.33045   1
   3   2   9 3.25956 0.38688   1
   3   2  10  14.748 0.76896   1
   3   2  11   4.267 0.70187   1
   3   2  12 1.94367 0.72302   1
   3   3   0 34.5373 1.23598   1
   3   3   1 660.124 17.4384   1
   3   3   2 204.668 5.24777   1
   3   3   3 62.6377 1.80903   1
   3   3   4 52.4718 1.38121   1
   3   3   5 159.655 4.60527   1
   3   3   6 2.16043 0.24795   1
   3   3   7  46.329 1.30341   1
   3   3   8 2.15487 0.39794   1
   3   3   9 10.5036 0.63839   1
   3   3  10 6.02021 0.56412   1
   3   3  11 2.30422 0.72718   1
   3   3  12 1.82546 0.90326   1
   4  -2   0 612.675 18.1484   1
   4  -2   1 910.229 23.7579   1
   4  -2   2 235.534 5.96154   1
   4  -2   3 236.943 6.10895   1
   4  -2   4 663.835 17.1924   1
   4  -2   5 97.5811 2.55082   1
   4  -2   6 29.0668 0.87946   1
   4  -2   7 3.41536 0.28354   1
   4  -2   8 27.1606 1.02159   1
   4  -2   9 13.8484  0.6241   1
   4  -2  10 3.40703 0.43965   1
   4  -2  11-0.76565 1.96952   1
   4  -2  12-0.96046 2.71088   1
   4  -1 -12 0.30896  1.0409   1
   4  -1 -11 2.47496 0.55359   1
   4  -1 -10 22.4104 0.88236   1
   4  -1  -9 14.1116 0.58126   1
   4  -1  -8 11.5243 0.51018   1
   4  -1  -7 15.7318 0.65453   1
   4  -1  -6 21.9599 0.63839   1
   4  -1  -5 42.0934 1.10078   1
   4  -1  -4 156.928 4.30522   1
   4  -1  -3 6.71691  0.3392   1
   4  -1  -2 108.567 2.78912   1
   4  -1  -1 1432.16 36.7941   1
   4  -1   0 406.927 10.6279   1
   4  -1   1 272.874 7.28733   1
   4  -1   2 211.533 5.37626   1
   4  -1   3 477.345 11.9501   1
   4  -1   4 3.19473 0.25915   1
   4  -1   5 21.2798 0.90367   1
   4  -1   6 12.0616 0.52536   1
   4  -1   7 31.8724 0.93805   1
   4  -1   8 16.8504 0.82074   1
   4  -1   9 3.64392 0.35441   1
   4  -1  10 0.55305 0.50056   1
   4  -1  11 -0.2694 2.68131   1
   4  -1  12 2.20304 0.74875   1
   4   0 -12 5.31597 0.84605   1
   4   0 -11 20.2661 1.04173   1
   4   0 -10 4.77719 0.48905   1
   4   0  -9-0.32446 1.56683   1
   4   0  -8 33.4449 1.15522   1
   4   0  -7 67.9493  1.9006   1
   4   0  -6 39.2369 1.04696   1
   4   0  -5 13.7978 0.45311   1
   4   0  -4 61.6453  1.5804   1
   4   0  -3  402.53 10.1062   1
   4   0  -2 307.865 7.78577   1
   4   0  -1 35.0818 0.99417   1
   4   0   0 1419.25   36.07   1
   4   0   1  209.13 5.38925   1
   4   0   2 141.004  3.6065   1
   4   0   3 16.3734 0.52489   1
   4   0   4 124.066 3.15844   1
   4   0   5 125.361 3.16798   1
   4   0   6 138.472 3.68174   1
   4   0   7  2.8183  0.3073   1
   4   0   8 0.34742 0.28573   1
   4   0   9 0.48887 0.33498   1
   4   0  10 13.3691 0.72427   1
   4   0  11 0.60299 0.60394   1
   4   0  12 2.03024 0.94231   1
   4   1 -12 2.79985 0.98036   1
   4   1 -11 1.61101 0.65039   1
   4   1 -10 4.47123 0.54487   1
   4   1  -9 26.0105 1.11049   1
   4   1  -8 23.6819 0.88324   1
   4   1  -7 8.86192 0.43327   1
   4   1  -6 54.8997 1.48109   1
   4   1  -5 25.6712 0.74476   1
   4   1  -4 6.75512 0.30153   1
   4   1  -3 5.94215 0.26946   1
   4   1  -2 137.034 3.47546   1
   4   1  -1 85.0931 2.34434   1
   4   1   0 91.5771  2.3991   1
   4   1   1 1079.13 28.1162   1
   4   1   2 376.522 9.69807   1
   4   1   3 190.911 4.85755   1
   4   1   4  457.73 11.8638   1
   4   1   5 178.258 5.00695   1
   4   1   6 18.4662 0.65062   1
   4   1   7 5.34841 0.36314   1
   4   1   8 1.39022  0.3136   1
   4   1   9 8.80542  0.5069   1
   4   1  10-0.44293 1.75794   1
   4   1  11  3.8146 0.72344   1
   4   1  12 2.00035 0.94346   1
   4   2 -12 0.96747 0.86903   1
   4   2 -11 1.16898 0.64616   1
   4   2 -10 9.33763 0.71286   1
   4   2  -9 0.07674 0.43885   1
   4   2  -8 3.30608 0.34992   1
   4   2  -7 6.77294 0.35674   1
   4   2  -6 28.0222 0.93389   1
   4   2  -5 76.2293 2.16338   1
   4   2  -4 11.0344 0.43933   1
   4   2  -3 168.131 4.35746   1
   4   2  -2 8.38118 0.37881   1
   4   2  -1 181.892 4.65792   1
   4   2   0 206.096 5.37347   1
   4   2   1 197.355 5.05129   1
   4   2   2 362.885 9.64515   1
   4   2   3 812.284 21.4474   1
   4   2   4 11.4102 0.44302   1
   4   2   5 17.7583 0.65948   1
   4   2   6 59.1476 1.56922   1
   4   2   7 15.6995 0.55521   1
   4   2   8 33.0842  1.1308   1
   4   2   9 12.5867 0.68528   1
   4   2  10 1.61753 0.47175   1
   4   2  11 0.14793 0.63628   1
   4   2  12 3.55295 0.95264   1
   4   3 -12 2.55034 1.27628   1
   4   3 -11 5.32814 0.73254   1
   4   3 -10 0.52529 0.48419   1
   4   3  -9  18.466 0.90568   1
   4   3  -8 28.1876  0.9506   1
   4   3  -7 2.77575 0.32807   1
   4   3  -6 0.12547 0.23986   1
   4   3  -5  72.312 1.90215   1
   4   3  -4 7.32786 0.39128   1
   4   3  -3 564.739  15.166   1
   4   3  -2 599.487  16.086   1
   4   3  -1 21.5605 0.68156   1
   4   3   0 62.4107 1.73755   1
   4   3   1  8.5523 0.35692   1
   4   3   2 31.7629 1.07263   1
   4   3   3 37.5621 1.13858   1
   4   3   4  57.445   1.533   1
   4   3   5 32.0858 1.01942   1
   4   3   6 27.0569 0.86791   1
   4   3   7 1.80192  0.2785   1
   4   3   8-0.22578 1.44503   1
   4   3   9 22.3564 0.94186   1
   4   3  10 5.44505 0.59065   1
   4   3  11-0.27973 2.48262   1
   4   3  12-0.73275 4.03634   1
   4   4   0 41.3172 1.48597   1
   4   4   1 463.425 12.4754   1
   4   4   2 134.081 3.50266   1
   4   4   3 35.8622 1.07477   1
   4   4   4 73.1286 1.88409   1
   4   4   5 30.9051 0.93885   1
   4   4   6 6.61458 0.42262   1
   4   4   7 29.7474 1.13715   1
   4   4   8 16.2602 0.71243   1
   4   4   9 12.6262   0.741   1
   4   4  10 1.62885 0.62081   1
   4   4  11 1.79649 0.71199   1
   4   4  12-0.25575 3.11693   1
   5  -2 -12 5.31346 1.07668   1
   5  -2 -11 9.37561  0.9023   1
   5  -2 -10 2.08791  0.4325   1
   5  -2  -9 4.44312 0.41012   1
   5  -2  -8 29.7595 1.12215   1
   5  -2  -7 68.4675 1.78747   1
   5  -2  -6 91.3855 2.42054   1
   5  -2  -5 20.7989 0.69528   1
   5  -2  -4 8.99887 0.41413   1
   5  -2  -3 254.064 6.47349   1
   5  -2  -2 150.056 3.94929   1
   5  -2  -1 722.849 18.8861   1
   5  -2   0 1246.58 31.9339   1
   5  -2   1 113.038 3.01331   1
   5  -2   2 217.349 5.51585   1
   5  -2   3 295.972 7.74077   1
   5  -2   4  19.208 0.57529   1
   5  -2   5 87.6178 2.34933   1
   5  -2   6 44.8387  1.4134   1
   5  -2   7 3.21269 0.29833   1
   5  -2   8 0.97935 0.30232   1
   5  -2   9 2.78584 0.37745   1
   5  -2  10 15.5362  0.7728   1
   5  -2  11 4.12971 0.72644   1
   5  -2  12 3.31592 0.80997   1
   5  -1 -12 4.38209 0.87401   1
   5  -1 -11  0.5166 0.55773   1
   5  -1 -10 5.91288 0.53013   1
   5  -1  -9 25.9772 1.01581   1
   5  -1  -8  21.949 1.07379   1
   5  -1  -7 8.43104 0.41535   1
   5  -1  -6 54.9985 1.66031   1
   5  -1  -5 26.7366 0.77317   1
   5  -1  -4 6.82008 0.36942   1
   5  -1  -3 5.79881  0.2671   1
   5  -1  -2 131.602 3.50072   1
   5  -1  -1 83.9367 2.23731   1
   5  -1   0 92.2854 2.39265   1
   5  -1   1 1092.84 28.4627   1
   5  -1   2 385.991 9.77737   1
   5  -1   3 188.109   4.803   1
   5  -1   4 460.057 11.7682   1
   5  -1   5 184.323 5.31487   1
   5  -1   6 17.0794 0.69012   1
   5  -1   7 5.47815 0.33024   1
   5  -1   8 1.04001 0.36752   1
   5  -1   9 8.42377 0.54841   1
   5  -1  10  0.5295 0.45465   1
   5  -1  11  4.9423 0.69371   1
   5  -1  12-0.10593 2.59647   1
   5   0 -12 2.68526 0.97718   1
   5   0 -11 1.37322 0.81598   1
   5   0 -10  15.348 0.79889   1
   5   0  -9 3.40381 0.50937   1
   5   0  -8 0.95156 0.27865   1
   5   0  -7-0.38028 1.14489   1
   5   0  -6  18.141 0.66411   1
   5   0  -5 99.7284 2.59045   1
   5   0  -4 11.7183 0.40022   1
   5   0  -3 64.7534  1.6837   1
   5   0  -2 76.5143 1.98208   1
   5   0  -1 158.548 4.05635   1
   5   0   0 172.171 4.43407   1
   5   0   1 377.247 9.65868   1
   5   0   2 1072.86 28.6632   1
   5   0   3  283.26 7.26642   1
   5   0   4 0.76575 0.22474   1
   5   0   5 31.1161 0.89257   1
   5   0   6  50.817   1.575   1
   5   0   7 0.26368 0.22665   1
   5   0   8 6.09986 0.41703   1
   5   0   9 18.4228 0.84962   1
   5   0  10 1.22471   0.591   1
   5   0  11 0.46236  0.7933   1
   5   0  12-1.24115 2.59349   1
   5   1 -12 2.28574 1.13935   1
   5   1 -11 3.42797 0.72301   1
   5   1 -10 5.60751 0.68942   1
   5   1  -9 6.88825 0.63011   1
   5   1  -8  64.338 1.76972   1
   5   1  -7 40.0439 1.12466   1
   5   1  -6 20.2755 0.66341   1
   5   1  -5 22.4669 0.71261   1
   5   1  -4  26.239 0.88861   1
   5   1  -3 63.0147 1.82982   1
   5   1  -2 185.807 4.87491   1
   5   1  -1 67.3849 1.81989   1
   5   1   0 1.16786 0.21077   1
   5   1   1 41.4539 1.20426   1
   5   1   2 92.6116 2.54689   1
   5   1   3 60.5362 1.61682   1
   5   1   4 8.02214 0.38716   1
   5   1   5  61.063 1.58129   1
   5   1   6 87.6817 2.28477   1
   5   1   7 3.18271 0.32155   1
   5   1   8 1.81644 0.42468   1
   5   1   9-0.54284 1.63221   1
   5   1  10 8.15433 0.62198   1
   5   1  11 0.91617 0.63972   1
   5   1  12 1.74998 0.97407   1
   5   2 -12  1.0136 0.96286   1
   5   2 -11 0.35682 0.66563   1
   5   2 -10 7.70145  0.7062   1
   5   2  -9 0.45132 0.40659   1
   5   2  -8 14.4713 0.63108   1
   5   2  -7 45.1511 1.26748   1
   5   2  -6 22.7818   0.772   1
   5   2  -5 71.0361 1.86636   1
   5   2  -4 193.234 5.23539   1
   5   2  -3 32.4235   1.065   1
   5   2  -2 125.941 3.64493   1
   5   2  -1 212.883 5.51124   1
   5   2   0 82.7756 2.44012   1
   5   2   1 343.954  9.0143   1
   5   2   2 206.237 5.42947   1
   5   2   3 7.25424 0.45517   1
   5   2   4 45.0539 1.29054   1
   5   2   5 148.277 3.88219   1
   5   2   6 1.78673 0.27074   1
   5   2   7  13.447 0.66539   1
   5   2   8 5.76168 0.48006   1
   5   2   9 5.15581 0.55524   1
   5   2  10 1.88766 0.52835   1
   5   2  11 3.79237 0.73524   1
   5   2  12 0.17507 1.07053   1
   5   3 -12 2.44388 1.07027   1
   5   3 -11-0.83369 2.73538   1
   5   3 -10 3.86079 0.64975   1
   5   3  -9 22.8799 0.96266   1
   5   3  -8 3.47652 0.40747   1
   5   3  -7 29.4886 0.96335   1
   5   3  -6 1.34985 0.31777   1
   5   3  -5 26.0593 0.85274   1
   5   3  -4 26.5511 0.80726   1
   5   3  -3 54.4889  1.6975   1
   5   3  -2   59.79 1.69448   1
   5   3  -1 37.0054 1.05021   1
   5   3   0 165.713 4.60176   1
   5   3   1 66.4483 1.93308   1
   5   3   2 123.856 3.75334   1
   5   3   3 309.083 8.37736   1
   5   3   4 5.85273 0.32168   1
   5   3   5  42.465 1.17314   1
   5   3   6 28.0785 0.87111   1
   5   3   7 19.2418 0.72542   1
   5   3   8 3.83729  0.4252   1
   5   3   9 10.7079 0.67511   1
   5   3  10 0.28126 0.56414   1
   5   3  11 2.61272 0.83677   1
   5   3  12  3.3035  1.1409   1
   5   4 -12  0.0915 1.16884   1
   5   4 -11 1.78791 0.87271   1
   5   4 -10 3.23054 0.87786   1
   5   4  -9 11.7628 0.78685   1
   5   4  -8 0.62932 0.39699   1
   5   4  -7 76.8258 2.20079   1
   5   4  -6 11.0998 0.48531   1
   5   4  -5 1.12871 0.24765   1
   5   4  -4 14.3202 0.51561   1
   5   4  -3 32.6142  0.9535   1
   5   4  -2 261.685 7.18432   1
   5   4  -1 17.8069 0.66044   1
   5   4   0  53.074 1.55963   1
   5   4   1  97.928  2.7596   1
   5   4   2 55.2385 1.89649   1
   5   4   3  78.927 2.13116   1
   5   4   4 2.78265 0.28216   1
   5   4   5 48.5518 1.35421   1
   5   4   6 9.78284  0.4295   1
   5   4   7 19.5521  0.7917   1
   5   4   8 3.61889 0.53595   1
   5   4   9  3.8723 0.53463   1
   5   4  10 0.75847 0.76188   1
   5   4  11 3.46566 1.01236   1
   5   4  12 1.60079 1.04944   1
   5   5   0 24.8591 0.95838   1
   5   5   1 16.7481 0.75827   1
   5   5   2 28.5332 0.89694   1
   5   5   3 15.0234 0.62736   1
   5   5   4 12.2291 0.48951   1
   5   5   5 32.5524 1.02076   1
   5   5   6 11.3419   0.546   1
   5   5   7 11.2456 0.58997   1
   5   5   8 6.21019 0.55988   1
   5   5   9 5.52734 0.71618   1
   5   5  10  2.8877 0.79257   1
   5   5  11 1.98246 1.13935   1
   6  -3   0 34.6747 1.18506   1
   6  -3   1  654.03 17.3198   1
   6  -3   2 205.149 5.31491   1
   6  -3   3 61.7945 1.85849   1
   6  -3   4 51.6408 1.37405   1
   6  -3   5 164.468  4.3789   1
   6  -3   6 1.95736 0.23178   1
   6  -3   7 45.1868 1.36046   1
   6  -3   8 2.31097 0.38053   1
   6  -3   9 10.1532 0.56956   1
   6  -3  10 5.71742 0.56856   1
   6  -3  11 2.11588 0.66766   1
   6  -3  12 0.41665 0.82915   1
   6  -2 -12 0.75924 1.07762   1
   6  -2 -11 1.12437 0.59639   1
   6  -2 -10 8.77587 0.67202   1
   6  -2  -9 1.32571 0.40816   1
   6  -2  -8 3.97397  0.3932   1
   6  -2  -7 6.53274 0.32242   1
   6  -2  -6   26.30 0.94337   1
   6  -2  -5 77.9038 2.16998   1
   6  -2  -4 10.6518 0.41775   1
   6  -2  -3 168.161 4.40204   1
   6  -2  -2  8.7403  0.3573   1
   6  -2  -1 181.531 4.65563   1
   6  -2   0 208.355 5.42241   1
   6  -2   1 189.419 4.93028   1
   6  -2   2 362.937  9.5167   1
   6  -2   3 814.909 21.4743   1
   6  -2   4 11.3496 0.39042   1
   6  -2   5 18.4549 0.73455   1
   6  -2   6 58.2595 1.61045   1
   6  -2   7 15.7395  0.5165   1
   6  -2   8 34.3603 1.25657   1
   6  -2   9 11.7259 0.63483   1
   6  -2  10 0.12528 0.50524   1
   6  -2  11 1.25552 0.64404   1
   6  -2  12 3.97091 0.93728   1
   6  -1 -12 0.92242 0.89162   1
   6  -1 -11 3.92159 0.68027   1
   6  -1 -10 5.94297 0.66152   1
   6  -1  -9 7.00859 0.47827   1
   6  -1  -8 63.9021 1.79571   1
   6  -1  -7 40.0028 1.10394   1
   6  -1  -6 22.0391 0.90474   1
   6  -1  -5 22.2899 0.67826   1
   6  -1  -4 27.1667 0.97853   1
   6  -1  -3 62.9411 1.74922   1
   6  -1  -2 190.318 5.16999   1
   6  -1  -1 69.1102 1.87651   1
   6  -1   0 1.63562 0.21574   1
   6  -1   1 41.6905 1.13634   1
   6  -1   2 92.0762 2.86611   1
   6  -1   3  60.693 1.60694   1
   6  -1   4 7.73424 0.34863   1
   6  -1   5 60.2384 1.69737   1
   6  -1   6 87.0556 2.41541   1
   6  -1   7  2.9669 0.26903   1
   6  -1   8 1.74523 0.37495   1
   6  -1   9 0.33972 0.45673   1
   6  -1  10 9.63482 0.69439   1
   6  -1  11 0.13447 0.74409   1
   6  -1  12-2.11133 3.49718   1
   6   0 -12 8.01914  1.3252   1
   6   0 -11-0.47978 2.37672   1
   6   0 -10 12.6337 0.81494   1
   6   0  -9 3.46072 0.45028   1
   6   0  -8 0.49203 0.34234   1
   6   0  -7 36.1462 1.09802   1
   6   0  -6 0.55159 0.24049   1
   6   0  -5 45.2372 1.49168   1
   6   0  -4 1.50589 0.22673   1
   6   0  -3 0.58226 0.19741   1
   6   0  -2 42.8105 1.16668   1
   6   0  -1  435.98 11.4269   1
   6   0   0 1081.96  29.005   1
   6   0   1 261.954 6.81905   1
   6   0   2 70.1195 1.95844   1
   6   0   3 141.063 3.66727   1
   6   0   4 329.739 8.89299   1
   6   0   5 627.909 16.8207   1
   6   0   6 4.28757 0.28357   1
   6   0   7 2.78531 0.34609   1
   6   0   8 0.46766 0.35137   1
   6   0   9 1.77092 0.44918   1
   6   0  10 2.83815 0.58729   1
   6   0  11 0.29002 0.95671   1
   6   0  12 0.73275 1.11747   1
   6   1 -12 1.27443 1.43977   1
   6   1 -11 2.56166 0.75308   1
   6   1 -10 8.45633 0.77048   1
   6   1  -9 6.84594 0.64179   1
   6   1  -8 7.64774 0.56568   1
   6   1  -7 10.8535 0.48538   1
   6   1  -6  9.0163 0.43058   1
   6   1  -5 0.23386 0.23409   1
   6   1  -4 98.8159 2.89723   1
   6   1  -3  22.077 0.74344   1
   6   1  -2 184.043 4.78366   1
   6   1  -1 137.337 3.82406   1
   6   1   0 86.0143 2.29471   1
   6   1   1 81.5192 2.17327   1
   6   1   2 295.327 7.74199   1
   6   1   3 598.791 16.1563   1
   6   1   4 24.4145 1.11305   1
   6   1   5  5.0714 0.29895   1
   6   1   6 49.7802  1.3518   1
   6   1   7 12.3295 0.50822   1
   6   1   8 5.07501 0.46911   1
   6   1   9 12.7648 0.84309   1
   6   1  10 4.30702  0.6014   1
   6   1  11 1.92794 0.73249   1
   6   1  12 1.95785 1.03489   1
   6   2 -12 2.91372 1.66928   1
   6   2 -11 7.57773 1.06945   1
   6   2 -10 1.23511 0.62853   1
   6   2  -9 3.75985 0.51123   1
   6   2  -8 12.7751 0.61331   1
   6   2  -7 28.0088 0.91089   1
   6   2  -6 1.91584 0.27567   1
   6   2  -5 10.9923 0.42336   1
   6   2  -4 17.8963 0.67753   1
   6   2  -3 0.60179 0.22496   1
   6   2  -2 204.651 5.45748   1
   6   2  -1 13.1718 0.52469   1
   6   2   0 12.7942 0.50757   1
   6   2   1 144.619 3.81087   1
   6   2   2 1.27972 0.26328   1
   6   2   3 86.3108 2.48148   1
   6   2   4 3.06667 0.30602   1
   6   2   5 21.2623 0.67401   1
   6   2   6  13.541 0.51465   1
   6   2   7 24.3865 1.04147   1
   6   2   8 11.3348 0.59487   1
   6   2   9 0.70688 0.47038   1
   6   2  10 1.98499 0.82596   1
   6   2  11 0.88049 0.70694   1
   6   2  12 0.10145 0.92792   1
   6   3 -11 3.05883 0.97392   1
   6   3 -10 -0.8013 2.39435   1
   6   3  -9 13.5178 0.79707   1
   6   3  -8 9.93681 0.55928   1
   6   3  -7 34.2152 1.33838   1
   6   3  -6  48.353 1.37989   1
   6   3  -5 0.88901 0.25301   1
   6   3  -4 8.75172 0.42704   1
   6   3  -3 15.8577 0.61676   1
   6   3  -2  74.189 2.03892   1
   6   3  -1 84.9694 2.24336   1
   6   3   0 125.828 3.41015   1
   6   3   1 167.042 4.51786   1
   6   3   2 145.872  3.9526   1
   6   3   3 64.1273 2.02261   1
   6   3   4 91.3247 2.41716   1
   6   3   5 18.1536 0.68214   1
   6   3   6 4.27212 0.35294   1
   6   3   7 2.57596 0.37747   1
   6   3   8 31.4977 1.09609   1
   6   3   9-0.61363 1.86104   1
   6   3  10 2.03875 0.67438   1
   6   3  11 2.62156 0.85315   1
   6   4 -11 0.61353 1.37574   1
   6   4 -10-0.04564 2.57446   1
   6   4  -9 2.88588 0.59629   1
   6   4  -8  4.9843 0.53051   1
   6   4  -7-0.36295 1.47549   1
   6   4  -6 2.60718 0.35709   1
   6   4  -5 49.0519 1.55571   1
   6   4  -4 6.84852 0.41556   1
   6   4  -3 1.97919 0.27365   1
   6   4  -2 30.7847 0.92702   1
   6   4  -1 4.49488  0.2962   1
   6   4   0 28.2482 1.11552   1
   6   4   1 62.9321 1.81047   1
   6   4   2 47.0467 1.37242   1
   6   4   3 2.81066 0.31851   1
   6   4   4 105.792 3.03589   1
   6   4   5  18.153 0.60046   1
   6   4   6 20.1709 0.72285   1
   6   4   7 2.84272 0.43199   1
   6   4   8 16.4365 0.76784   1
   6   4   9 5.48776 0.63387   1
   6   4  10 2.26033 1.00195   1
   6   4  11 1.91686 0.96795   1
   6   5 -11 0.38662 1.09152   1
   6   5 -10 1.95866 1.10477   1
   6   5  -9 4.93785 0.70795   1
   6   5  -8-0.29877 1.77241   1
   6   5  -7 13.2454 0.65092   1
   6   5  -6 6.51722 0.45204   1
   6   5  -5 45.2257  1.5486   1
   6   5  -4 17.9329 0.76832   1
   6   5  -3  14.974 0.61726   1
   6   5  -2 3.46182  0.2975   1
   6   5  -1 19.9657 0.63996   1
   6   5   0 3.33571 0.29483   1
   6   5   1  24.473 0.78774   1
   6   5   2 79.3327  2.1492   1
   6   5   3 14.5114 0.57469   1
   6   5   4 0.37495 0.31413   1
   6   5   5 2.13695 0.35996   1
   6   5   6 5.03239 0.42636   1
   6   5   7 4.19289 0.46453   1
   6   5   8 1.21565 0.48967   1
   6   5   9 0.46368 0.81574   1
   6   5  10 0.53246 0.78462   1
   6   5  11 1.32961 0.98114   1
   6   6   0 16.4471 0.86529   1
   6   6   1-0.19325 1.38745   1
   6   6   2 47.7225 1.58485   1
   6   6   3 43.9059 1.32133   1
   6   6   4 14.0521 0.61573   1
   6   6   5 109.087 3.08507   1
   6   6   6 17.4272 0.88919   1
   6   6   7  23.738 0.97608   1
   6   6   8 0.92971 0.61258   1
   6   6   9 3.37093 0.73247   1
   6   6  10 1.14821 0.85023   1
   7  -3 -12 1.07031 1.14586   1
   7  -3 -11 4.92784 0.78147   1
   7  -3 -10 0.75117 0.50412   1
   7  -3  -9 19.0054 0.95832   1
   7  -3  -8 29.5259 1.05471   1
   7  -3  -7 2.64493 0.29506   1
   7  -3  -6 0.24331 0.22042   1
   7  -3  -5 70.5833 2.01736   1
   7  -3  -4 7.07782 0.35181   1
   7  -3  -3  556.94 14.6993   1
   7  -3  -2 584.071 16.6746   1
   7  -3  -1 21.8302   0.689   1
   7  -3   0 61.8682  1.6956   1
   7  -3   1 9.15761 0.39294   1
   7  -3   2 31.8504 1.10189   1
   7  -3   3 39.1077 1.24347   1
   7  -3   4 56.0281 1.57129   1
   7  -3   5 32.8013  0.9977   1
   7  -3   6  26.974 0.92959   1
   7  -3   7 1.43723 0.25473   1
   7  -3   8 0.04751  0.3547   1
   7  -3   9 22.3117 0.94676   1
   7  -3  10 5.70518 0.63648   1
   7  -3  11 1.34536 0.83635   1
   7  -3  12 0.64933  0.8591   1
   7  -2 -12 0.87272 0.93682   1
   7  -2 -11  0.8848 0.66233   1
   7  -2 -10 8.21229 0.72582   1
   7  -2  -9 0.89416 0.42024   1
   7  -2  -8 12.3524 0.69457   1
   7  -2  -7 45.4829 1.27954   1
   7  -2  -6 22.6659 0.90364   1
   7  -2  -5 70.9213 1.96908   1
   7  -2  -4 195.634 5.07524   1
   7  -2  -3 33.3698 1.03901   1
   7  -2  -2 122.835 3.29638   1
   7  -2  -1  210.36 5.44414   1
   7  -2   0 82.3926 2.30108   1
   7  -2   1 343.568 9.03546   1
   7  -2   2 210.831 5.51183   1
   7  -2   3 7.59816 0.35991   1
   7  -2   4 45.8384 1.24209   1
   7  -2   5 144.212 3.71689   1
   7  -2   6 2.37692 0.31114   1
   7  -2   7 14.0526 0.59458   1
   7  -2   8 5.59354 0.49494   1
   7  -2   9 5.48822 0.51095   1
   7  -2  10 1.86213 0.56698   1
   7  -2  11  2.9855 0.80602   1
   7  -2  12  0.9018 1.13125   1
   7  -1 -12 3.83024 1.24476   1
   7  -1 -11-0.27647  3.7046   1
   7  -1 -10 8.49018  0.8058   1
   7  -1  -9 6.06087 0.54517   1
   7  -1  -8 6.96237 0.55189   1
   7  -1  -7 11.2834 0.48606   1
   7  -1  -6 9.56113 0.42396   1
   7  -1  -5 0.45954 0.23582   1
   7  -1  -4 102.365 2.68033   1
   7  -1  -3 22.6068 0.67584   1
   7  -1  -2 177.696  4.7468   1
   7  -1  -1 136.321 3.80632   1
   7  -1   0 84.8367 2.25058   1
   7  -1   1 80.6415 2.19538   1
   7  -1   2 296.669 7.96346   1
   7  -1   3 592.301 15.7591   1
   7  -1   4  23.978 1.00011   1
   7  -1   5 5.07728  0.3037   1
   7  -1   6 49.1931 1.33707   1
   7  -1   7  10.651 0.59634   1
   7  -1   8 4.49181 0.43307   1
   7  -1   9 12.7821 0.70185   1
   7  -1  10  4.0514 0.59392   1
   7  -1  11 2.93775 0.89792   1
   7  -1  12 1.22592 0.98457   1
   7   0 -12 5.11515 1.13579   1
   7   0 -11 3.45184 0.85722   1
   7   0 -10 3.69212  0.6999   1
   7   0  -9 0.42769 0.47649   1
   7   0  -8 31.6798 1.11192   1
   7   0  -7  25.599 0.98044   1
   7   0  -6 12.5359 0.52259   1
   7   0  -5  4.5442 0.32688   1
   7   0  -4 127.949 3.26363   1
   7   0  -3 0.00666 0.22217   1
   7   0  -2  9.8251 0.38877   1
   7   0  -1 112.255 2.92389   1
   7   0   0 242.772 6.34628   1
   7   0   1 81.5978  2.3188   1
   7   0   2  4.2788 0.29442   1
   7   0   3 262.888 6.88576   1
   7   0   4 175.321 4.58704   1
   7   0   5 0.92456 0.23719   1
   7   0   6 20.7031 0.64451   1
   7   0   7 0.62122 0.34618   1
   7   0   8 13.5736 0.64966   1
   7   0   9 10.6829 0.65318   1
   7   0  10 1.26673 0.58819   1
   7   0  11-1.13119 2.27266   1
   7   0  12 1.75168 0.92263   1
   7   1 -12 2.54141 1.35383   1
   7   1 -11 4.62521 0.93956   1
   7   1 -10 0.99643  0.6334   1
   7   1  -9 8.85563  0.6587   1
   7   1  -8  3.5815  0.4042   1
   7   1  -7 5.48297  0.4004   1
   7   1  -6 68.0097 1.80822   1
   7   1  -5 5.98201 0.34806   1
   7   1  -4 17.5726 0.71956   1
   7   1  -3 2.85461 0.25461   1
   7   1  -2 1.97827 0.25874   1
   7   1  -1 145.579 3.93791   1
   7   1   0 25.6362 0.77506   1
   7   1   1 203.837 5.59709   1
   7   1   2 67.7321 2.09363   1
   7   1   3 220.432 5.80956   1
   7   1   4 20.7726 0.76299   1
   7   1   5 8.90772 0.43179   1
   7   1   6 4.81473 0.36405   1
   7   1   7 2.87619 0.36031   1
   7   1   8 20.5983 0.86188   1
   7   1   9 7.30171 0.62228   1
   7   1  10-0.47243 2.58093   1
   7   1  11 1.02289 0.77845   1
   7   1  12 2.87918 1.22842   1
   7   2 -11  0.0751 0.98212   1
   7   2 -10 3.04289 0.71082   1
   7   2  -9 25.4232 1.14529   1
   7   2  -8 6.56128 0.51951   1
   7   2  -7 1.03444 0.36138   1
   7   2  -6  19.157 0.81695   1
   7   2  -5 24.4206 0.75649   1
   7   2  -4 20.5082  0.7104   1
   7   2  -3 8.70706  0.3816   1
   7   2  -2 84.7844 2.29818   1
   7   2  -1 7.97156 0.36258   1
   7   2   0 45.9155  1.3464   1
   7   2   1 290.653 7.84347   1
   7   2   2 106.634 2.85406   1
   7   2   3 107.892 3.18316   1
   7   2   4 41.1757 1.25717   1
   7   2   5 20.2278 0.72113   1
   7   2   6 44.3291 1.39567   1
   7   2   7 19.1668 0.91895   1
   7   2   8 6.58893 0.54201   1
   7   2   9 4.38074 0.57645   1
   7   2  10 2.08662 0.90654   1
   7   2  11-0.64503 2.64177   1
   7   3 -11  0.3069 0.92354   1
   7   3 -10 4.02597 1.01593   1
   7   3  -9 10.1728 0.82494   1
   7   3  -8 2.10808 0.47388   1
   7   3  -7 25.3982 1.18159   1
   7   3  -6 5.68059 0.41731   1
   7   3  -5 3.27757  0.3233   1
   7   3  -4 52.6445 1.60196   1
   7   3  -3 2.25086 0.28181   1
   7   3  -2 4.44528 0.29903   1
   7   3  -1 10.1287 0.41335   1
   7   3   0 71.3671 1.93775   1
   7   3   1 8.84295 0.41805   1
   7   3   2  71.416 1.97542   1
   7   3   3 17.2063 0.65298   1
   7   3   4 8.72053 0.41178   1
   7   3   5 32.4673 1.17642   1
   7   3   6  49.707 1.44627   1
   7   3   7 5.89426 0.55287   1
   7   3   8  2.2295 0.48904   1
   7   3   9 0.61598 0.50621   1
   7   3  10 1.56766 0.83998   1
   7   3  11 1.75446 0.87747   1
   7   4 -11 2.08902 0.97959   1
   7   4 -10-1.11668  2.5558   1
   7   4  -9 2.43028 0.72924   1
   7   4  -8 4.51845 0.59473   1
   7   4  -7 0.99084 0.42896   1
   7   4  -6 17.5904 0.75416   1
   7   4  -5 46.9455 1.36596   1
   7   4  -4 63.1511 2.18965   1
   7   4  -3 2.02162  0.2824   1
   7   4  -2 46.2461 1.25282   1
   7   4  -1 108.886 2.89754   1
   7   4   0 37.7704 1.14889   1
   7   4   1 14.2567 0.56349   1
   7   4   2 15.4306 0.59152   1
   7   4   3 41.4217 1.34527   1
   7   4   4 29.0444 0.95676   1
   7   4   5 1.45582 0.35057   1
   7   4   6 7.16358  0.5007   1
   7   4   7  9.6882 0.57469   1
   7   4   8 9.08177 0.65207   1
   7   4   9 0.96799 0.66391   1
   7   4  10 2.55385 1.20546   1
   7   4  11-0.65641 3.25029   1
   7   5 -10 -0.0516 3.10057   1
   7   5  -9 0.34257 0.69876   1
   7   5  -8 0.55234  0.5514   1
   7   5  -7 0.45332  0.5176   1
   7   5  -6 13.3232 0.65377   1
   7   5  -5 8.18299 0.47719   1
   7   5  -4 22.8916 0.78749   1
   7   5  -3 1.67955 0.32217   1
   7   5  -2 85.3892 2.34648   1
   7   5  -1 2.38137 0.26678   1
   7   5   0 9.42135 0.43322   1
   7   5   1 23.0502 0.85594   1
   7   5   2 32.6117 1.09632   1
   7   5   3 40.3032 1.23845   1
   7   5   4 27.1467 1.01202   1
   7   5   5 19.2014 0.74657   1
   7   5   6 34.3734 1.15367   1
   7   5   7 0.40431 0.45191   1
   7   5   8 7.62787 0.71683   1
   7   5   9 0.83659  0.6475   1
   7   5  10 0.35428 1.27261   1
   7   6 -10-0.33643 4.78743   1
   7   6  -9  4.3786 0.92847   1
   7   6  -8 0.29406 0.57471   1
   7   6  -7 1.41682 0.53153   1
   7   6  -6 11.8211 0.65527   1
   7   6  -5 7.49637 0.49856   1
   7   6  -4 30.6804 1.01545   1
   7   6  -3 158.918 4.30183   1
   7   6  -2   32.40  0.9521   1
   7   6  -1 6.59173 0.37639   1
   7   6   0  36.377 1.06544   1
   7   6   1 32.4318 0.98465   1
   7   6   2  16.346 0.79639   1
   7   6   3 54.9359 1.79201   1
   7   6   4 9.26079 0.52525   1
   7   6   5 6.89635 0.48243   1
   7   6   6 1.23868 0.46722   1
   7   6   7 1.00815 0.50857   1
   7   6   8 3.01018 0.66372   1
   7   6   9 4.09157 0.89286   1
   7   6  10 1.07436 0.98355   1
   7   7   0 124.174 4.63675   1
   7   7   1 39.9672 1.33549   1
   7   7   2 5.54984 0.40178   1
   7   7   3 11.5389  0.5644   1
   7   7   4 4.99659 0.48654   1
   7   7   5 11.3554 0.62744   1
   7   7   6 9.30223 0.64999   1
   7   7   7 4.13466 0.68868   1
   7   7   8-0.77494 2.28696   1
   7   7   9 2.45628 1.34381   1
   7   7  10 0.47732 1.09914   1
   8  -4   0 43.1549 1.57283   1
   8  -4   1 461.068 13.4724   1
   8  -4   2 133.859 3.56862   1
   8  -4   3 35.4749 1.29693   1
   8  -4   4 72.3264 1.92766   1
   8  -4   5 31.3984 1.07381   1
   8  -4   6 6.67547 0.33639   1
   8  -4   7 29.6535 1.13884   1
   8  -4   8 15.9413 0.73066   1
   8  -4   9 13.5754 0.73154   1
   8  -4  10 1.70894 0.54615   1
   8  -4  11 3.20543 0.74223   1
   8  -4  12 0.80638 0.90055   1
   8  -3 -12 1.33044 0.96888   1
   8  -3 -11-0.18248 3.61811   1
   8  -3 -10 3.43175  0.6012   1
   8  -3  -9 23.3628 0.99769   1
   8  -3  -8 3.26615 0.44408   1
   8  -3  -7 28.5722 0.91797   1
   8  -3  -6 1.35794 0.25167   1
   8  -3  -5 26.3487 0.85866   1
   8  -3  -4 25.3109 0.78309   1
   8  -3  -3 57.3103 1.51424   1
   8  -3  -2 62.3722 1.90843   1
   8  -3  -1 35.8771 1.23796   1
   8  -3   0 169.482 4.45765   1
   8  -3   1  69.667 1.86795   1
   8  -3   2 127.016 3.41343   1
   8  -3   3  319.10 8.31474   1
   8  -3   4 5.83714 0.35826   1
   8  -3   5 42.9191 1.20095   1
   8  -3   6 29.1845 0.89985   1
   8  -3   7 17.3267 0.70669   1
   8  -3   8 2.82794 0.45594   1
   8  -3   9 10.1078 0.65002   1
   8  -3  10 0.69269 0.59182   1
   8  -3  11 1.55245 0.71989   1
   8  -3  12 0.15043 1.01764   1
   8  -2 -12-0.84236 3.19052   1
   8  -2 -11 8.04146 0.98994   1
   8  -2 -10  2.6899  0.6094   1
   8  -2  -9 2.36071 0.56061   1
   8  -2  -8 13.0638 0.67039   1
   8  -2  -7 30.2272  1.2315   1
   8  -2  -6 1.84426 0.27364   1
   8  -2  -5  10.959 0.45149   1
   8  -2  -4  18.737 0.68823   1
   8  -2  -3 0.60498 0.22009   1
   8  -2  -2 203.251 5.34993   1
   8  -2  -1 12.4709 0.57571   1
   8  -2   0 13.3688 0.53096   1
   8  -2   1 140.367 4.00485   1
   8  -2   2 1.36195 0.25636   1
   8  -2   3 84.9991 2.25757   1
   8  -2   4 3.18759 0.25601   1
   8  -2   5  21.212 0.82787   1
   8  -2   6 12.9242 0.55788   1
   8  -2   7  26.848 1.34662   1
   8  -2   8 12.1678 0.61762   1
   8  -2   9 1.35653 0.63156   1
   8  -2  10 0.82993 0.55729   1
   8  -2  11 0.48611 0.76727   1
   8  -2  12 1.83583 1.81352   1
   8  -1 -12 4.82189  1.2025   1
   8  -1 -11 4.10139 0.91334   1
   8  -1 -10-0.25049 2.30674   1
   8  -1  -9 8.49125 0.64125   1
   8  -1  -8 3.11772 0.47917   1
   8  -1  -7 5.05336 0.40315   1
   8  -1  -6 68.1505 1.84737   1
   8  -1  -5 5.21053 0.31799   1
   8  -1  -4 17.7734 0.64053   1
   8  -1  -3 2.75738 0.25406   1
   8  -1  -2 2.09888 0.25057   1
   8  -1  -1 143.992 3.86516   1
   8  -1   0  25.498 0.82686   1
   8  -1   1 202.783 5.43384   1
   8  -1   2 68.4405  1.9818   1
   8  -1   3 225.843 5.77345   1
   8  -1   4 21.3741 0.83688   1
   8  -1   5 8.96217 0.48214   1
   8  -1   6 5.41396 0.33659   1
   8  -1   7 2.25312 0.37752   1
   8  -1   8 21.0099 0.84871   1
   8  -1   9 7.08406 0.59736   1
   8  -1  10-1.62932  1.9347   1
   8  -1  11 0.08873 0.83025   1
   8  -1  12 0.77186 1.00373   1
   8   0 -11 0.54371 0.93209   1
   8   0 -10  1.1101 0.69405   1
   8   0  -9 13.3916 0.79511   1
   8   0  -8 0.56446 0.44046   1
   8   0  -7 2.87769 0.40346   1
   8   0  -6 19.4532 0.68847   1
   8   0  -5 0.17459 0.28122   1
   8   0  -4 7.59454 0.35737   1
   8   0  -3 19.0251  0.6332   1
   8   0  -2 136.711 3.60071   1
   8   0  -1 4.26162 0.30444   1
   8   0   0 56.1015 1.51156   1
   8   0   1 81.5181 2.17971   1
   8   0   2 2.44999 0.28774   1
   8   0   3 98.2954 2.96922   1
   8   0   4 37.6496 1.05416   1
   8   0   5 10.4262 0.41804   1
   8   0   6 42.1558  1.1747   1
   8   0   7 29.4746 0.96656   1
   8   0   8 1.75181 0.44903   1
   8   0   9 0.20364 0.48009   1
   8   0  10 0.25786 0.67793   1
   8   0  11 2.02823  0.7803   1
   8   1 -11 6.89158 1.09787   1
   8   1 -10 4.72529 0.87823   1
   8   1  -9 -0.2183 1.93655   1
   8   1  -8  11.235 0.65284   1
   8   1  -7 33.2398 1.45433   1
   8   1  -6 20.4888  0.9162   1
   8   1  -5 27.4112 1.04861   1
   8   1  -4 101.675 2.67504   1
   8   1  -3 8.68542 0.45554   1
   8   1  -2 43.5544 1.35897   1
   8   1  -1 1.94521 0.27578   1
   8   1   0  76.141 2.06621   1
   8   1   1 199.786 5.34329   1
   8   1   2 12.2572 0.50574   1
   8   1   3 58.7922 1.63022   1
   8   1   4 15.2039 0.54056   1
   8   1   5 47.7903  1.3688   1
   8   1   6 7.18558 0.43509   1
   8   1   7 2.19308 0.40869   1
   8   1   8-0.15463 1.71833   1
   8   1   9 7.29607 0.65389   1
   8   1  10 1.08268 0.81729   1
   8   1  11 0.20807 0.97885   1
   8   2 -11 0.36428 1.02934   1
   8   2 -10 2.48434 0.86089   1
   8   2  -9 7.22617 0.68431   1
   8   2  -8 6.68945 0.58622   1
   8   2  -7 20.9039 0.93942   1
   8   2  -6 35.9732 1.43147   1
   8   2  -5  0.7032 0.30644   1
   8   2  -4 4.81679 0.42805   1
   8   2  -3 23.0716  0.7328   1
   8   2  -2 6.52088 0.34743   1
   8   2  -1 6.32049 0.34981   1
   8   2   0 84.0063 2.59171   1
   8   2   1 5.50383 0.35425   1
   8   2   2 20.3621  0.6982   1
   8   2   3 225.719 5.97969   1
   8   2   4 37.6378 1.13087   1
   8   2   5 22.0705 1.04644   1
   8   2   6 12.0091 0.57366   1
   8   2   7 28.6863 1.16437   1
   8   2   8 2.54893 0.49551   1
   8   2   9 5.10002  0.6378   1
   8   2  10-0.41486 3.00775   1
   8   2  11 -0.0819 4.90997   1
   8   3 -11 0.39983 1.19939   1
   8   3 -10 5.60753 0.89458   1
   8   3  -9 4.02686 0.73447   1
   8   3  -8 4.93851 0.58721   1
   8   3  -7 1.18458 0.43422   1
   8   3  -6 45.3683 1.42403   1
   8   3  -5  12.311 0.55736   1
   8   3  -4 2.66488 0.29919   1
   8   3  -3 59.1489 1.58714   1
   8   3  -2  22.695 0.95705   1
   8   3  -1 2.05549 0.28182   1
   8   3   0 14.0754 0.54087   1
   8   3   1 61.4113 1.74372   1
   8   3   2 123.098 3.42406   1
   8   3   3 25.0462 0.90434   1
   8   3   4 11.0069 0.48662   1
   8   3   5 13.0259 0.66506   1
   8   3   6 5.84492 0.47496   1
   8   3   7 15.9606 0.75413   1
   8   3   8 11.2059 0.70422   1
   8   3   9 1.71219 0.62947   1
   8   3  10 1.31714 0.84566   1
   8   3  11  2.7526 1.59635   1
   8   4 -10 4.04211 1.25041   1
   8   4  -9 3.61063 0.78063   1
   8   4  -8 1.32627 0.57359   1
   8   4  -7 6.82533 0.61018   1
   8   4  -6  10.989 0.59825   1
   8   4  -5 3.59093 0.39064   1
   8   4  -4 2.53837 0.34918   1
   8   4  -3 76.1832 2.17199   1
   8   4  -2 0.83388 0.25801   1
   8   4  -1 20.0496 0.81598   1
   8   4   0 19.4355  0.6562   1
   8   4   1 9.41281 0.52729   1
   8   4   2 20.3344 0.89197   1
   8   4   3 7.56727 0.44809   1
   8   4   4 20.6913  0.7476   1
   8   4   5 18.8426 0.72665   1
   8   4   6 25.6317  0.9794   1
   8   4   7 19.5048 0.86762   1
   8   4   8 3.20799 0.56637   1
   8   4   9 5.29471 0.83346   1
   8   4  10 1.77667 0.98472   1
   8   5 -10 0.83331 1.35209   1
   8   5  -9 0.36134 0.72056   1
   8   5  -8 2.69282  0.7646   1
   8   5  -7 10.5184 0.72132   1
   8   5  -6 1.08327 0.48074   1
   8   5  -5 74.7399 2.13785   1
   8   5  -4 0.87537 0.39151   1
   8   5  -3 -0.0667 1.51475   1
   8   5  -2 72.2944 2.04038   1
   8   5  -1  2.0717 0.28331   1
   8   5   0 60.6128 1.73732   1
   8   5   1 19.7474 0.71911   1
   8   5   2 6.78888 0.44188   1
   8   5   3 65.2221  1.9337   1
   8   5   4 67.3186 1.93152   1
   8   5   5 16.8349 0.76486   1
   8   5   6 12.7762 0.65838   1
   8   5   7 4.52716 0.57166   1
   8   5   8 1.66716 0.63718   1
   8   5   9 0.21286 0.74236   1
   8   5  10  -0.445 3.58378   1
   8   6 -10-0.96566 3.28054   1
   8   6  -9 1.54443 0.85974   1
   8   6  -8 1.70512 0.75587   1
   8   6  -7  4.6818 0.75366   1
   8   6  -6 3.41118 0.55687   1
   8   6  -5 4.95504  0.4823   1
   8   6  -4 0.06435 0.38815   1
   8   6  -3 13.6905 0.61182   1
   8   6  -2 32.2401 1.16985   1
   8   6  -1 1.43121 0.34898   1
   8   6   0 14.4772 0.59658   1
   8   6   1 72.5314 2.01468   1
   8   6   2 35.6704 1.22607   1
   8   6   3 24.3921 0.93556   1
   8   6   4 3.12593 0.46836   1
   8   6   5 8.75819 0.57537   1
   8   6   6 2.47512 0.51342   1
   8   6   7 4.61667 0.69752   1
   8   6   8   0.957 0.66488   1
   8   6   9  1.7982 0.88786   1
   8   6  10-1.35219 3.62886   1
   8   7  -9 -0.9107 3.09016   1
   8   7  -8 0.85331 0.93609   1
   8   7  -7 1.95883 0.64685   1
   8   7  -6  4.2607 0.61169   1
   8   7  -5 9.09185 0.62044   1
   8   7  -4 16.7593 0.78834   1
   8   7  -3-0.50813  1.9223   1
   8   7  -2 11.6128 0.55542   1
   8   7  -1 2.12026 0.36622   1
   8   7   0 5.03494  0.4092   1
   8   7   1 19.6321 0.72146   1
   8   7   2 46.6266 1.53882   1
   8   7   3 8.32373 0.54377   1
   8   7   4 1.29767 0.45965   1
   8   7   5 21.8828 0.96725   1
   8   7   6 3.02584 0.58901   1
   8   7   7 1.57188 0.76407   1
   8   7   8 1.75821  0.9409   1
   8   7   9-0.23505 3.02233   1
   8   8   0 19.1978 0.95318   1
   8   8   1 5.45999  0.4552   1
   8   8   2 40.1521 1.29386   1
   8   8   3 1.25216  0.4884   1
   8   8   4  14.543 0.78655   1
   8   8   5 3.08002 0.56157   1
   8   8   6 4.55467    0.72   1
   8   8   7 1.15519 0.70616   1
   8   8   8 0.48273 0.84921   1
   9  -4 -12-0.03449 3.20911   1
   9  -4 -11 1.35247 0.75776   1
   9  -4 -10 3.64851 0.67388   1
   9  -4  -9 12.2229 0.73749   1
   9  -4  -8 1.32245 0.43143   1
   9  -4  -7 77.0099 2.14776   1
   9  -4  -6 10.7923 0.45831   1
   9  -4  -5 1.14729 0.28862   1
   9  -4  -4  14.028 0.52459   1
   9  -4  -3 30.5714 1.03807   1
   9  -4  -2 255.337 7.81475   1
   9  -4  -1 17.2439 0.71774   1
   9  -4   0 53.0755 1.49534   1
   9  -4   1  96.742 3.03927   1
   9  -4   2 57.6505 1.59345   1
   9  -4   3  75.248 2.22594   1
   9  -4   4 2.33411 0.30324   1
   9  -4   5 47.5355  1.3093   1
   9  -4   6 9.90133 0.45171   1
   9  -4   7 19.6937 0.79564   1
   9  -4   8 3.48047 0.49346   1
   9  -4   9 2.75801 0.50439   1
   9  -4  10 -0.2326 2.52855   1
   9  -4  11 1.86555 0.85016   1
   9  -4  12 1.46894  1.2845   1
   9  -3 -11 4.19368 1.07031   1
   9  -3 -10 0.03473 0.65159   1
   9  -3  -9 13.9416 0.80795   1
   9  -3  -8 10.5414 0.62425   1
   9  -3  -7 33.7192 1.23135   1
   9  -3  -6 49.7566 1.73988   1
   9  -3  -5 0.41858 0.26086   1
   9  -3  -4 9.03397 0.38372   1
   9  -3  -3 16.3973 0.55604   1
   9  -3  -2 74.5397 2.17552   1
   9  -3  -1 85.2645 2.56021   1
   9  -3   0 122.861 3.30656   1
   9  -3   1 170.998 4.69102   1
   9  -3   2 148.501 4.16492   1
   9  -3   3 66.4756 1.77481   1
   9  -3   4 90.6059 2.42263   1
   9  -3   5  17.588 0.70893   1
   9  -3   6 3.88293 0.36099   1
   9  -3   7 2.82236 0.38622   1
   9  -3   8 32.4255 1.54857   1
   9  -3   9 0.64714  0.5879   1
   9  -3  10  1.4752 0.61352   1
   9  -3  11 3.29346 0.90145   1
   9  -2 -11  0.4394 0.76758   1
   9  -2 -10 2.48263  0.7284   1
   9  -2  -9 22.5374 1.05654   1
   9  -2  -8 7.62506 0.58433   1
   9  -2  -7 1.29208 0.37409   1
   9  -2  -6 19.6067 0.69849   1
   9  -2  -5 25.6882  0.8203   1
   9  -2  -4  21.345 0.77676   1
   9  -2  -3 8.42241  0.4263   1
   9  -2  -2 85.9569 2.29636   1
   9  -2  -1 8.08289 0.37644   1
   9  -2   0 45.8484 1.37539   1
   9  -2   1 279.628 7.66871   1
   9  -2   2 104.448 3.12819   1
   9  -2   3 108.483 2.81472   1
   9  -2   4 41.8842 1.12975   1
   9  -2   5  21.232 0.65594   1
   9  -2   6 42.1862 1.22025   1
   9  -2   7 19.3994 0.84191   1
   9  -2   8 6.57422 0.52028   1
   9  -2   9 4.24035 0.61433   1
   9  -2  10 2.15277 0.67005   1
   9  -2  11-1.28104 2.81742   1
   9  -1 -11 6.66747 0.94113   1
   9  -1 -10 6.04652 0.76912   1
   9  -1  -9 0.33282 0.68642   1
   9  -1  -8  11.804 0.66282   1
   9  -1  -7 33.6501 1.23641   1
   9  -1  -6 22.7835  0.7839   1
   9  -1  -5 27.9356 0.84295   1
   9  -1  -4 100.733 2.55613   1
   9  -1  -3 8.77181 0.38954   1
   9  -1  -2 42.3386 1.29566   1
   9  -1  -1 1.50348 0.26606   1
   9  -1   0 77.6162 2.19436   1
   9  -1   1 199.961 5.54005   1
   9  -1   2 12.5661 0.50699   1
   9  -1   3 59.1981  1.7218   1
   9  -1   4 14.3948 0.48627   1
   9  -1   5 46.8809 1.45887   1
   9  -1   6 7.36379 0.44505   1
   9  -1   7 2.68754 0.38656   1
   9  -1   8 0.68774 0.47486   1
   9  -1   9 8.10702 0.67173   1
   9  -1  10 0.64509 0.76391   1
   9  -1  11 1.17164 0.78369   1
   9   0 -11-0.42417 3.01761   1
   9   0 -10-1.09304 2.90315   1
   9   0  -9 0.49163 0.54479   1
   9   0  -8 3.95454 0.52237   1
   9   0  -7 3.73125 0.44979   1
   9   0  -6 17.0348  0.8122   1
   9   0  -5  4.3658 0.36102   1
   9   0  -4 1.68523 0.27455   1
   9   0  -3 5.20718 0.32172   1
   9   0  -2 12.2778 0.47729   1
   9   0  -1 9.00678 0.43956   1
   9   0   0 0.20843 0.25031   1
   9   0   1 0.10382 0.24218   1
   9   0   2 3.20279 0.31509   1
   9   0   3 127.017 3.99347   1
   9   0   4 11.4811 0.50898   1
   9   0   5 6.74363 0.39186   1
   9   0   6 129.464 3.45454   1
   9   0   7 8.84303 0.52114   1
   9   0   8-0.56595 1.83053   1
   9   0   9   2.191 0.57505   1
   9   0  10 1.11863 0.67583   1
   9   0  11-0.21456 4.37731   1
   9   1 -11 5.02631 1.18221   1
   9   1 -10 0.82816 0.95955   1
   9   1  -9 4.36986 0.67398   1
   9   1  -8 0.93444 0.50585   1
   9   1  -7 0.36819 0.45182   1
   9   1  -6 23.9716 0.85538   1
   9   1  -5 13.8174 0.59303   1
   9   1  -4 74.2675 1.94721   1
   9   1  -3  1.3315 0.26287   1
   9   1  -2 23.7517 0.92607   1
   9   1  -1 11.7685 0.53777   1
   9   1   0 8.64041 0.42058   1
   9   1   1 17.8023 0.71846   1
   9   1   2 17.4804  0.6345   1
   9   1   3 59.3491 1.65376   1
   9   1   4 54.7005 1.48779   1
   9   1   5 4.71249 0.49439   1
   9   1   6  12.047 0.60689   1
   9   1   7 51.0213 1.58981   1
   9   1   8 4.23242 0.57138   1
   9   1   9 2.70116 0.60442   1
   9   1  10 0.13928 0.76087   1
   9   1  11-0.49536 2.97846   1
   9   2 -11-0.48714 3.62984   1
   9   2 -10 5.18216 0.97443   1
   9   2  -9 1.22199 0.63406   1
   9   2  -8 16.0747 0.90178   1
   9   2  -7 47.6695  1.5989   1
   9   2  -6 19.1956 0.87321   1
   9   2  -5 44.2639 1.44188   1
   9   2  -4 6.90836 0.42186   1
   9   2  -3 12.3955 0.51013   1
   9   2  -2 19.2227 0.76403   1
   9   2  -1 50.2407 1.39139   1
   9   2   0 78.8743 2.13731   1
   9   2   1 25.8449  0.8231   1
   9   2   2 24.8591 0.85089   1
   9   2   3  21.065 0.82598   1
   9   2   4 25.5651 0.81355   1
   9   2   5 10.6469  0.5978   1
   9   2   6  18.038 0.76913   1
   9   2   7 0.45007 0.43398   1
   9   2   8 2.95153 0.53678   1
   9   2   9 5.36845 0.70234   1
   9   2  10 1.16431 0.93839   1
   9   2  11 0.99982 1.07678   1
   9   3 -10 0.28135 0.85419   1
   9   3  -9 4.11095  0.8329   1
   9   3  -8 13.0524 0.89533   1
   9   3  -7 8.20341 0.63605   1
   9   3  -6 7.58954 0.54075   1
   9   3  -5 51.7131 1.76714   1
   9   3  -4  28.559 1.12817   1
   9   3  -3 8.59708 0.45349   1
   9   3  -2 2.71607  0.3292   1
   9   3  -1  30.131 0.96828   1
   9   3   0 70.2319  2.0471   1
   9   3   1 30.3064 1.25998   1
   9   3   2 24.9075 0.96522   1
   9   3   3 52.0416 1.51604   1
   9   3   4 67.3452 1.99717   1
   9   3   5 36.2122 1.20727   1
   9   3   6 25.0269 0.94539   1
   9   3   7  12.853  0.7308   1
   9   3   8-0.40006 2.21957   1
   9   3   9 0.16602 0.67833   1
   9   3  10 1.93355 1.18148   1
   9   4 -10 2.72002 1.39931   1
   9   4  -9 1.10247 0.81043   1
   9   4  -8 0.38856 0.77734   1
   9   4  -7 3.32226 0.55059   1
   9   4  -6 1.59142 0.47691   1
   9   4  -5 2.48254 0.46832   1
   9   4  -4 24.3704 0.85272   1
   9   4  -3 8.57359 0.45575   1
   9   4  -2  8.2766 0.43236   1
   9   4  -1  2.9545 0.32811   1
   9   4   0 44.7291 1.29491   1
   9   4   1 97.9308 2.66792   1
   9   4   2 62.1243 1.87606   1
   9   4   3 34.3421 1.27913   1
   9   4   4 23.1644 0.82785   1
   9   4   5 -0.2065 1.62968   1
   9   4   6 4.21619 0.47743   1
   9   4   7 2.91961 0.58142   1
   9   4   8 7.76413 0.76395   1
   9   4   9 0.06375 0.72732   1
   9   4  10 1.02384  1.2316   1
   9   5  -9 1.81333 0.96952   1
   9   5  -8 0.67583  0.6691   1
   9   5  -7 0.58198 0.63239   1
   9   5  -6 4.46546 0.58215   1
   9   5  -5 20.2065 0.88536   1
   9   5  -4 17.2009 0.73125   1
   9   5  -3 15.4926 0.65778   1
   9   5  -2 40.9987 1.28763   1
   9   5  -1 9.92967 0.55566   1
   9   5   0 25.3771 0.92841   1
   9   5   1 6.91308 0.46738   1
   9   5   2 51.9143 1.57251   1
   9   5   3 2.76916 0.43058   1
   9   5   4 30.3361 1.09719   1
   9   5   5 4.40233 0.47808   1
   9   5   6-0.04312 1.91722   1
   9   5   7 2.03533 0.56296   1
   9   5   8 1.45746  0.7739   1
   9   5   9 0.17182 0.90839   1
   9   6  -9-1.88471 3.12481   1
   9   6  -8-0.09787 2.62914   1
   9   6  -7 2.45754 0.73106   1
   9   6  -6 6.03517 0.64399   1
   9   6  -5 0.32701 0.47226   1
   9   6  -4 6.70298 0.54675   1
   9   6  -3  1.5523 0.40377   1
   9   6  -2 10.7001 0.54722   1
   9   6  -1 13.0238 0.56842   1
   9   6   0 37.5818 1.16601   1
   9   6   1 30.4142 1.01749   1
   9   6   2 17.7988 0.76064   1
   9   6   3 44.7826 1.47426   1
   9   6   4 11.3164 0.70975   1
   9   6   5 5.62858 0.56202   1
   9   6   6 0.43617 0.62262   1
   9   6   7 1.64719 0.92236   1
   9   6   8-0.31822 3.22799   1
   9   6   9 0.48544 1.05418   1
   9   7  -8 0.21903 0.87412   1
   9   7  -7  1.7505 0.76419   1
   9   7  -6 5.36326 0.74733   1
   9   7  -5 6.72524 0.63309   1
   9   7  -4 22.1536 0.98411   1
   9   7  -3 7.03692 0.55364   1
   9   7  -2 6.96953 0.52177   1
   9   7  -1 5.09746  0.4443   1
   9   7   0 9.54816 0.52786   1
   9   7   1 5.16219 0.46342   1
   9   7   2 39.3928 1.29141   1
   9   7   3 0.28759 0.46265   1
   9   7   4 2.02056 0.53033   1
   9   7   5 3.72365 0.65091   1
   9   7   6-0.70739 2.95715   1
   9   7   7 4.02709 0.78663   1
   9   7   8 1.49779 0.83079   1
   9   8  -8-1.50107 3.52344   1
   9   8  -7 3.07665 0.89149   1
   9   8  -6 1.37493 0.71378   1
   9   8  -5  10.108 0.82117   1
   9   8  -4 5.12936 0.61852   1
   9   8  -3 17.0853 0.83879   1
   9   8  -2 9.26686 0.62101   1
   9   8  -1 4.53411 0.51736   1
   9   8   0 1.20689 0.46186   1
   9   8   1 0.60236  0.4428   1
   9   8   2 10.0871 0.64597   1
   9   8   3 11.8468 0.80722   1
   9   8   4 0.09418 0.63785   1
   9   8   5 6.39669 0.69934   1
   9   8   6-0.17737  2.5612   1
   9   8   7 3.30908 0.82873   1
   9   8   8 1.38229 0.94891   1
   9   9   0 15.4882 1.21233   1
   9   9   1 9.42154 0.69493   1
   9   9   2 0.31196 0.50194   1
   9   9   3 6.20845 0.67854   1
   9   9   4 0.30924 0.73719   1
   9   9   5 3.03876 0.73771   1
   9   9   6-1.07684 3.24903   1
   9   9   7-0.60034 3.66758   1
  10  -5   0 27.4517 1.19668   1
  10  -5   1 16.1611 0.67295   1
  10  -5   2 26.7391 0.89148   1
  10  -5   3 16.3134 0.58923   1
  10  -5   4 11.9016 0.46802   1
  10  -5   5 32.7998  1.2738   1
  10  -5   6 11.7072  0.5342   1
  10  -5   7 12.8556 0.61479   1
  10  -5   8  5.6435 0.53976   1
  10  -5   9  3.8455 0.69965   1
  10  -5  10  1.3303 0.69721   1
  10  -5  11 0.64519 0.91131   1
  10  -4 -11-0.51706  2.9395   1
  10  -4 -10-0.62132 2.31269   1
  10  -4  -9 2.61472 0.55166   1
  10  -4  -8 4.00586 0.53082   1
  10  -4  -7-0.70672 1.64753   1
  10  -4  -6 2.64497 0.36968   1
  10  -4  -5 49.8514 1.45442   1
  10  -4  -4 6.48604 0.42585   1
  10  -4  -3 2.15511  0.2781   1
  10  -4  -2 30.8521 0.97114   1
  10  -4  -1 3.88476 0.35793   1
  10  -4   0 28.4688 0.88453   1
  10  -4   1 63.7802 2.03228   1
  10  -4   2 48.0087 1.59193   1
  10  -4   3 2.14905 0.29602   1
  10  -4   4 108.358   2.842   1
  10  -4   5 18.0333 0.67385   1
  10  -4   6 19.3879   0.732   1
  10  -4   7 1.84623 0.41797   1
  10  -4   8 16.3817 0.82996   1
  10  -4   9 4.66178  0.6617   1
  10  -4  10 0.67325 0.79929   1
  10  -4  11 2.25668 0.98319   1
  10  -3 -11 1.64228 1.15782   1
  10  -3 -10 3.57242 0.71371   1
  10  -3  -9 9.78583 0.76882   1
  10  -3  -8 1.97652 0.49116   1
  10  -3  -7 25.5118 1.06268   1
  10  -3  -6 5.41975 0.41173   1
  10  -3  -5 3.07629 0.32245   1
  10  -3  -4 51.6779 1.50925   1
  10  -3  -3  1.8029 0.29163   1
  10  -3  -2 4.07968  0.3319   1
  10  -3  -1  10.148 0.43024   1
  10  -3   0 73.1648 1.96018   1
  10  -3   1 9.26015 0.46764   1
  10  -3   2 69.0529 1.90203   1
  10  -3   3 17.5679 0.59606   1
  10  -3   4 8.41947 0.42863   1
  10  -3   5 31.3029 1.07395   1
  10  -3   6 48.4442 1.48006   1
  10  -3   7 6.44779 0.48539   1
  10  -3   8 2.87358 0.48422   1
  10  -3   9 0.58027  0.6821   1
  10  -3  10 0.94882 0.63947   1
  10  -3  11 0.66694 0.91847   1
  10  -2 -11 0.46362 1.03555   1
  10  -2 -10 0.95245 0.72168   1
  10  -2  -9 5.46477 0.64357   1
  10  -2  -8 6.91521 0.56774   1
  10  -2  -7 21.3889  0.8201   1
  10  -2  -6 35.7241 1.10903   1
  10  -2  -5 0.70235 0.30716   1
  10  -2  -4 4.51394 0.32275   1
  10  -2  -3 21.8791 0.83014   1
  10  -2  -2 6.34502 0.38886   1
  10  -2  -1 6.80141 0.36401   1
  10  -2   0 81.7456 2.31339   1
  10  -2   1 5.96473 0.35258   1
  10  -2   2 19.7297 0.81719   1
  10  -2   3 225.908 6.08688   1
  10  -2   4  36.145 1.07341   1
  10  -2   5 21.7235 0.68619   1
  10  -2   6 11.1956 0.54694   1
  10  -2   7 30.4613 1.05903   1
  10  -2   8 2.57099 0.53255   1
  10  -2   9 5.16037 0.63018   1
  10  -2  10   1.022 0.68885   1
  10  -2  11-1.19193 2.61086   1
  10  -1 -11  5.0712 0.98505   1
  10  -1 -10  0.9841 0.79308   1
  10  -1  -9 5.20391 0.75473   1
  10  -1  -8 1.39221 0.49363   1
  10  -1  -7-0.05211 1.66049   1
  10  -1  -6 25.5063 0.88826   1
  10  -1  -5 13.1169 0.53788   1
  10  -1  -4 70.7484 1.95202   1
  10  -1  -3 1.25312 0.28151   1
  10  -1  -2 23.1169 0.77809   1
  10  -1  -1 12.0437 0.59788   1
  10  -1   0 7.71135 0.40785   1
  10  -1   1 17.8816 0.59628   1
  10  -1   2 17.5973 0.75556   1
  10  -1   3 59.4218 1.62087   1
  10  -1   4  52.761  1.5104   1
  10  -1   5 5.36354  0.3866   1
  10  -1   6 12.7291 0.63528   1
  10  -1   7 49.0657  1.5959   1
  10  -1   8 4.02775  0.6046   1
  10  -1   9  3.2771 0.61039   1
  10  -1  10 2.35992  0.8205   1
  10  -1  11-0.14116 2.92101   1
  10   0 -11 2.84801 1.26614   1
  10   0 -10 3.15976   1.064   1
  10   0  -9 0.72648 0.59296   1
  10   0  -8-0.01847 2.54696   1
  10   0  -7 10.8822 0.62366   1
  10   0  -6 21.0336 0.79094   1
  10   0  -5 12.6046 0.54913   1
  10   0  -4 23.4227 0.78236   1
  10   0  -3 1.73391 0.28949   1
  10   0  -2 35.9303 1.05973   1
  10   0  -1 2.01394 0.31112   1
  10   0   0 7.07078 0.44333   1
  10   0   1 8.22066 0.40831   1
  10   0   2 7.68512 0.45918   1
  10   0   3 10.0065 0.51063   1
  10   0   4 33.9506 1.09883   1
  10   0   5 19.8128 0.71091   1
  10   0   6  75.914  2.1555   1
  10   0   7 2.47222  0.4529   1
  10   0   8 3.80915 0.58835   1
  10   0   9 2.55855 0.65722   1
  10   0  10 1.76301 0.89151   1
  10   0  11 2.37531 1.01431   1
  10   1 -10 2.21728 0.89602   1
  10   1  -9  4.5134 0.72968   1
  10   1  -8 2.00476 0.57227   1
  10   1  -7 1.50185 0.45094   1
  10   1  -6 10.4104 0.59191   1
  10   1  -5 0.90589 0.35333   1
  10   1  -4 14.2202 0.55022   1
  10   1  -3 0.00033 0.26972   1
  10   1  -2 39.5236 1.20311   1
  10   1  -1 10.6166 0.55273   1
  10   1   0 54.8879 1.58615   1
  10   1   1 5.75694 0.38896   1
  10   1   2 87.1257 2.42623   1
  10   1   3 39.1768 1.18382   1
  10   1   4 79.6951 2.49269   1
  10   1   5 11.8369 0.60111   1
  10   1   6 51.8455 1.59929   1
  10   1   7 2.39323 0.47424   1
  10   1   8 1.84888  0.5356   1
  10   1   9 0.41942 0.58079   1
  10   1  10 1.89466 0.79421   1
  10   2 -10 2.06347 0.97697   1
  10   2  -9  0.7017 0.84851   1
  10   2  -8 0.33054 0.58069   1
  10   2  -7 6.95345 0.60676   1
  10   2  -6 6.03847 0.56608   1
  10   2  -5 32.3639 1.13231   1
  10   2  -4  5.0147 0.43957   1
  10   2  -3 47.6197 1.36781   1
  10   2  -2 0.37157 0.30929   1
  10   2  -1 9.14776 0.49454   1
  10   2   0 4.43394 0.40666   1
  10   2   1 8.67234 0.47572   1
  10   2   2 36.1313 1.10514   1
  10   2   3 71.7626 2.01727   1
  10   2   4 40.2743 1.20646   1
  10   2   5 2.43856 0.40939   1
  10   2   6 8.56783 0.64133   1
  10   2   7 4.55113 0.53804   1
  10   2   8 5.37108 0.62266   1
  10   2   9 1.47315 0.64175   1
  10   2  10 2.68143 1.04029   1
  10   3 -10-0.14563 5.09547   1
  10   3  -9 3.31127  0.7937   1
  10   3  -8 0.35242 0.66396   1
  10   3  -7 8.45845 0.73069   1
  10   3  -6-0.16624  1.8885   1
  10   3  -5 10.3436 0.56966   1
  10   3  -4 27.0472 1.02146   1
  10   3  -3  16.599 0.64326   1
  10   3  -2 6.32842 0.42876   1
  10   3  -1 52.3933 1.48655   1
  10   3   0 9.63521 0.49044   1
  10   3   1 30.1488 1.00663   1
  10   3   2 44.3991 1.41659   1
  10   3   3 33.9358 1.21313   1
  10   3   4 14.3475 0.63731   1
  10   3   5 1.58011 0.39966   1
  10   3   6-0.26747 1.89835   1
  10   3   7  5.5976 0.63271   1
  10   3   8 1.54022 0.60349   1
  10   3   9 1.13108  0.7795   1
  10   3  10 1.21401 1.50297   1
  10   4  -9 0.92945 0.88997   1
  10   4  -8 1.85841 0.74716   1
  10   4  -7 2.03312 0.65347   1
  10   4  -6  6.4631 0.65848   1
  10   4  -5 3.24518 0.45875   1
  10   4  -4 1.58789 0.40478   1
  10   4  -3 2.71679 0.39477   1
  10   4  -2 45.7329 1.37351   1
  10   4  -1-0.21193 1.56153   1
  10   4   0 21.2332 0.74531   1
  10   4   1 96.0379 2.68267   1
  10   4   2  30.507 1.03564   1
  10   4   3 10.9024 0.62921   1
  10   4   4 25.2341 0.93625   1
  10   4   5 12.6902 0.69207   1
  10   4   6 2.96921 0.49991   1
  10   4   7-0.10899 3.00673   1
  10   4   8 2.80418  0.7667   1
  10   4   9-0.92855 2.97249   1
  10   5  -9 0.52551 0.92775   1
  10   5  -8 1.64876 0.94796   1
  10   5  -7 4.70377  0.7218   1
  10   5  -6  2.5384 0.60804   1
  10   5  -5 10.1539 0.70522   1
  10   5  -4 1.99671 0.45095   1
  10   5  -3 4.57097 0.46739   1
  10   5  -2 15.5232 0.68687   1
  10   5  -1 27.6198 0.99312   1
  10   5   0 7.89653 0.48194   1
  10   5   1 17.8892 0.72335   1
  10   5   2 38.2187 1.30702   1
  10   5   3 29.9392 1.10234   1
  10   5   4 16.0807 0.79169   1
  10   5   5   13.30 0.83623   1
  10   5   6 0.43878 0.53602   1
  10   5   7 4.41782 0.71146   1
  10   5   8 1.38742 0.78599   1
  10   5   9 0.53778 1.23447   1
  10   6  -8  3.9873 0.93644   1
  10   6  -7 1.36674 0.70437   1
  10   6  -6 3.95574 0.70273   1
  10   6  -5 7.59867 0.67935   1
  10   6  -4 2.04426 0.52053   1
  10   6  -3 12.4211 0.73115   1
  10   6  -2 2.55421 0.44783   1
  10   6  -1 6.18774 0.51254   1
  10   6   0 6.06942 0.47048   1
  10   6   1 16.2838 0.72861   1
  10   6   2  21.649 0.99635   1
  10   6   3 2.00232 0.50937   1
  10   6   4  3.1476 0.55583   1
  10   6   5 15.7856 0.90094   1
  10   6   6 0.17886 0.64503   1
  10   6   7 1.10441 0.75638   1
  10   6   8 2.24464 1.02095   1
  10   7  -8 0.71689  0.9758   1
  10   7  -7 1.63927 0.84628   1
  10   7  -6 4.61544 0.81002   1
  10   7  -5 12.1711 0.90474   1
  10   7  -4 12.7879 0.78995   1
  10   7  -3 11.2112 0.70795   1
  10   7  -2 22.0399 0.94807   1
  10   7  -1 10.2787 0.62467   1
  10   7   0 19.6141 0.85797   1
  10   7   1 33.4079 1.17217   1
  10   7   2 2.08788 0.57179   1
  10   7   3  7.0531 0.65604   1
  10   7   4 5.05177 0.93119   1
  10   7   5 1.21017 0.61587   1
  10   7   6 0.82071 0.71187   1
  10   7   7 1.88537 0.86529   1
  10   7   8 1.55234 1.36258   1
  10   8  -7 0.14797 1.11135   1
  10   8  -6 7.00014 1.02989   1
  10   8  -5 0.79274 0.71614   1
  10   8  -4 6.50053  0.7395   1
  10   8  -3 9.04225 0.70543   1
  10   8  -2 2.27002 0.54431   1
  10   8  -1 6.05439 0.64646   1
  10   8   0 3.76818 0.61116   1
  10   8   1 8.75857 0.82379   1
  10   8   2  1.8785 0.55545   1
  10   8   3  1.8588 0.80288   1
  10   8   4 4.45402 0.74716   1
  10   8   5 4.13865 0.71222   1
  10   8   6 2.69075 1.08413   1
  10   8   7 4.56775 1.01857   1
  10   9  -6 0.18867 0.96798   1
  10   9  -5 1.02379 0.81492   1
  10   9  -4 0.37341 0.70661   1
  10   9  -3 5.96305 0.71036   1
  10   9  -2 0.33745 0.56956   1
  10   9  -1-0.24703 2.40124   1
  10   9   0 4.14466   0.705   1
  10   9   1 5.45283 0.75159   1
  10   9   2 0.65721 0.59943   1
  10   9   3 8.46055 0.83939   1
  10   9   4 0.95841 0.69317   1
  10   9   5 3.25995 0.81325   1
  10   9   6-0.51594 3.14596   1
  10  10   0 2.11248 1.29694   1
  10  10   1 7.84028 0.89789   1
  10  10   2 3.24994  0.7949   1
  10  10   3 2.42681 1.24385   1
  10  10   4 1.03876 0.87246   1
  11  -5 -11-0.37851 3.02954   1
  11  -5 -10-0.21306  2.5477   1
  11  -5  -9 4.79919 0.68616   1
  11  -5  -8-0.76177 1.87077   1
  11  -5  -7 12.4532 0.63368   1
  11  -5  -6 6.81655 0.46129   1
  11  -5  -5 44.5154 1.66293   1
  11  -5  -4 16.7711 0.60106   1
  11  -5  -3 15.7991 0.63921   1
  11  -5  -2 3.69674 0.36015   1
  11  -5  -1  19.383 0.76126   1
  11  -5   0 3.62965 0.34958   1
  11  -5   1 24.7428 1.12719   1
  11  -5   2 78.1794 2.47406   1
  11  -5   3 16.0845 0.60703   1
  11  -5   4 0.70831 0.30189   1
  11  -5   5 2.03677 0.40437   1
  11  -5   6 4.09699 0.40351   1
  11  -5   7 4.29193  0.4631   1
  11  -5   8 0.87297 0.53568   1
  11  -5   9-0.49802 2.94886   1
  11  -5  10-0.56735 2.74936   1
  11  -5  11  1.7372 1.05452   1
  11  -4 -11 1.09472 1.14765   1
  11  -4 -10-1.17656 2.33113   1
  11  -4  -9  4.8595 0.68514   1
  11  -4  -8  4.1479 0.61908   1
  11  -4  -7 0.29558 0.41128   1
  11  -4  -6 17.6377 0.82048   1
  11  -4  -5 46.3681 1.56774   1
  11  -4  -4 65.2661 1.96317   1
  11  -4  -3 1.65723 0.30754   1
  11  -4  -2 47.8707 1.35838   1
  11  -4  -1 108.248 2.91297   1
  11  -4   0 36.7072 1.08965   1
  11  -4   1 13.6739 0.57784   1
  11  -4   2 15.9949 0.63096   1
  11  -4   3 43.7231 1.26177   1
  11  -4   4 28.8284 1.04376   1
  11  -4   5  0.5649 0.33533   1
  11  -4   6 7.50982 0.49468   1
  11  -4   7 9.27808 0.56946   1
  11  -4   8 9.70257  0.6897   1
  11  -4   9 1.16112 0.80531   1
  11  -4  10 1.85892 0.88224   1
  11  -4  11-0.44686 2.96081   1
  11  -3 -11 2.46179 1.08016   1
  11  -3 -10 4.31943 0.85355   1
  11  -3  -9 2.92817 0.66386   1
  11  -3  -8 3.64289 0.58982   1
  11  -3  -7 1.96052 0.43437   1
  11  -3  -6 45.9081 1.58927   1
  11  -3  -5 11.5103 0.51637   1
  11  -3  -4  2.9821 0.32102   1
  11  -3  -3 59.7946 1.82269   1
  11  -3  -2 22.9174 0.86145   1
  11  -3  -1  2.3225 0.30764   1
  11  -3   0 13.6617 0.57519   1
  11  -3   1 60.7415 1.82424   1
  11  -3   2 124.967 3.51326   1
  11  -3   3 24.2882  0.7807   1
  11  -3   4 10.9415 0.46785   1
  11  -3   5 14.3383 0.64607   1
  11  -3   6 6.22441  0.4557   1
  11  -3   7 16.0026 0.76413   1
  11  -3   8 13.1118 0.94572   1
  11  -3   9 4.09522 0.64787   1
  11  -3  10  0.9625 0.70235   1
  11  -3  11-1.25548  3.1148   1
  11  -2 -11 0.99768 1.01235   1
  11  -2 -10 5.16887 1.08517   1
  11  -2  -9 2.14288 0.63877   1
  11  -2  -8 17.1628 0.85995   1
  11  -2  -7 48.2558 1.71146   1
  11  -2  -6 18.9268 0.73495   1
  11  -2  -5  44.867 1.44758   1
  11  -2  -4 5.78548  0.3744   1
  11  -2  -3 11.4875 0.50194   1
  11  -2  -2 19.2802 0.85059   1
  11  -2  -1 48.6902 1.35123   1
  11  -2   0 77.5781 2.28503   1
  11  -2   1  26.616 0.82824   1
  11  -2   2 24.9053 0.83375   1
  11  -2   3 20.9587 0.81888   1
  11  -2   4 24.5905 0.79548   1
  11  -2   5 11.2526 0.55962   1
  11  -2   6 18.0755 0.77094   1
  11  -2   7 0.85564 0.44638   1
  11  -2   8 1.86198 0.58098   1
  11  -2   9 7.52241 0.72724   1
  11  -2  10 0.72041 0.73947   1
  11  -2  11 0.58424  1.2143   1
  11  -1 -10 0.18404 0.82461   1
  11  -1  -9 3.86829 0.68483   1
  11  -1  -8  2.1477 0.52399   1
  11  -1  -7 2.76299 0.46005   1
  11  -1  -6 10.1655 0.59036   1
  11  -1  -5 0.23987  0.3501   1
  11  -1  -4 14.5574 0.63499   1
  11  -1  -3-0.40642 1.43672   1
  11  -1  -2 39.0757 1.17894   1
  11  -1  -1 11.0684 0.59996   1
  11  -1   0 53.9187 1.60562   1
  11  -1   1 5.93835 0.35721   1
  11  -1   2 86.1179 2.35637   1
  11  -1   3 37.2618 1.19224   1
  11  -1   4 79.7421 2.17829   1
  11  -1   5  12.501 0.61273   1
  11  -1   6 52.8586 1.62479   1
  11  -1   7 3.01984 0.51485   1
  11  -1   8 1.04937  0.5514   1
  11  -1   9 0.47141 0.76836   1
  11  -1  10 0.71186 0.77735   1
  11   0 -10 -0.4477  2.8208   1
  11   0  -9 1.22993 0.69986   1
  11   0  -8-0.00553 2.65451   1
  11   0  -7 0.76418 0.45338   1
  11   0  -6 16.9595 0.73131   1
  11   0  -5 15.0663 0.65153   1
  11   0  -4 -0.1704 1.41121   1
  11   0  -3  20.693 0.71095   1
  11   0  -2 11.5968 0.50872   1
  11   0  -1 4.53096 0.38527   1
  11   0   0 15.8577 0.60789   1
  11   0   1-0.09496 1.39592   1
  11   0   2 92.4198 2.55882   1
  11   0   3 37.1319 1.39367   1
  11   0   4 91.2508 2.88161   1
  11   0   5 1.46165 0.37003   1
  11   0   6 1.23517 0.41427   1
  11   0   7 0.20993 0.46212   1
  11   0   8 0.63596 0.59319   1
  11   0   9-0.67894 2.38389   1
  11   0  10 0.02283 1.04815   1
  11   1 -10 2.40569 0.97389   1
  11   1  -9 0.29698 0.76405   1
  11   1  -8 3.09163 0.74421   1
  11   1  -7 10.5024 0.69305   1
  11   1  -6  2.8607 0.50943   1
  11   1  -5 1.26459 0.40011   1
  11   1  -4-0.06408 1.52105   1
  11   1  -3 4.79374 0.39511   1
  11   1  -2 7.12401 0.43265   1
  11   1  -1 31.7813 1.27783   1
  11   1   0 13.1407 0.56636   1
  11   1   1 44.2017  1.3824   1
  11   1   2 7.39281 0.45816   1
  11   1   3 1.00821 0.37107   1
  11   1   4 5.74805 0.48731   1
  11   1   5 0.99451 0.38357   1
  11   1   6 9.51952 0.59517   1
  11   1   7 1.63748 0.52999   1
  11   1   8 1.54414 0.59275   1
  11   1   9 1.90717 0.67078   1
  11   1  10  1.6893 1.34848   1
  11   2 -10 0.50957 1.29605   1
  11   2  -9-1.49793 4.03367   1
  11   2  -8-0.10361  2.3401   1
  11   2  -7 3.43018 0.61511   1
  11   2  -6 0.87943 0.52387   1
  11   2  -5   34.79 1.37019   1
  11   2  -4 18.4907   0.723   1
  11   2  -3 3.76685 0.38606   1
  11   2  -2 50.7207 1.52384   1
  11   2  -1  4.3179  0.4191   1
  11   2   0 6.67364 0.46716   1
  11   2   1 38.8095 1.28506   1
  11   2   2 42.7704 1.36761   1
  11   2   3 25.7561 1.04588   1
  11   2   4 58.4408 1.90143   1
  11   2   5 10.8855 0.60963   1
  11   2   6 0.38422 0.46562   1
  11   2   7 4.76493  0.6374   1
  11   2   8 5.09227 0.82536   1
  11   2   9 0.50886 0.76935   1
  11   2  10-0.31554 3.83961   1
  11   3  -9 0.70903 0.89797   1
  11   3  -8-0.10141 3.91854   1
  11   3  -7 3.64843 0.66965   1
  11   3  -6 2.57531 0.58255   1
  11   3  -5 13.7853 0.74098   1
  11   3  -4 7.86682 0.54226   1
  11   3  -3 1.13164 0.38775   1
  11   3  -2 20.1811 0.76688   1
  11   3  -1 27.9067  0.9519   1
  11   3   0 14.3831 0.64166   1
  11   3   1 9.53305 0.60334   1
  11   3   2 40.1164 1.30684   1
  11   3   3 1.62059 0.42871   1
  11   3   4 2.54913 0.43371   1
  11   3   5 9.57205 0.64557   1
  11   3   6 2.37682 0.52704   1
  11   3   7 0.83221 0.59231   1
  11   3   8 0.90054 0.86779   1
  11   3   9 0.08737 0.86234   1
  11   4  -9 1.72458 1.26698   1
  11   4  -8 1.58176 0.97486   1
  11   4  -7 1.20246 0.72306   1
  11   4  -6 4.65604 0.67119   1
  11   4  -5 1.67317 0.60276   1
  11   4  -4  8.5598 0.58524   1
  11   4  -3 19.4653 0.81809   1
  11   4  -2 6.04158 0.48373   1
  11   4  -1 29.8421 1.02819   1
  11   4   0 6.76404 0.48972   1
  11   4   1 10.3686 0.59922   1
  11   4   2 44.8693 1.47804   1
  11   4   3 11.1089 0.65592   1
  11   4   4 3.11826 0.51436   1
  11   4   5 2.39885 0.59919   1
  11   4   6-1.10212 2.08654   1
  11   4   7  0.4522 0.81539   1
  11   4   8 0.66606 0.85369   1
  11   4   9 0.57225 1.06745   1
  11   5  -8-1.12322 3.13526   1
  11   5  -7-0.14522 2.72718   1
  11   5  -6 1.62777 0.66036   1
  11   5  -5 5.61765 0.73184   1
  11   5  -4 4.87032 0.54496   1
  11   5  -3 22.8807 0.96084   1
  11   5  -2 15.4105  0.7278   1
  11   5  -1 22.7554 0.88733   1
  11   5   0 56.1051 1.70346   1
  11   5   1 33.8651 1.14792   1
  11   5   2 3.94867 0.51981   1
  11   5   3 5.90397 0.60066   1
  11   5   4  13.573 0.85368   1
  11   5   5 1.57359 0.55281   1
  11   5   6 2.77452 0.71828   1
  11   5   7 1.32762 0.77276   1
  11   5   8 1.15243 0.98631   1
  11   6  -7 0.53083 0.79129   1
  11   6  -6 4.20404 0.84476   1
  11   6  -5  0.7425 0.80628   1
  11   6  -4  3.8804 0.57488   1
  11   6  -3 11.6301 0.74811   1
  11   6  -2 20.2323 0.91261   1
  11   6  -1  14.457 0.74333   1
  11   6   0 1.32831 0.46826   1
  11   6   1 8.59641 0.67567   1
  11   6   2 3.50673 0.57282   1
  11   6   3 0.99662 0.55498   1
  11   6   4 8.19109   0.759   1
  11   6   5  6.2338 0.74023   1
  11   6   6 3.29919 0.75844   1
  11   6   7 2.95567 1.01982   1
  11   7  -7 1.07495 0.93461   1
  11   7  -6 3.77349 0.87748   1
  11   7  -5  2.8306 0.79532   1
  11   7  -4 0.19767  0.7262   1
  11   7  -3  4.2698 0.90749   1
  11   7  -2 2.18424 0.54529   1
  11   7  -1 1.72922 0.51658   1
  11   7   0 9.06707 0.66704   1
  11   7   1  1.4672 0.58867   1
  11   7   2 1.07685 0.57381   1
  11   7   3 10.3962 0.80799   1
  11   7   4-0.50598 2.46764   1
  11   7   5 0.47494 0.63981   1
  11   7   6 0.47201 0.86592   1
  11   7   7 1.54717 1.00873   1
  11   8  -6 2.68931 0.95497   1
  11   8  -5 3.69808 0.89324   1
  11   8  -4 4.13417 1.12742   1
  11   8  -3 2.38198 0.72318   1
  11   8  -2 2.43301 0.85987   1
  11   8  -1 5.92818 0.68878   1
  11   8   0 2.31308 0.78426   1
  11   8   1  2.1671  0.6641   1
  11   8   2-0.07855 3.57941   1
  11   8   3  6.0681 0.72343   1
  11   8   4 2.26755 0.73216   1
  11   8   5 0.45514  0.7582   1
  11   8   6  0.5679 0.90052   1
  11   9  -4 2.77109 0.91997   1
  11   9  -3 4.85493 0.89131   1
  11   9  -2 2.09097  0.7401   1
  11   9  -1 4.23625 0.89429   1
  11   9   0 2.77913 0.74138   1
  11   9   1 2.96421 0.82946   1
  11   9   2 4.53695  0.8433   1
  11   9   3 3.14778 0.88468   1
  11   9   4  1.9074 0.94946   1
  11  10  -2 4.55337 0.94277   1
  11  10  -1-0.65253 4.52187   1
  11  10   0-0.27085 3.29421   1
  11  10   1 6.22973 1.03084   1
  11  10   2 3.24171 0.96696   1
  12  -6   0 17.1785 1.00166   1
  12  -6   1-0.35181  1.3949   1
  12  -6   2 48.2315 1.41983   1
  12  -6   3 44.3253 1.29353   1
  12  -6   4 14.0683 0.55125   1
  12  -6   5 112.877 3.25374   1
  12  -6   6 17.4251 0.87882   1
  12  -6   7 24.2247 0.99143   1
  12  -6   8 1.12449 0.52791   1
  12  -6   9 2.63923 0.93945   1
  12  -6  10-0.08264 2.62636   1
  12  -5 -10 0.41944 1.02118   1
  12  -5  -9 0.92726 0.66627   1
  12  -5  -8 1.57044 0.62014   1
  12  -5  -7 1.82628 0.56751   1
  12  -5  -6  13.338 0.64307   1
  12  -5  -5 7.59977 0.46187   1
  12  -5  -4 22.8859 0.82488   1
  12  -5  -3  2.0089 0.32182   1
  12  -5  -2 83.5643  2.2831   1
  12  -5  -1 2.65101 0.33717   1
  12  -5   0  10.132 0.56113   1
  12  -5   1 25.2698 1.14825   1
  12  -5   2 30.7082 1.20244   1
  12  -5   3 40.4193 1.25357   1
  12  -5   4 26.5794 0.91352   1
  12  -5   5 18.7091 0.85289   1
  12  -5   6 34.6777 1.38029   1
  12  -5   7 0.98134 0.44205   1
  12  -5   8 7.02028 0.65442   1
  12  -5   9 1.02878 0.79975   1
  12  -5  10 1.82576 1.08427   1
  12  -4 -10 2.25451 1.02959   1
  12  -4  -9 3.85768 0.70441   1
  12  -4  -8 1.30904 0.69183   1
  12  -4  -7 7.58895 0.56249   1
  12  -4  -6  11.219 0.59465   1
  12  -4  -5 3.53768 0.41865   1
  12  -4  -4 2.68402 0.34951   1
  12  -4  -3 73.5502 2.04668   1
  12  -4  -2 0.67481  0.3178   1
  12  -4  -1 18.2107 0.69373   1
  12  -4   0 18.1783  0.6511   1
  12  -4   1 8.91548 0.47203   1
  12  -4   2 21.4218 0.77886   1
  12  -4   3 8.15953  0.4749   1
  12  -4   4 20.1814 0.77536   1
  12  -4   5 19.1002 0.78923   1
  12  -4   6 26.0429 0.93956   1
  12  -4   7 18.9344 0.86655   1
  12  -4   8 3.77107 0.77303   1
  12  -4   9 5.90498 0.73699   1
  12  -4  10-0.91132 2.76879   1
  12  -3 -10-0.44459 2.77183   1
  12  -3  -9 1.96186 0.80602   1
  12  -3  -8  11.903 0.83883   1
  12  -3  -7 9.38862 0.60488   1
  12  -3  -6 6.93114  0.4875   1
  12  -3  -5 54.2264 1.54762   1
  12  -3  -4 30.0114 1.05639   1
  12  -3  -3 8.75709 0.56681   1
  12  -3  -2 2.95437 0.33615   1
  12  -3  -1 29.7066  1.0029   1
  12  -3   0 68.0235 1.93097   1
  12  -3   1 32.2807 1.12304   1
  12  -3   2 22.8391 0.93969   1
  12  -3   3 53.8852 1.52715   1
  12  -3   4 67.7652  1.8869   1
  12  -3   5 36.9607 1.18562   1
  12  -3   6 24.5465 1.03618   1
  12  -3   7 12.0576 0.73627   1
  12  -3   8 0.82388 0.70835   1
  12  -3   9 0.22589 0.60985   1
  12  -3  10 1.88021  0.8252   1
  12  -2 -10 1.93287  0.8538   1
  12  -2  -9-0.21394 2.86246   1
  12  -2  -8-0.54584 2.13871   1
  12  -2  -7 6.62882  0.5643   1
  12  -2  -6 5.47063 0.48495   1
  12  -2  -5 32.7576 1.04814   1
  12  -2  -4 5.38732 0.37916   1
  12  -2  -3 48.4054 1.61355   1
  12  -2  -2 0.24807 0.31053   1
  12  -2  -1 9.65722 0.45325   1
  12  -2   0 4.31932 0.35751   1
  12  -2   1  8.1314 0.44603   1
  12  -2   2 36.4918 1.10809   1
  12  -2   3 71.5729 2.07502   1
  12  -2   4 39.6412 1.20661   1
  12  -2   5 2.09789  0.3908   1
  12  -2   6 8.52253 0.69601   1
  12  -2   7 4.91101 0.60173   1
  12  -2   8 4.35996 0.67278   1
  12  -2   9 0.87756 0.63346   1
  12  -2  10 1.07279 1.04108   1
  12  -1 -10-0.03012 3.26968   1
  12  -1  -9 1.27773 0.81823   1
  12  -1  -8 3.61099 0.59379   1
  12  -1  -7 7.81948 0.61109   1
  12  -1  -6 2.26556 0.45677   1
  12  -1  -5 1.76323 0.38893   1
  12  -1  -4 0.51416 0.32593   1
  12  -1  -3 5.21269  0.4032   1
  12  -1  -2 7.77997 0.45443   1
  12  -1  -1 30.5087 1.11353   1
  12  -1   0  12.904 0.57434   1
  12  -1   1 42.2937 1.31212   1
  12  -1   2 7.18034 0.46083   1
  12  -1   3  0.4641  0.3535   1
  12  -1   4 6.30706 0.54373   1
  12  -1   5 0.84123 0.35253   1
  12  -1   6 9.52123  0.6092   1
  12  -1   7 1.99973  0.5209   1
  12  -1   8 2.38146 0.60784   1
  12  -1   9 2.44131 0.72291   1
  12  -1  10 0.68393 0.98796   1
  12   0 -10 -1.3216 3.69225   1
  12   0  -9-0.06479 2.59383   1
  12   0  -8 0.31716 0.61946   1
  12   0  -7 2.87857 0.55905   1
  12   0  -6 2.80955 0.47294   1
  12   0  -5   3.557 0.42148   1
  12   0  -4 0.56781 0.35569   1
  12   0  -3 1.48748 0.35229   1
  12   0  -2 17.0236 0.67237   1
  12   0  -1 3.62328 0.41842   1
  12   0   0 6.08117 0.44923   1
  12   0   1 0.25685 0.33931   1
  12   0   2 9.77073 0.51138   1
  12   0   3 7.50311 0.48817   1
  12   0   4  58.248 2.12681   1
  12   0   5 23.2055 0.87455   1
  12   0   6 0.11079 0.42577   1
  12   0   7 0.39409 0.51433   1
  12   0   8-0.10842 2.40882   1
  12   0   9 1.05459 1.00503   1
  12   0  10 0.08677 1.43731   1
  12   1  -9 0.07104 0.97846   1
  12   1  -8 1.67651 0.68921   1
  12   1  -7 3.82043 0.96169   1
  12   1  -6 0.28099 0.50865   1
  12   1  -5 25.8447 0.97013   1
  12   1  -4 15.2485 0.69249   1
  12   1  -3  9.3574 0.52418   1
  12   1  -2  10.993 0.55524   1
  12   1  -1  8.8744 0.53821   1
  12   1   0  20.523 0.79013   1
  12   1   1 27.1115 0.99618   1
  12   1   2 82.0371 2.29921   1
  12   1   3 5.80585 0.49135   1
  12   1   4 2.37015 0.42888   1
  12   1   5 17.7121 0.82229   1
  12   1   6 0.92675 0.52098   1
  12   1   7 1.98121 0.62159   1
  12   1   8 0.54112 0.62472   1
  12   1   9 4.22456 1.15833   1
  12   2  -9 1.01196 1.12969   1
  12   2  -8 1.13774 0.95094   1
  12   2  -7 1.66075 0.65558   1
  12   2  -6 0.56438 0.73729   1
  12   2  -5 14.0831 0.79522   1
  12   2  -4 18.2854 0.78405   1
  12   2  -3 2.12595 0.39276   1
  12   2  -2 2.96478 0.41824   1
  12   2  -1 1.83655  0.3768   1
  12   2   0 54.7633 1.65144   1
  12   2   1 2.28732 0.39499   1
  12   2   2-0.23989 1.66877   1
  12   2   3 1.19363 0.43475   1
  12   2   4 1.74347 0.43876   1
  12   2   5-0.06489 2.31417   1
  12   2   6 0.64657 0.49936   1
  12   2   7-0.71343 3.06193   1
  12   2   8 0.13154 0.70944   1
  12   2   9 0.30695 0.92841   1
  12   3  -8-0.30404 3.25428   1
  12   3  -7   -0.53 2.61468   1
  12   3  -6 1.24007 0.69209   1
  12   3  -5 4.11583 0.58911   1
  12   3  -4 14.2334 0.76095   1
  12   3  -3 13.3418 0.66774   1
  12   3  -2 10.7499 0.59578   1
  12   3  -1  10.422 0.59779   1
  12   3   0 15.9217 0.73383   1
  12   3   1 13.1426 0.66256   1
  12   3   2 3.51878 0.48444   1
  12   3   3  7.0059 0.57247   1
  12   3   4 7.28346 0.68849   1
  12   3   5 2.40455 0.51699   1
  12   3   6   0.147 0.55375   1
  12   3   7 0.55577 0.76346   1
  12   3   8 8.09725 0.99743   1
  12   4  -8-0.26743 3.79193   1
  12   4  -7 0.50017 1.26579   1
  12   4  -6 1.07875 0.68907   1
  12   4  -5 0.17866 0.60774   1
  12   4  -4 0.09182 0.49948   1
  12   4  -3  19.084 0.86351   1
  12   4  -2 16.6135  0.8816   1
  12   4  -1 14.1008 0.70341   1
  12   4   0 2.51544  0.4672   1
  12   4   1 0.32744 0.46348   1
  12   4   2  1.3292 0.58644   1
  12   4   3 12.8404 0.77981   1
  12   4   4 0.75909 0.53515   1
  12   4   5  1.9713 0.58989   1
  12   4   6 6.17685 0.77625   1
  12   4   7 0.32831 0.70442   1
  12   4   8-0.48209 3.28713   1
  12   5  -7 0.23042 0.86078   1
  12   5  -6  3.0339 0.77306   1
  12   5  -5 0.37527  0.8935   1
  12   5  -4 2.76246 0.64458   1
  12   5  -3 0.70557 0.49494   1
  12   5  -2 0.81801  0.4983   1
  12   5  -1 2.08034 0.50696   1
  12   5   0 18.9704  0.8704   1
  12   5   1 14.9178 0.78482   1
  12   5   2 0.25075 0.73263   1
  12   5   3 0.50411  0.5917   1
  12   5   4 0.05635  0.7852   1
  12   5   5 1.37951 0.68195   1
  12   5   6-0.28188  2.8321   1
  12   5   7 1.69703 0.96336   1
  12   6  -6 4.17772  1.1461   1
  12   6  -5 2.42054 0.97221   1
  12   6  -4 3.04253 0.70583   1
  12   6  -3 -0.2246 2.49548   1
  12   6  -2 14.6551 0.84645   1
  12   6  -1 9.07519 0.68913   1
  12   6   0 5.99744 0.64506   1
  12   6   1  4.4707 0.67186   1
  12   6   2 6.47632  0.7436   1
  12   6   3 2.15697 0.65076   1
  12   6   4 1.71502 0.93011   1
  12   6   5  2.1454 0.69296   1
  12   6   6 0.86962 0.87057   1
  12   7  -5 9.73839 1.19231   1
  12   7  -4 0.72434 0.79496   1
  12   7  -3  0.0607 0.71586   1
  12   7  -2 3.57701 0.64533   1
  12   7  -1 11.6691 0.83254   1
  12   7   0 1.40205  0.6607   1
  12   7   1 2.84239 0.84576   1
  12   7   2 3.86119 0.91258   1
  12   7   3  2.7631 0.70131   1
  12   7   4    2.22 1.48435   1
  12   7   5-0.27657 3.18986   1
  12   8  -4 5.58246 0.99222   1
  12   8  -3 1.89629 0.85968   1
  12   8  -2 3.69969 0.98579   1
  12   8  -1 5.97886 0.93962   1
  12   8   0 1.90331 0.76556   1
  12   8   1 11.9313 1.05809   1
  12   8   2-0.81438 3.03607   1
  12   8   3 10.0777 1.07129   1
  12   8   4 1.41741 1.03944   1
  12   9  -2   6.581 1.00932   1
  12   9  -1 4.39001 0.97598   1
  12   9   0 2.23815 0.92461   1
  12   9   1 3.83322  1.1357   1
  12   9   2 3.35158 1.11003   1
  13  -6 -10 1.24049 0.89488   1
  13  -6  -9 2.80075 0.86978   1
  13  -6  -8-0.56262 2.33815   1
  13  -6  -7 1.47256  0.5582   1
  13  -6  -6 11.7666 0.65052   1
  13  -6  -5 8.08322 0.52394   1
  13  -6  -4 32.5155 1.09623   1
  13  -6  -3 162.901 4.36922   1
  13  -6  -2 32.9777 1.08472   1
  13  -6  -1 6.20113 0.43928   1
  13  -6   0 34.2299 1.07963   1
  13  -6   1  33.179 1.13541   1
  13  -6   2 15.6668 0.68785   1
  13  -6   3 53.7236 1.60082   1
  13  -6   4 8.83629 0.60149   1
  13  -6   5 5.59495 0.47948   1
  13  -6   6 1.89714 0.48759   1
  13  -6   7 1.40025 0.70718   1
  13  -6   8 3.33994 0.67121   1
  13  -6   9 5.08301 0.88594   1
  13  -6  10  1.2532 1.17851   1
  13  -5 -10-0.86264 3.19518   1
  13  -5  -9-1.32385 2.51004   1
  13  -5  -8 2.00696 0.64408   1
  13  -5  -7 11.2142 0.74061   1
  13  -5  -6 0.74568 0.42117   1
  13  -5  -5 71.2168 2.16498   1
  13  -5  -4 0.61646 0.35075   1
  13  -5  -3 0.14379 0.32852   1
  13  -5  -2 72.1519  2.1045   1
  13  -5  -1 2.86789 0.35905   1
  13  -5   0 58.7609 1.66464   1
  13  -5   1 19.5151 0.74568   1
  13  -5   2 7.44358 0.48858   1
  13  -5   3 65.8641 2.09906   1
  13  -5   4 66.7397 1.92352   1
  13  -5   5 16.1831 0.71241   1
  13  -5   6  12.652 0.69249   1
  13  -5   7 4.90812 0.60088   1
  13  -5   8 1.91969 0.58325   1
  13  -5   9-0.16103 2.57598   1
  13  -5  10 0.08503 1.03843   1
  13  -4 -10-2.47296 3.09868   1
  13  -4  -9 1.92297 0.97637   1
  13  -4  -8 0.18673 1.00884   1
  13  -4  -7 3.49346 0.59518   1
  13  -4  -6 2.08697 0.44494   1
  13  -4  -5 2.38685 0.38984   1
  13  -4  -4 24.9069 0.86086   1
  13  -4  -3 8.31968 0.48862   1
  13  -4  -2 8.47296 0.48063   1
  13  -4  -1 2.95004 0.36456   1
  13  -4   0 44.8827 1.57576   1
  13  -4   1 100.004 2.70283   1
  13  -4   2 64.8109 2.07928   1
  13  -4   3  32.291 1.14243   1
  13  -4   4 23.4375 0.83945   1
  13  -4   5-0.18023 1.67366   1
  13  -4   6 3.83014 0.47884   1
  13  -4   7 1.87183 0.54845   1
  13  -4   8 7.43433 0.75204   1
  13  -4   9-0.36635 2.47709   1
  13  -4  10 1.05742 0.90297   1
  13  -3 -10 0.51498 0.89787   1
  13  -3  -9 4.27328 1.00982   1
  13  -3  -8 1.06667 0.78876   1
  13  -3  -7   8.798 0.64614   1
  13  -3  -6-0.02393 1.92351   1
  13  -3  -5 10.5893 0.55845   1
  13  -3  -4 28.8698 0.94595   1
  13  -3  -3 16.4342 0.68722   1
  13  -3  -2 7.37629 0.44702   1
  13  -3  -1  52.192 1.63869   1
  13  -3   0 9.04243 0.48633   1
  13  -3   1 27.9799 0.89701   1
  13  -3   2 45.1639 1.35566   1
  13  -3   3 32.3869 1.41214   1
  13  -3   4 13.7669 0.77951   1
  13  -3   5 0.75278 0.38679   1
  13  -3   6 -0.2396 1.73413   1
  13  -3   7 6.31714 0.64714   1
  13  -3   8 2.43958 0.79734   1
  13  -3   9-0.43689 2.63678   1
  13  -3  10-0.00815 3.93849   1
  13  -2 -10 1.17974 0.98121   1
  13  -2  -9 0.28906 1.23065   1
  13  -2  -8 1.20817  0.8238   1
  13  -2  -7 3.35163 0.54273   1
  13  -2  -6 0.86419 0.43629   1
  13  -2  -5 38.5933 1.32519   1
  13  -2  -4 18.1961 0.68662   1
  13  -2  -3 4.15302 0.40335   1
  13  -2  -2 50.5239 1.68674   1
  13  -2  -1 4.97363 0.40047   1
  13  -2   0 7.07027 0.43666   1
  13  -2   1 40.2815 1.25048   1
  13  -2   2 43.7668 1.35555   1
  13  -2   3 25.4127 0.88808   1
  13  -2   4  57.917 1.71997   1
  13  -2   5 11.1755 0.58567   1
  13  -2   6 0.81219 0.47306   1
  13  -2   7 3.57652 0.66162   1
  13  -2   8 5.06081 0.73484   1
  13  -2   9 1.61401 0.79916   1
  13  -2  10-1.27088  3.0858   1
  13  -1  -9 1.41688 0.97147   1
  13  -1  -8 2.65263 0.72747   1
  13  -1  -7 3.69497 0.54915   1
  13  -1  -6 0.75052 0.46313   1
  13  -1  -5 27.8764 1.00396   1
  13  -1  -4 15.2529 0.71466   1
  13  -1  -3 9.31428 0.51283   1
  13  -1  -2 10.5487 0.55201   1
  13  -1  -1 9.43288 0.50275   1
  13  -1   0 21.8958 0.77003   1
  13  -1   1 25.7949 0.91697   1
  13  -1   2 80.3822 2.33483   1
  13  -1   3 5.88179 0.47365   1
  13  -1   4  2.4005 0.46902   1
  13  -1   5 17.1504 0.76529   1
  13  -1   6 1.00465 0.47026   1
  13  -1   7 1.91052 0.61241   1
  13  -1   8 0.46592 0.69076   1
  13  -1   9 2.46099 0.82322   1
  13   0  -9 3.50352 0.98618   1
  13   0  -8 2.88772 0.89214   1
  13   0  -7 2.04764  0.9213   1
  13   0  -6 -0.8028 2.37515   1
  13   0  -5 9.38059 0.58571   1
  13   0  -4  3.5093 0.45278   1
  13   0  -3 0.37587 0.37322   1
  13   0  -2  2.4881 0.43333   1
  13   0  -1    2.36 0.46004   1
  13   0   0 103.473 3.10893   1
  13   0   1 4.17917  0.4496   1
  13   0   2 2.61603 0.42491   1
  13   0   3 81.3171 2.32341   1
  13   0   4 0.18842 0.42905   1
  13   0   5 -0.1688 2.10912   1
  13   0   6 0.73375 0.53499   1
  13   0   7 0.58735 0.57495   1
  13   0   8 1.73187  0.7835   1
  13   0   9 16.9465 1.29212   1
  13   1  -9-1.06615 4.92223   1
  13   1  -8-0.01082 3.34536   1
  13   1  -7 6.50247 0.81356   1
  13   1  -6 1.82406 0.69617   1
  13   1  -5 0.45278 0.47635   1
  13   1  -4 9.77923 0.63435   1
  13   1  -3  4.7677 0.47591   1
  13   1  -2 51.3409 1.57684   1
  13   1  -1 32.8539 1.15346   1
  13   1   0 3.01747 0.44921   1
  13   1   1 11.8317 0.66087   1
  13   1   2 16.2463 0.73028   1
  13   1   3 17.0607 0.74939   1
  13   1   4 0.76902 0.43254   1
  13   1   5 1.40311 0.48726   1
  13   1   6-0.29006 2.24359   1
  13   1   7 1.24241 0.85306   1
  13   1   8 3.86875 0.81878   1
  13   1   9-0.67054 3.68445   1
  13   2  -8 2.75618 0.94004   1
  13   2  -7 3.32358 0.76948   1
  13   2  -6 3.82164 0.66088   1
  13   2  -5 12.9626 0.78863   1
  13   2  -4 2.71246 0.53335   1
  13   2  -3 1.73907 0.46419   1
  13   2  -2 8.22674 0.55496   1
  13   2  -1 -0.0537 1.81363   1
  13   2   0 2.97046 0.46032   1
  13   2   1 11.8666 0.66754   1
  13   2   2 1.50259 0.46638   1
  13   2   3 5.03879 0.58027   1
  13   2   4-0.57501 2.45593   1
  13   2   5 0.99801 0.52564   1
  13   2   6 6.34081 0.68122   1
  13   2   7 0.65542 0.70031   1
  13   2   8 1.59684 0.93825   1
  13   3  -8 2.85739 1.27809   1
  13   3  -7 6.20991 0.91218   1
  13   3  -6-0.88201 2.52613   1
  13   3  -5 6.51901 0.72573   1
  13   3  -4 7.12194 0.69726   1
  13   3  -3 0.93893 0.48661   1
  13   3  -2 14.9665 0.74702   1
  13   3  -1 12.7772 0.68589   1
  13   3   0 7.44021 0.60805   1
  13   3   1 3.06814 0.51943   1
  13   3   2 1.84281 0.69765   1
  13   3   3 5.22463 0.63477   1
  13   3   4 1.70604 0.61987   1
  13   3   5 0.15221 0.62269   1
  13   3   6  3.2932 0.70159   1
  13   3   7-1.06223 2.78667   1
  13   3   8-0.26769 3.33699   1
  13   4  -7 0.75208 0.94747   1
  13   4  -6-0.98329  2.7897   1
  13   4  -5 1.57818 0.65203   1
  13   4  -4 4.54526 0.66006   1
  13   4  -3 1.80056 0.52107   1
  13   4  -2 7.23156 0.66092   1
  13   4  -1 15.1602 0.80775   1
  13   4   0 23.8196 1.05849   1
  13   4   1 20.1368 1.01312   1
  13   4   2 3.21084 0.65497   1
  13   4   3 6.73907 0.76849   1
  13   4   4 2.99971 0.70323   1
  13   4   5 0.32891 0.66038   1
  13   4   6-0.05182 3.33436   1
  13   4   7-0.28467 3.23976   1
  13   5  -6 0.62011 0.84799   1
  13   5  -5 1.91082 0.74729   1
  13   5  -4  5.8208 0.87995   1
  13   5  -3 2.08727 0.63915   1
  13   5  -2 0.45583 0.54246   1
  13   5  -1 11.1857 0.79286   1
  13   5   0 0.57514 0.58164   1
  13   5   1 4.07657 0.67599   1
  13   5   2 3.60507 0.79517   1
  13   5   3 5.19994  0.7767   1
  13   5   4 3.88109 0.84382   1
  13   5   5 1.05451 0.80448   1
  13   5   6 4.95675 0.96216   1
  13   6  -5  4.9603 0.96933   1
  13   6  -4 3.01796 0.92648   1
  13   6  -3 0.32292 0.72164   1
  13   6  -2 4.62951 0.82292   1
  13   6  -1-0.81222 2.66517   1
  13   6   0 1.70995 0.68132   1
  13   6   1 5.56812 0.79093   1
  13   6   2 0.24304 0.93769   1
  13   6   3 2.36462 0.80002   1
  13   6   4 4.50118 0.98192   1
  13   6   5 3.62823 0.93603   1
  13   7  -4 1.01547 0.90148   1
  13   7  -3 2.06428 1.08776   1
  13   7  -2 5.40496 0.82279   1
  13   7  -1 3.98735 0.96912   1
  13   7   0 0.81297 0.94856   1
  13   7   1 4.35885 0.92815   1
  13   7   2  -0.358 3.01669   1
  13   7   3 3.55839 1.05005   1
  13   7   4 4.25312  1.3175   1
  13   8  -2 3.20371 1.17763   1
  13   8  -1 1.55385 1.16189   1
  13   8   0 1.97806 1.47221   1
  13   8   1 5.21203 1.40797   1
  13   8   2  3.6075 1.04367   1
  14  -7   0 121.175 4.01464   1
  14  -7   1 38.8957 1.49246   1
  14  -7   2 5.55717 0.43686   1
  14  -7   3 11.8368 0.59481   1
  14  -7   4 4.91212 0.47289   1
  14  -7   5  11.131 0.62023   1
  14  -7   6 9.09225  0.6389   1
  14  -7   7 3.50055 0.62362   1
  14  -7   8 0.91065 0.67132   1
  14  -7   9 2.18555   1.201   1
  14  -7  10 2.48687 1.40077   1
  14  -6 -10 1.09865 1.86355   1
  14  -6  -9 1.89296 1.00358   1
  14  -6  -8 1.12451 0.94665   1
  14  -6  -7 5.06645  0.6236   1
  14  -6  -6 4.14163 0.58764   1
  14  -6  -5 4.82111 0.50304   1
  14  -6  -4 0.30387 0.40339   1
  14  -6  -3 14.8394 0.67094   1
  14  -6  -2 32.3982 1.07049   1
  14  -6  -1 1.64275 0.37574   1
  14  -6   0 14.9612 0.64518   1
  14  -6   1 73.3913 2.25617   1
  14  -6   2 36.7518   1.327   1
  14  -6   3 23.7177 0.90321   1
  14  -6   4 3.27797 0.46635   1
  14  -6   5 8.75982 0.56008   1
  14  -6   6 1.78619  0.5093   1
  14  -6   7 5.58549 0.66671   1
  14  -6   8 0.65991 0.64184   1
  14  -6   9 1.59505 0.76081   1
  14  -6  10 0.04131 1.00148   1
  14  -5  -9 1.16257 0.83511   1
  14  -5  -8 0.29946 1.36622   1
  14  -5  -7-0.25372 2.33766   1
  14  -5  -6 5.52284 0.56888   1
  14  -5  -5 21.1354 0.87615   1
  14  -5  -4 15.9674 0.69912   1
  14  -5  -3 14.3961 0.62218   1
  14  -5  -2 38.8519 1.43659   1
  14  -5  -1 10.4698 0.52965   1
  14  -5   0 24.4131 0.91086   1
  14  -5   1 6.45153 0.46285   1
  14  -5   2 53.2016 1.61628   1
  14  -5   3 2.81378 0.41226   1
  14  -5   4 31.1871 1.11737   1
  14  -5   5 4.61589 0.52301   1
  14  -5   6 0.49622 0.55576   1
  14  -5   7  1.4495 0.68394   1
  14  -5   8 0.84767 0.69907   1
  14  -5   9 0.98863 0.80029   1
  14  -4  -9-0.89681 2.98326   1
  14  -4  -8 0.64785 0.72121   1
  14  -4  -7 1.69777 0.59727   1
  14  -4  -6 6.84906 0.61121   1
  14  -4  -5 2.75728 0.42085   1
  14  -4  -4  2.1889 0.41244   1
  14  -4  -3 2.84488 0.39191   1
  14  -4  -2 46.7388 1.40501   1
  14  -4  -1  0.6397 0.36472   1
  14  -4   0 21.5325 0.76629   1
  14  -4   1 97.6971 2.66123   1
  14  -4   2 30.1882 1.03531   1
  14  -4   3 11.0652 0.60008   1
  14  -4   4 25.8591 0.98132   1
  14  -4   5 12.1442 0.69791   1
  14  -4   6 2.99553 0.52001   1
  14  -4   7 0.27078 0.70723   1
  14  -4   8 3.25738 0.72293   1
  14  -4   9-1.03454 2.73087   1
  14  -3  -9 1.47298 0.85924   1
  14  -3  -8 1.53223 0.85634   1
  14  -3  -7 3.97096 0.71032   1
  14  -3  -6 2.97236 0.52747   1
  14  -3  -5 13.6288   0.658   1
  14  -3  -4  7.7746 0.50582   1
  14  -3  -3 1.86651 0.38114   1
  14  -3  -2 20.6826 0.78077   1
  14  -3  -1 28.3516 1.00781   1
  14  -3   0 15.6181 0.65002   1
  14  -3   1 9.60097 0.54375   1
  14  -3   2 42.8246  1.3944   1
  14  -3   3 1.31855 0.40108   1
  14  -3   4 2.02039 0.42107   1
  14  -3   5 9.13599 0.59971   1
  14  -3   6 2.47553 0.53071   1
  14  -3   7  0.3177 0.60298   1
  14  -3   8 0.90984 0.82379   1
  14  -3   9 0.02125   0.749   1
  14  -2  -9-0.11029 3.16979   1
  14  -2  -8 0.70869 0.72929   1
  14  -2  -7 1.08743 0.58726   1
  14  -2  -6 1.83038 0.47782   1
  14  -2  -5  13.604 0.68187   1
  14  -2  -4 17.9735 0.74428   1
  14  -2  -3 2.18501 0.39472   1
  14  -2  -2 3.67208 0.43892   1
  14  -2  -1 2.35918  0.3804   1
  14  -2   0 54.0417 1.59296   1
  14  -2   1 1.88349 0.42299   1
  14  -2   2  0.3537 0.39324   1
  14  -2   3 1.25856 0.47974   1
  14  -2   4 1.89096 0.41815   1
  14  -2   5 1.10882 0.40964   1
  14  -2   6 0.66957 0.50882   1
  14  -2   7 -0.2806 2.48084   1
  14  -2   8 0.77128 0.72001   1
  14  -2   9 2.53866 0.84307   1
  14  -1  -9 0.36229 1.01899   1
  14  -1  -8  0.3076 0.86172   1
  14  -1  -7  6.8319 0.79443   1
  14  -1  -6 0.51724 0.51567   1
  14  -1  -5-0.16995 2.42251   1
  14  -1  -4 10.1017 0.63528   1
  14  -1  -3 5.07584 0.48918   1
  14  -1  -2 50.4144 1.54412   1
  14  -1  -1 32.4347 1.28814   1
  14  -1   0 3.30168 0.42208   1
  14  -1   1 12.2474 0.64636   1
  14  -1   2 16.1544 0.73732   1
  14  -1   3 17.2702 0.77789   1
  14  -1   4 0.07946 0.46822   1
  14  -1   5 0.07835 0.59855   1
  14  -1   6-0.31622 2.17616   1
  14  -1   7  2.1463 0.77507   1
  14  -1   8 2.76355 0.81203   1
  14  -1   9-0.64013  3.0701   1
  14   0  -8 -0.6585 3.13781   1
  14   0  -7 3.93631 1.12437   1
  14   0  -6-0.64992 2.29997   1
  14   0  -5 3.34595 0.52242   1
  14   0  -4  16.717 0.77883   1
  14   0  -3 6.30316 0.54458   1
  14   0  -2 1.44498 0.44287   1
  14   0  -1 22.8116 0.96167   1
  14   0   0  64.015 2.01408   1
  14   0   1 15.1382 0.75258   1
  14   0   2 38.8703 1.50328   1
  14   0   3 5.14549 0.53107   1
  14   0   4 12.5963 0.73298   1
  14   0   5 5.51785  0.5937   1
  14   0   6 0.22087  0.5438   1
  14   0   7 0.90513 0.82495   1
  14   0   8  3.4265 1.01398   1
  14   1  -8 3.81191 1.26362   1
  14   1  -7 7.54805  0.9359   1
  14   1  -6 5.42257 0.82154   1
  14   1  -5 25.7801 1.12483   1
  14   1  -4 6.93106  0.6411   1
  14   1  -3  32.156 1.22871   1
  14   1  -2 11.8905 0.68641   1
  14   1  -1 9.14156 0.64565   1
  14   1   0 52.7285 1.75266   1
  14   1   1 0.36824  0.4598   1
  14   1   2 23.6252 0.98622   1
  14   1   3 3.26543 0.60907   1
  14   1   4 4.29143 0.56454   1
  14   1   5-0.72029 2.21668   1
  14   1   6  0.0196 0.58916   1
  14   1   7  0.2692 0.75621   1
  14   1   8 4.96562 0.96905   1
  14   2  -7 9.64344 1.02198   1
  14   2  -6 7.86898 0.84973   1
  14   2  -5 1.38718 0.57327   1
  14   2  -4 24.6781  1.1452   1
  14   2  -3 2.68076 0.56317   1
  14   2  -2 5.01623 0.58655   1
  14   2  -1 4.62716 0.57043   1
  14   2   0 8.50941 0.65242   1
  14   2   1 3.60657 0.55087   1
  14   2   2 4.35378 0.61852   1
  14   2   3  2.6135 0.58486   1
  14   2   4 0.12606 0.62001   1
  14   2   5 8.28961 0.75747   1
  14   2   6 3.92166 0.75293   1
  14   2   7 0.09934 0.91176   1
  14   3  -7 4.08346 1.01825   1
  14   3  -6 8.15883 0.91623   1
  14   3  -5 5.95949 0.81517   1
  14   3  -4 1.16936 0.60808   1
  14   3  -3 7.34416 0.69427   1
  14   3  -2 4.49107 0.70833   1
  14   3  -1 12.4986 0.78938   1
  14   3   0 0.35933 0.57616   1
  14   3   1  2.2933 0.61142   1
  14   3   2 3.71915 0.64854   1
  14   3   3 1.63564 0.69212   1
  14   3   4 3.06154 0.81286   1
  14   3   5 9.55004 0.94717   1
  14   3   6 1.10117 0.88746   1
  14   3   7-0.47517 3.22926   1
  14   4  -6-0.95712 3.95356   1
  14   4  -5 0.60565 0.76422   1
  14   4  -4 0.46666 0.68461   1
  14   4  -3 2.21588 0.79465   1
  14   4  -2 0.76213  0.6045   1
  14   4  -1 0.38919 0.56289   1
  14   4   0 7.81773  0.7224   1
  14   4   1  4.6285 0.69997   1
  14   4   2-0.42393 2.71374   1
  14   4   3 1.86116 0.78288   1
  14   4   4 0.15498 0.78711   1
  14   4   5 0.62189 0.82354   1
  14   4   6 0.48176 0.93328   1
  14   5  -5 1.11707 1.19031   1
  14   5  -4 3.46418 1.16246   1
  14   5  -3 0.34115 0.70847   1
  14   5  -2 1.39813 0.88429   1
  14   5  -1 3.52048 0.82565   1
  14   5   0 1.39462 0.69593   1
  14   5   1 1.76948 0.83592   1
  14   5   2-0.12581 3.60324   1
  14   5   3 3.68197 0.92771   1
  14   5   4-0.77581 3.53249   1
  14   5   5 0.67185 1.45666   1
  14   6  -3  0.3241 0.98718   1
  14   6  -2 4.57159 1.06822   1
  14   6  -1-1.50838  3.5024   1
  14   6   0 4.28869 1.09047   1
  14   6   1 1.74064 1.07997   1
  14   6   2 3.73805 1.02258   1
  14   6   3 1.95042 1.04418   1
  14   7  -1 1.19245 1.04923   1
  14   7   0 16.3685 1.52808   1
  14   7   1 3.79582 1.09141   1
  15  -7  -9 0.69215 1.07315   1
  15  -7  -8 1.63247  0.7757   1
  15  -7  -7 3.26619 0.69952   1
  15  -7  -6  3.8652   0.662   1
  15  -7  -5  9.3631 0.62791   1
  15  -7  -4 15.7095 0.74952   1
  15  -7  -3 0.49415 0.40559   1
  15  -7  -2 12.0431 0.62601   1
  15  -7  -1 2.48658 0.42763   1
  15  -7   0 5.24308 0.48007   1
  15  -7   1 18.7267 0.75519   1
  15  -7   2 47.8231 1.55891   1
  15  -7   3 8.20975 0.54026   1
  15  -7   4  1.7977 0.45978   1
  15  -7   5 21.0875 0.94786   1
  15  -7   6 3.02534 0.58345   1
  15  -7   7 3.56591 0.66561   1
  15  -7   8  2.2528 0.71852   1
  15  -7   9-0.41121 3.07899   1
  15  -6  -9-0.47411 4.15354   1
  15  -6  -8-0.44786 2.93406   1
  15  -6  -7  2.8377 0.68503   1
  15  -6  -6 5.98997 0.62114   1
  15  -6  -5 0.63513 0.47414   1
  15  -6  -4  6.5187 0.55974   1
  15  -6  -3 1.64559 0.40685   1
  15  -6  -2 10.6569 0.60928   1
  15  -6  -1 13.0037 0.61369   1
  15  -6   0 37.6379 1.27046   1
  15  -6   1 29.9053 1.05519   1
  15  -6   2  19.536 0.99669   1
  15  -6   3 42.6457 1.38274   1
  15  -6   4 12.6949 0.71116   1
  15  -6   5 4.66382 0.57341   1
  15  -6   6-0.08715 2.14076   1
  15  -6   7 0.27905 0.74942   1
  15  -6   8 1.56035 0.84618   1
  15  -6   9 0.55513 0.86865   1
  15  -5  -9 1.25472 0.92471   1
  15  -5  -8-2.12265 2.62009   1
  15  -5  -7 5.08372 0.75201   1
  15  -5  -6 2.60243 0.55498   1
  15  -5  -5 11.1755 0.75528   1
  15  -5  -4 3.36094  0.4859   1
  15  -5  -3 4.64697 0.49087   1
  15  -5  -2 16.0591 0.69644   1
  15  -5  -1 27.8694 1.01475   1
  15  -5   0 8.05836 0.50331   1
  15  -5   1 19.6777 0.89189   1
  15  -5   2  36.336 1.20099   1
  15  -5   3 28.1351 1.03386   1
  15  -5   4 15.9195  0.7762   1
  15  -5   5 12.8552 0.73904   1
  15  -5   6-0.50317 2.71613   1
  15  -5   7 6.35989 0.78726   1
  15  -5   8  2.6075 0.77176   1
  15  -5   9 0.72595 0.93469   1
  15  -4  -9-0.02512 4.25428   1
  15  -4  -8 0.49615 0.92162   1
  15  -4  -7  1.7226 0.93311   1
  15  -4  -6 5.34465 0.65613   1
  15  -4  -5 1.59056 0.47537   1
  15  -4  -4  8.2721 0.58762   1
  15  -4  -3 19.7392 0.82925   1
  15  -4  -2  6.1053 0.47734   1
  15  -4  -1 29.5927   1.023   1
  15  -4   0 6.16399 0.49415   1
  15  -4   1 10.0334 0.61026   1
  15  -4   2 46.3397 1.49676   1
  15  -4   3 11.8013 0.67579   1
  15  -4   4 2.47967 0.49236   1
  15  -4   5 2.34751 0.52282   1
  15  -4   6 0.24131 0.65043   1
  15  -4   7-0.05375 2.44133   1
  15  -4   8 0.71542 0.98451   1
  15  -4   9  1.6936  0.8968   1
  15  -3  -8 0.83918 1.11145   1
  15  -3  -7 0.10567 0.60103   1
  15  -3  -6  0.6744 0.68879   1
  15  -3  -5 5.26626  0.5821   1
  15  -3  -4 15.2781 0.74438   1
  15  -3  -3 13.7282 0.68572   1
  15  -3  -2 10.7037 0.66539   1
  15  -3  -1 10.9258 0.65477   1
  15  -3   0 16.4227 0.74816   1
  15  -3   1 13.9892 0.68398   1
  15  -3   2 4.30472 0.50601   1
  15  -3   3 6.70582 0.56046   1
  15  -3   4 6.39059 0.56162   1
  15  -3   5  1.6493 0.46465   1
  15  -3   6 0.77272 0.62104   1
  15  -3   7 0.45024  0.8236   1
  15  -3   8  9.4262 1.01254   1
  15  -2  -8 2.74738 0.97476   1
  15  -2  -7 3.20157  0.8174   1
  15  -2  -6 3.68796 0.65245   1
  15  -2  -5 12.5829 0.79518   1
  15  -2  -4 2.17593 0.52509   1
  15  -2  -3 2.59128 0.47692   1
  15  -2  -2 8.87871 0.60553   1
  15  -2  -1-0.08366 1.84806   1
  15  -2   0 2.32667 0.50701   1
  15  -2   1 12.0915 0.65722   1
  15  -2   2 0.84851 0.43331   1
  15  -2   3 5.84447 0.56504   1
  15  -2   4 0.50767 0.46297   1
  15  -2   5 0.39109 0.63421   1
  15  -2   6 6.05466 0.73657   1
  15  -2   7 0.95017 1.03361   1
  15  -2   8  1.2586 0.82217   1
  15  -1  -8 4.83848  0.9934   1
  15  -1  -7 8.46616  1.0021   1
  15  -1  -6 4.41848 0.73377   1
  15  -1  -5 25.7832 1.12005   1
  15  -1  -4 6.74623  0.5954   1
  15  -1  -3 31.3431 1.22022   1
  15  -1  -2 12.6681 0.70098   1
  15  -1  -1 10.5229 0.67681   1
  15  -1   0 55.0199 1.76233   1
  15  -1   1  0.2188 0.60843   1
  15  -1   2 24.1785 0.98398   1
  15  -1   3 3.16129 0.68644   1
  15  -1   4 3.73496 0.58661   1
  15  -1   5 0.43801  0.6281   1
  15  -1   6 1.78592 0.80714   1
  15  -1   7 1.21985 0.84126   1
  15  -1   8 4.06545  0.9536   1
  15   0  -7 10.3602 1.62412   1
  15   0  -6-0.78783  3.0855   1
  15   0  -5-0.06571 2.92766   1
  15   0  -4 5.99022 0.67808   1
  15   0  -3 5.15108  0.6183   1
  15   0  -2  26.194 1.09201   1
  15   0  -1 41.6681 1.51465   1
  15   0   0 13.3437 0.77836   1
  15   0   1  5.4662 0.57002   1
  15   0   2 4.21773 0.58837   1
  15   0   3 0.11237 0.51317   1
  15   0   4-0.06722 2.19299   1
  15   0   5 2.43658 0.61828   1
  15   0   6 0.06655 0.63341   1
  15   0   7 3.32977 0.83804   1
  15   1  -7 5.21222  1.1299   1
  15   1  -6 7.36709 0.86352   1
  15   1  -5 0.18089 0.60743   1
  15   1  -4 3.74061 0.78792   1
  15   1  -3  6.4022 0.71324   1
  15   1  -2 2.50922 0.58032   1
  15   1  -1 30.4029  1.2245   1
  15   1   0 14.4474 0.83529   1
  15   1   1 0.97341 0.52073   1
  15   1   2 1.15748 0.58741   1
  15   1   3 2.24286 0.58676   1
  15   1   4 1.98122 0.71186   1
  15   1   5 0.75417 0.62728   1
  15   1   6  1.3587 0.74051   1
  15   1   7 7.36796 1.08324   1
  15   2  -6 2.90809 0.83467   1
  15   2  -5 12.6035 0.98095   1
  15   2  -4 1.86484 0.68529   1
  15   2  -3 9.94418 0.82491   1
  15   2  -2  5.1708 0.69227   1
  15   2  -1 4.00758 0.61797   1
  15   2   0 0.92558 0.66856   1
  15   2   1 3.20901 0.64826   1
  15   2   2 2.54851 0.65864   1
  15   2   3 1.22808 0.80712   1
  15   2   4 8.79912 0.90004   1
  15   2   5 1.86974 0.80447   1
  15   2   6-0.39018 3.26287   1
  15   3  -5 3.33373 1.03721   1
  15   3  -4 0.45187 0.88547   1
  15   3  -3 5.03724 0.81734   1
  15   3  -2-0.07426 2.79989   1
  15   3  -1 1.01213 0.75728   1
  15   3   0-0.06719  2.5801   1
  15   3   1 2.80746 0.75423   1
  15   3   2 0.52335 0.77977   1
  15   3   3 0.65466   0.888   1
  15   3   4 2.58068 0.85817   1
  15   3   5 5.25003 0.96018   1
  15   4  -4  3.1255 0.89618   1
  15   4  -3-0.18586 2.93129   1
  15   4  -2 1.73228 0.90853   1
  15   4  -1 1.75785 0.71573   1
  15   4   0 1.33096 0.72639   1
  15   4   1 0.87815 0.75375   1
  15   4   2-1.21105 2.85927   1
  15   4   3 2.30521 1.01588   1
  15   4   4 4.40314 1.09923   1
  15   5  -3 2.58946  0.9216   1
  15   5  -2 3.12639 0.94483   1
  15   5  -1-0.60671 3.17135   1
  15   5   0 7.70586 1.00861   1
  15   5   1 1.71878 1.09587   1
  15   5   2 0.60199 1.11017   1
  15   5   3 0.22743 0.99659   1
  16  -8   0 17.4294 1.02547   1
  16  -8   1 6.25086 0.53145   1
  16  -8   2 38.8337 1.30045   1
  16  -8   3 1.21129 0.56017   1
  16  -8   4  13.699 0.77984   1
  16  -8   5 2.79569 0.56137   1
  16  -8   6 4.58578 0.66244   1
  16  -8   7 1.10127 0.71276   1
  16  -8   8  1.4138 0.81615   1
  16  -7  -8 0.65445 0.92781   1
  16  -7  -7 2.48002 0.77921   1
  16  -7  -6 6.39672 0.71311   1
  16  -7  -5 5.71846 0.81826   1
  16  -7  -4 22.0534 1.02074   1
  16  -7  -3 6.29506 0.56932   1
  16  -7  -2 6.42724 0.53314   1
  16  -7  -1  5.6643 0.49069   1
  16  -7   0 9.83427 0.60882   1
  16  -7   1 5.17354 0.52316   1
  16  -7   2 39.6115 1.34562   1
  16  -7   3-0.19892  1.9242   1
  16  -7   4 1.48558 0.51929   1
  16  -7   5 3.37267 0.58957   1
  16  -7   6 0.00503 0.65934   1
  16  -7   7 3.34971 1.00916   1
  16  -7   8 0.65799 0.89035   1
  16  -6  -8 3.01231 1.02789   1
  16  -6  -7 0.96858 0.73866   1
  16  -6  -6 3.34155 0.60701   1
  16  -6  -5 6.00162 0.64314   1
  16  -6  -4 1.48841  0.5153   1
  16  -6  -3 10.7809 0.69606   1
  16  -6  -2 2.61128  0.5127   1
  16  -6  -1  7.1196 0.51086   1
  16  -6   0 6.74273 0.51806   1
  16  -6   1 16.4054 0.75089   1
  16  -6   2 21.6628 0.90991   1
  16  -6   3 1.53299 0.47316   1
  16  -6   4 3.25514 0.52614   1
  16  -6   5  14.876 0.88786   1
  16  -6   6 1.23723 0.64496   1
  16  -6   7 0.37823  0.7211   1
  16  -6   8 2.06099  0.8662   1
  16  -5  -8-1.41843 4.38151   1
  16  -5  -7 0.55748 0.77781   1
  16  -5  -6 1.29088 0.70382   1
  16  -5  -5 5.98815 0.65419   1
  16  -5  -4 3.94157 0.57414   1
  16  -5  -3 20.6801 0.93644   1
  16  -5  -2 15.6753 0.75617   1
  16  -5  -1  23.347 0.92407   1
  16  -5   0 56.3615 1.77078   1
  16  -5   1 32.3133 1.17839   1
  16  -5   2 3.43218 0.51194   1
  16  -5   3 5.03207 0.55546   1
  16  -5   4 13.8027  0.7751   1
  16  -5   5 -0.1724 2.15106   1
  16  -5   6 2.40357 0.76417   1
  16  -5   7  3.3807 0.79934   1
  16  -5   8 2.17312 1.06846   1
  16  -4  -8 0.07695 0.95111   1
  16  -4  -7 0.40711 0.92848   1
  16  -4  -6 2.48912  0.6542   1
  16  -4  -5 0.30923 0.53189   1
  16  -4  -4 0.42953  0.5846   1
  16  -4  -3 18.9402 0.90116   1
  16  -4  -2  17.291 0.76664   1
  16  -4  -1 14.4236 0.74095   1
  16  -4   0  2.7112  0.4915   1
  16  -4   1-0.29888 1.99045   1
  16  -4   2 0.38464 0.44803   1
  16  -4   3 12.4329 0.75084   1
  16  -4   4 1.02383 0.63533   1
  16  -4   5 2.90301 0.55759   1
  16  -4   6 6.86745 0.77407   1
  16  -4   7 0.69887 0.78996   1
  16  -4   8 3.10395 0.92771   1
  16  -3  -8  2.0713 1.19571   1
  16  -3  -7 9.30304 1.04841   1
  16  -3  -6 0.50358 0.77059   1
  16  -3  -5 7.81654 0.72679   1
  16  -3  -4 6.77834 0.64074   1
  16  -3  -3 0.81495  0.5111   1
  16  -3  -2 16.9902 0.81683   1
  16  -3  -1 12.5908 0.78428   1
  16  -3   0 7.37022 0.59335   1
  16  -3   1 2.47357 0.50252   1
  16  -3   2 1.67963 0.48616   1
  16  -3   3 5.16085 0.59542   1
  16  -3   4 1.63752 0.63002   1
  16  -3   5 1.30617  0.7478   1
  16  -3   6 3.30111 0.78073   1
  16  -3   7 1.94361 0.77914   1
  16  -3   8 1.42464  0.8753   1
  16  -2  -7 9.83485 1.07566   1
  16  -2  -6 7.33986 0.89367   1
  16  -2  -5 0.66141 0.67638   1
  16  -2  -4 24.6406 1.11586   1
  16  -2  -3 4.25781 0.57802   1
  16  -2  -2 5.96465 0.62807   1
  16  -2  -1 5.11496 0.58687   1
  16  -2   0 9.10256 0.64814   1
  16  -2   1 3.30453 0.52326   1
  16  -2   2 4.50881 0.58706   1
  16  -2   3 1.79794 0.54073   1
  16  -2   4  0.7765 0.59352   1
  16  -2   5 7.59727 0.72674   1
  16  -2   6 2.31017 0.75042   1
  16  -2   7-1.28939 3.44473   1
  16  -1  -7 4.57526 1.15533   1
  16  -1  -6 6.82869 0.97492   1
  16  -1  -5 0.44134 0.71341   1
  16  -1  -4 3.64964 0.77769   1
  16  -1  -3  6.9973 0.72531   1
  16  -1  -2  1.4131 0.57963   1
  16  -1  -1 30.0481 1.25127   1
  16  -1   0  13.528 0.80361   1
  16  -1   1 1.46242 0.52711   1
  16  -1   2 0.92374 0.57858   1
  16  -1   3 1.77267 0.57674   1
  16  -1   4 3.75967 0.70667   1
  16  -1   5-0.62085 3.47348   1
  16  -1   6 1.77141 0.70998   1
  16  -1   7 5.63256 1.30318   1
  16   0  -6 0.89419 0.82024   1
  16   0  -5 0.88137 0.76947   1
  16   0  -4-0.94336 3.00067   1
  16   0  -3 8.51092  0.9882   1
  16   0  -2 3.99558 0.64413   1
  16   0  -1 0.63278 0.63624   1
  16   0   0 0.34263   0.654   1
  16   0   1 1.06271  0.7728   1
  16   0   2 1.39186 0.59819   1
  16   0   3 -0.1204 2.73418   1
  16   0   4 5.74585 0.82127   1
  16   0   5  4.9266 0.79842   1
  16   0   6  0.2585 0.95301   1
  16   1  -6  0.3862 1.40033   1
  16   1  -5 1.12326 0.92489   1
  16   1  -4 12.5031   0.996   1
  16   1  -3 1.13415 0.68782   1
  16   1  -2 0.47074 0.63577   1
  16   1  -1 3.55363 0.85929   1
  16   1   0 2.31568 0.60957   1
  16   1   1 1.47615 0.64036   1
  16   1   2  1.3979 0.67021   1
  16   1   3-0.48877 2.69263   1
  16   1   4 0.19144 0.75093   1
  16   1   5 3.81474  0.8599   1
  16   1   6 2.92962 0.94123   1
  16   2  -5 2.97807 0.98992   1
  16   2  -4 5.28747 0.88872   1
  16   2  -3-0.60025 3.68393   1
  16   2  -2 1.73492 0.87306   1
  16   2  -1 1.28478 0.64578   1
  16   2   0 2.13546 0.69865   1
  16   2   1-0.08894 4.01689   1
  16   2   2 2.05726   0.913   1
  16   2   3 5.76123 1.14866   1
  16   2   4 1.75104 0.85838   1
  16   2   5 1.90163 1.17539   1
  16   3  -4 2.74675 1.02729   1
  16   3  -3 5.21809 0.88701   1
  16   3  -2-0.17366 3.62857   1
  16   3  -1 1.72598 0.90206   1
  16   3   0 4.56964 0.83759   1
  16   3   1 7.70794 1.00482   1
  16   3   2 2.62644 0.91819   1
  16   3   3-0.08451   3.299   1
  16   3   4 4.10904 1.13267   1
  16   4  -2 18.1574 1.42854   1
  16   4  -1 1.53611 0.90313   1
  16   4   0 2.17702 0.98069   1
  16   4   1 1.09519 0.99992   1
  16   4   2 1.09659 1.22476   1
  17  -8  -8 1.40518 0.90844   1
  17  -8  -7 2.42255 0.82009   1
  17  -8  -6 1.14677 0.67355   1
  17  -8  -5   11.89 0.91983   1
  17  -8  -4 4.26143 0.62087   1
  17  -8  -3 18.3811 0.90838   1
  17  -8  -2 9.45075 0.62343   1
  17  -8  -1 4.68373 0.55002   1
  17  -8   0 0.56871 0.53861   1
  17  -8   1  1.2146 0.47811   1
  17  -8   2 8.56009 0.63517   1
  17  -8   3 11.5628  0.7399   1
  17  -8   4-0.07721 2.52388   1
  17  -8   5 5.93526 0.70439   1
  17  -8   6 0.09725 0.65173   1
  17  -8   7   2.633 0.78384   1
  17  -8   8 1.35383 0.93341   1
  17  -7  -8 0.34835 1.09809   1
  17  -7  -7 2.10273 0.83114   1
  17  -7  -6 3.95038  0.8157   1
  17  -7  -5 13.4031 0.89548   1
  17  -7  -4   12.17 0.83749   1
  17  -7  -3 13.1825 0.84515   1
  17  -7  -2 23.6212 0.98839   1
  17  -7  -1 10.5549 0.70942   1
  17  -7   0 18.3231 0.86765   1
  17  -7   1 34.5754 1.29674   1
  17  -7   2 2.49711 0.51531   1
  17  -7   3 7.73024 0.65904   1
  17  -7   4  5.3132 0.66571   1
  17  -7   5  0.0976 0.58137   1
  17  -7   6 0.28945 0.96854   1
  17  -7   7 1.57159 0.82131   1
  17  -7   8 0.43245 1.48794   1
  17  -6  -7-1.13812 3.39438   1
  17  -6  -6 4.42073 0.77981   1
  17  -6  -5 0.48578 0.65182   1
  17  -6  -4  3.8375 0.60736   1
  17  -6  -3 11.8324 0.78662   1
  17  -6  -2  19.636  0.9902   1
  17  -6  -1 13.5728 0.76538   1
  17  -6   0 2.40644 0.49659   1
  17  -6   1 8.98389  0.6453   1
  17  -6   2 3.65801 0.56363   1
  17  -6   3 0.90861 0.51663   1
  17  -6   4  8.6141 0.73283   1
  17  -6   5 7.66309 0.73368   1
  17  -6   6 2.28279 0.71673   1
  17  -6   7 2.71352 0.92966   1
  17  -5  -7-1.44288 3.97345   1
  17  -5  -6 2.52296 0.92257   1
  17  -5  -5 -1.1976 2.83962   1
  17  -5  -4 3.61305 0.62662   1
  17  -5  -3 1.03346 0.53682   1
  17  -5  -2 1.60195 0.62848   1
  17  -5  -1 1.81259 0.54752   1
  17  -5   0  19.438 0.92107   1
  17  -5   1 14.4694 0.80224   1
  17  -5   2-0.14764 2.16704   1
  17  -5   3 0.04553 0.65305   1
  17  -5   4-0.51832 2.41253   1
  17  -5   5 0.10647 0.76638   1
  17  -5   6 0.76347 0.68107   1
  17  -5   7 1.38131 0.97394   1
  17  -4  -7 1.36268 0.86951   1
  17  -4  -6  1.9153 0.90241   1
  17  -4  -5 1.07522 0.66432   1
  17  -4  -4 5.36415 0.67404   1
  17  -4  -3 1.20572  0.5863   1
  17  -4  -2 6.24577 0.71367   1
  17  -4  -1 14.9202 0.81478   1
  17  -4   0 23.1003 1.01573   1
  17  -4   1 19.3072 0.93076   1
  17  -4   2 1.30628 0.59089   1
  17  -4   3  6.8498 0.78923   1
  17  -4   4 2.97898 0.62894   1
  17  -4   5 1.48086 0.71172   1
  17  -4   6 2.97774 1.24841   1
  17  -4   7 1.71172 0.89985   1
  17  -3  -7  6.6056 1.24478   1
  17  -3  -6 7.20266 0.92684   1
  17  -3  -5 7.22584 0.88502   1
  17  -3  -4 0.11806 0.64028   1
  17  -3  -3 7.86981 0.77897   1
  17  -3  -2 3.01468 0.64813   1
  17  -3  -1 11.9089 0.78687   1
  17  -3   0 0.62476  0.6326   1
  17  -3   1 2.24425 0.57825   1
  17  -3   2 4.36371 0.72685   1
  17  -3   3 1.59064 0.57921   1
  17  -3   4 4.76867 0.79274   1
  17  -3   5 11.3853   0.947   1
  17  -3   6 0.83088 0.95295   1
  17  -3   7 1.69458 0.92561   1
  17  -2  -6 1.63691  1.1231   1
  17  -2  -5 12.2655 1.05198   1
  17  -2  -4 2.03919 0.75942   1
  17  -2  -3   9.208 0.86375   1
  17  -2  -2 6.86453 0.76596   1
  17  -2  -1 2.94484 0.64955   1
  17  -2   0 1.61026 0.57497   1
  17  -2   1 3.68786 0.62081   1
  17  -2   2 1.38126 0.59541   1
  17  -2   3 0.44703 0.66138   1
  17  -2   4 9.47855 0.84085   1
  17  -2   5  1.2413 0.78873   1
  17  -2   6 1.67811 0.82502   1
  17  -1  -6-0.23723 4.41798   1
  17  -1  -5 0.38614 0.88089   1
  17  -1  -4 12.3684  1.0648   1
  17  -1  -3 -0.8373 2.79488   1
  17  -1  -2 0.17107 0.64392   1
  17  -1  -1 4.24774 0.68777   1
  17  -1   0 0.81822 0.70325   1
  17  -1   1 0.75849 0.62203   1
  17  -1   2 2.00786 0.71181   1
  17  -1   3 1.25457 0.99207   1
  17  -1   4 0.68297 0.80369   1
  17  -1   5 3.41729 0.95061   1
  17  -1   6 2.35814 0.89559   1
  17   0  -5-1.28786 3.45287   1
  17   0  -4 1.94476 1.15501   1
  17   0  -3 -0.8413 3.40772   1
  17   0  -2 2.97867 0.83625   1
  17   0  -1 0.25229 0.67117   1
  17   0   0 0.52403 0.83978   1
  17   0   1 0.56043   0.708   1
  17   0   2 0.29039 0.83711   1
  17   0   3 0.99433 0.88208   1
  17   0   4-0.46325 3.07349   1
  17   0   5 2.90736 0.84064   1
  17   1  -4-0.31219 4.45862   1
  17   1  -3 4.11606  1.1657   1
  17   1  -2 4.52973 0.77321   1
  17   1  -1 6.43983 1.01017   1
  17   1   0 1.30712 0.81148   1
  17   1   1 3.34065 0.78471   1
  17   1   2 2.06995 1.05807   1
  17   1   3-0.18166 3.53966   1
  17   1   4 1.41314 0.95792   1
  17   2  -3 0.80476 1.21351   1
  17   2  -2 7.06262 0.96541   1
  17   2  -1 0.48067  0.8428   1
  17   2   0 4.47193 1.00421   1
  17   2   1 1.35689 0.93973   1
  17   2   2 3.04333 1.18963   1
  17   2   3 5.78101 1.26208   1
  18  -9   0 12.3801 1.11107   1
  18  -9   1 10.2208 0.73135   1
  18  -9   2 0.73842 0.54358   1
  18  -9   3 4.50081 0.72058   1
  18  -9   4 2.02322 0.69219   1
  18  -9   5 2.85831 0.72717   1
  18  -9   6 -0.1423 4.10022   1
  18  -9   7 0.25233 1.03232   1
  18  -8  -7 1.45841 0.86825   1
  18  -8  -6  6.5475 0.95432   1
  18  -8  -5 0.73362 0.97603   1
  18  -8  -4 7.12408 0.93709   1
  18  -8  -3  8.4062 0.72099   1
  18  -8  -2 3.42035 0.58549   1
  18  -8  -1 6.27936 0.62822   1
  18  -8   0 2.89203 0.62717   1
  18  -8   1 7.36801 0.69294   1
  18  -8   2 1.05858 0.66253   1
  18  -8   3 2.01186 0.60502   1
  18  -8   4 3.74287 0.68647   1
  18  -8   5 2.96888 0.71539   1
  18  -8   6 0.78648 0.99177   1
  18  -8   7 3.29696 1.08398   1
  18  -7  -7 0.72178  1.0194   1
  18  -7  -6 4.25492 0.81769   1
  18  -7  -5 0.73989 0.76738   1
  18  -7  -4 0.96971 0.83187   1
  18  -7  -3 4.32874 0.70801   1
  18  -7  -2 1.57698 0.60963   1
  18  -7  -1 1.17705 0.58854   1
  18  -7   0   8.438  0.7372   1
  18  -7   1 1.11126 0.60549   1
  18  -7   2  0.5735  0.6515   1
  18  -7   3 11.0424  0.7903   1
  18  -7   4  0.0798 0.62156   1
  18  -7   5 1.01888 0.75796   1
  18  -7   6 1.75345 0.87378   1
  18  -7   7 1.23959 0.99812   1
  18  -6  -6 2.81259 1.34193   1
  18  -6  -5-0.19291 3.24128   1
  18  -6  -4 2.04663 0.74972   1
  18  -6  -3 2.81241 0.72629   1
  18  -6  -2 15.6166 0.95853   1
  18  -6  -1 10.0456 0.78669   1
  18  -6   0 6.96189 0.71438   1
  18  -6   1  3.9343  0.6141   1
  18  -6   2 6.74285 0.89139   1
  18  -6   3 2.64795 0.66236   1
  18  -6   4 1.21094 0.66281   1
  18  -6   5 1.35888 0.70302   1
  18  -6   6 1.41139  0.9617   1
  18  -5  -6 1.10118 0.84035   1
  18  -5  -5 3.33725  0.7683   1
  18  -5  -4 6.37803 1.13586   1
  18  -5  -3  2.5673 0.90929   1
  18  -5  -2  1.3255 0.73017   1
  18  -5  -1  11.622 0.84687   1
  18  -5   0 0.73444 0.60229   1
  18  -5   1 4.42054 0.62532   1
  18  -5   2 3.09518 0.65478   1
  18  -5   3 5.08377 0.80689   1
  18  -5   4  4.1705  1.1041   1
  18  -5   5 2.54651 1.26301   1
  18  -5   6 3.27164 0.94309   1
  18  -4  -6 0.13391 1.13822   1
  18  -4  -5 2.79088 0.89753   1
  18  -4  -4 1.46599 0.75785   1
  18  -4  -3  2.5066 0.82423   1
  18  -4  -2 1.59349 0.67918   1
  18  -4  -1 0.88243 0.62379   1
  18  -4   0 8.09836 0.76223   1
  18  -4   1 4.97055 0.76988   1
  18  -4   2 0.78896 0.63098   1
  18  -4   3 2.18868 1.00754   1
  18  -4   4 3.43386 1.16602   1
  18  -4   5 1.86173 1.03709   1
  18  -4   6 2.47752 1.60632   1
  18  -3  -5 4.38193 1.01599   1
  18  -3  -4 1.96374 0.80411   1
  18  -3  -3  4.8054 0.76902   1
  18  -3  -2 0.28878 0.66116   1
  18  -3  -1 0.07817 0.85719   1
  18  -3   0 1.08789 0.63905   1
  18  -3   1 2.35552 0.65798   1
  18  -3   2  2.5023 0.74723   1
  18  -3   3 0.49829  0.7624   1
  18  -3   4 3.41886 0.83293   1
  18  -3   5 3.87533 0.91841   1
  18  -2  -5 0.12388  0.9114   1
  18  -2  -4  4.3987 1.00716   1
  18  -2  -3 1.28168 0.81802   1
  18  -2  -2  0.9862 0.74556   1
  18  -2  -1-0.28828 3.20999   1
  18  -2   0 2.52729 0.86725   1
  18  -2   1 0.32304 0.65558   1
  18  -2   2 0.52813 0.71948   1
  18  -2   3 4.55367 0.87461   1
  18  -2   4 2.60402 0.89795   1
  18  -2   5 1.00893 0.84853   1
  18  -1  -4-0.18692 3.56194   1
  18  -1  -3 1.15277 1.02776   1
  18  -1  -2 3.78376 0.85338   1
  18  -1  -1 5.68043 0.88975   1
  18  -1   0-0.37595 3.01313   1
  18  -1   1 2.58775 0.89138   1
  18  -1   2 0.18172 0.90239   1
  18  -1   3 0.27737 1.16742   1
  18  -1   4 2.76098 1.13778   1
  18   0  -3-1.08318 3.68328   1
  18   0  -2-2.11549 4.20596   1
  18   0  -1 0.61383 1.13714   1
  18   0   0 6.47934 1.02224   1
  18   0   1  3.2479 1.23736   1
  18   0   2 2.46625 1.07926   1
  18   0   3 0.59402 0.86827   1
  18   1  -1 4.20639 1.07656   1
  18   1   0-0.44277 4.16064   1
  18   1   1 4.39814 1.05471   1
  19  -9  -6 2.96397 1.07401   1
  19  -9  -5-0.90827 3.46666   1
  19  -9  -4 0.33874 0.82237   1
  19  -9  -3 5.56243 0.80759   1
  19  -9  -2 1.30503 0.87127   1
  19  -9  -1 0.62562  0.6066   1
  19  -9   0 3.69613 0.72294   1
  19  -9   1 6.73273 0.93495   1
  19  -9   2 0.40248 0.64576   1
  19  -9   3 8.60301 0.92671   1
  19  -9   4 2.86496 1.01892   1
  19  -9   5 1.20604 0.72871   1
  19  -9   6-1.52704 4.15042   1
  19  -8  -6 3.64855  1.1339   1
  19  -8  -5 3.76888 0.92951   1
  19  -8  -4  4.8792 0.92274   1
  19  -8  -3 2.10819 1.06076   1
  19  -8  -2 1.69115 0.98586   1
  19  -8  -1 4.97341 0.75109   1
  19  -8   0 2.41278 0.85324   1
  19  -8   1 1.65456 0.70364   1
  19  -8   2 0.25388 0.75414   1
  19  -8   3 4.04663 0.72914   1
  19  -8   4 2.21914 0.72756   1
  19  -8   5-0.34711 3.13377   1
  19  -8   6 2.35694 1.19117   1
  19  -7  -5 5.72633 1.30658   1
  19  -7  -4 3.44554  0.9803   1
  19  -7  -3 3.13085 0.84558   1
  19  -7  -2  2.4772  0.8048   1
  19  -7  -1 10.2183 0.87517   1
  19  -7   0 0.31001 0.65041   1
  19  -7   1  1.4283 0.69251   1
  19  -7   2  4.1228 0.73935   1
  19  -7   3 1.64168 0.85789   1
  19  -7   4-0.11592 3.04693   1
  19  -7   5  2.1997 0.87414   1
  19  -6  -5 2.74099 1.04774   1
  19  -6  -4 2.05529 0.86834   1
  19  -6  -3 3.84696 1.00606   1
  19  -6  -2 5.21746 0.88465   1
  19  -6  -1 0.59924 0.73493   1
  19  -6   0   0.987 0.75313   1
  19  -6   1 6.48795 0.82098   1
  19  -6   2 1.00243 0.72005   1
  19  -6   3 2.13583 0.71818   1
  19  -6   4 2.04457 0.97178   1
  19  -6   5 2.53025 0.97311   1
  19  -5  -5 0.72023 0.95567   1
  19  -5  -4 4.50616 1.00349   1
  19  -5  -3 0.07353 0.81053   1
  19  -5  -2 0.82151 0.80452   1
  19  -5  -1  4.0903 0.76731   1
  19  -5   0 1.52628 0.93541   1
  19  -5   1 0.44096 0.85323   1
  19  -5   2 0.15441  0.6777   1
  19  -5   3 5.65706 0.89911   1
  19  -5   4  0.2085 1.15417   1
  19  -5   5 0.26409 1.13376   1
  19  -4  -4 4.10411  1.2613   1
  19  -4  -3 0.91759 0.77549   1
  19  -4  -2-1.19355 3.04968   1
  19  -4  -1 0.86123 0.88788   1
  19  -4   0 0.13361 0.97389   1
  19  -4   1 1.46363 0.75601   1
  19  -4   2  1.3131 1.20021   1
  19  -4   3 4.92815 0.85351   1
  19  -4   4 5.78062   0.989   1
  19  -3  -4  1.8653 0.97682   1
  19  -3  -3 4.86687 0.99308   1
  19  -3  -2-0.03344 3.91432   1
  19  -3  -1 2.61475 0.77835   1
  19  -3   0 4.06925  0.8724   1
  19  -3   1 8.77931 1.00916   1
  19  -3   2 2.74372 0.86662   1
  19  -3   3 1.36636 0.89535   1
  19  -3   4 3.46621  1.0102   1
  19  -2  -3 1.13886 1.07255   1
  19  -2  -2 5.38377 0.94985   1
  19  -2  -1 0.11379  0.8487   1
  19  -2   0 1.86598 1.31711   1
  19  -2   1-0.49556 4.30504   1
  19  -2   2 2.37415 0.94279   1
  19  -2   3 5.39946 1.12188   1
  19  -1  -1 1.13217 1.05965   1
  19  -1   0 1.00072 1.02272   1
  19  -1   1 3.50389 1.11206   1
  20 -10   0 4.16017 1.83057   1
  20 -10   1 8.95197 0.97424   1
  20 -10   2 3.82188 0.84054   1
  20 -10   3  0.9283 1.03036   1
  20 -10   4 2.83663 0.93223   1
  20  -9  -4 -0.2476 3.47676   1
  20  -9  -3 5.02554 0.96164   1
  20  -9  -2 2.33259 0.97137   1
  20  -9  -1 3.62006 0.87023   1
  20  -9   0  2.4062 0.74527   1
  20  -9   1 2.99469 0.75189   1
  20  -9   2 3.91157 0.89041   1
  20  -9   3 2.81773 0.83974   1
  20  -9   4 1.32676 1.02058   1
  20  -8  -4 8.09086 1.40786   1
  20  -8  -3 0.23739 1.10809   1
  20  -8  -2 2.85463 1.13091   1
  20  -8  -1 5.23139 0.96116   1
  20  -8   0 1.00506 0.83876   1
  20  -8   1 12.6573 0.98433   1
  20  -8   2 2.81449 0.79282   1
  20  -8   3 8.26373 1.00169   1
  20  -8   4 1.28447 1.03567   1
  20  -7  -4 3.95644  1.2943   1
  20  -7  -3-0.19674 4.86193   1
  20  -7  -2 3.43573 1.04281   1
  20  -7  -1 4.35518 0.86377   1
  20  -7   0 0.67492 0.80821   1
  20  -7   1 2.55459 0.83757   1
  20  -7   2-0.84333 3.63046   1
  20  -7   3 3.65189 1.07801   1
  20  -7   4 1.95716 1.33937   1
  20  -6  -3 3.67057 1.09197   1
  20  -6  -2 5.04902 1.19176   1
  20  -6  -1 0.79527  0.8523   1
  20  -6   0 4.43686 0.91563   1
  20  -6   1 2.53694  0.9996   1
  20  -6   2 3.94916 1.01357   1
  20  -6   3 2.28064 1.05857   1
  20  -5  -3 1.10428  1.0478   1
  20  -5  -2 4.92505 1.01872   1
  20  -5  -1 1.86339 1.11935   1
  20  -5   0 7.73933 1.02858   1
  20  -5   1 1.07193  0.9466   1
  20  -5   2 2.00317 0.95236   1
  20  -5   3 1.04075  0.9528   1
  20  -4  -2 17.2366 1.49187   1
  20  -4  -1 0.81288 0.90366   1
  20  -4   0 4.01295  1.0163   1
  20  -4   1 3.59602 1.32039   1
  20  -4   2 1.68799 1.23768   1
  21 -10  -2 4.09043 1.23202   1
  21 -10  -1-0.74923 4.31015   1
  21 -10   0 1.52262 1.31368   1
  21 -10   1 7.73334 1.00064   1
  21 -10   2 0.90631 1.11118   1
  21  -9  -2 5.69617 1.12345   1
  21  -9  -1 5.15708 1.01602   1
  21  -9   0 0.91261 0.91072   1
  21  -9   1 2.83002 1.15193   1
  21  -9   2 3.85353 0.86211   1
  21  -8  -2 3.86719  1.5526   1
  21  -8  -1 0.56118 1.25978   1
  21  -8   0-0.28477 4.18748   1
  21  -8   1 4.32356 0.95447   1
  21  -8   2 5.22521 1.17817   1
  21  -7  -1-0.58212 3.69342   1
  21  -7   0 15.5074 1.34606   1
  21  -7   1 2.14522 1.17117   1
   0   0   0    0.00    0.00   1
;
_shelx_hkl_checksum     38715
 
# END of CIF
